# Supplementary material for: The largest diamonds are hosted in iron-rich substrate accreted at the base of the lithosphere
Source: Research Square preprint supplement (doi:10.21203/rs.3.rs-6808081/v1), 2025-06-06
Supplement: Supplementary file 1 [file 4026ad388028184ee12c4df6.xlsx]

## Sheet: Monastery
Dataset 1a.EPMA, LA-ICP-MS and Al-in-olivine thermometry data for Monastery kimberlite.
					LA-ICP-MS data done at Stellenbosch - See methods.																				EPMA data done at University of Joburg - See methods.
	Spot Size (µm)	T (°C)	P (kbars)		Li	Na	Al	Ca	Sc	Ti	V	Cr	Mn	Co	Ni	Cu	Zn	Rb	Sr	Y	Zr	Nb	Ba		MgO	CaO	FeO	MnO	Cr2O3	SiO2	NiO	Total		Mg#
Peridotitic olivine
ROM-05C_OL2 - 1	100	1013.47	40.1148		1.2283	48.5637	33.2695	164.86	0.761065	82.2519	4.14339	102.06	784.582	138.356	2950.78	0.741183	47.5056	< LOD	0.00848818	0.0032039	0.432957	0.670352	0.00364477		49.68	0.03	8.36	0.1	0.02	41.36	0.4	99.98		91.3727
ROM-05C_OL3 - 1	100	1162.52	47.9698		1.53847	107.687	74.3997	326.597	1.08479	232.779	7.39705	191.638	832.636	139.875	2876.13	6.18883	54.7446	0.0272436	0.197779	0.00719325	0.218575	0.136167	0.284233		49.1	0.04	9.02	0.11	0	41.19	0.4	99.95		90.6593
ROM-05C_OL3 - 2	100	1162.61	47.9746		1.78416	105.052	74.4327	309.214	1.11765	231.055	7.33225	193.064	839.993	140.821	2884.33	6.13754	55.3242	< LOD	0.00853219	0.00484326	0.200172	0.0923363	0.0100125		49.1	0.04	9.02	0.11	0	41.19	0.4	99.95		90.6593
ROM-05C_OL4 - 1	70	1075.5	43.3837		1.70284	107.016	47.5215	311.26	1.09366	196.74	4.70665	241.037	822.376	92.9085	3226.92	1.54591	52.2747	0.156022	1.4837	0.0294495	0.66817	0.543138	2.09269		50.44	0.02	7.51	0.09	0.05	41.62	0.39	100.19		92.287
ROM-05C_OL5 - 2	100	1013.05	40.0928		1.86785	83.0646	33.1859	212.34	1.1574	187.172	4.38523	156.457	902.881	131.226	2280.82	1.12021	65.7123	0.0133024	0.166989	0.00810974	0.494462	0.322367	0.277539		48.46	0.03	9.62	0.11	0.03	41.18	0.29	99.79		89.9761
ROM-05C_OL5 - 3	100	1011.42	40.0071		1.57771	77.6463	32.8615	202.099	1.15883	185.094	4.35711	155.718	900.052	129.857	2266.54	1.1139	65.1625	< LOD	0.00152057	0.00525798	0.453414	0.277479	< LOD		48.55	0.05	9.67	0.13	0.03	41.23	0.32	100.01		89.9464
ROM-05C_OL5 - 4	100	1011.59	40.0156		1.79583	76.8816	32.8937	207.698	1.16408	185.708	4.38232	157.03	901.728	130.065	2263.77	1.08892	65.3268	< LOD	0.00138854	0.00624263	0.439472	0.277285	0.00257149		48.46	0.03	9.62	0.11	0.03	41.18	0.29	99.79		89.9761
ROM-05C_OL6 - 1	70	1030.62	41.0185		1.50433	111.078	36.8408	344.646	1.32775	176.788	3.99941	103.596	937.172	113.659	3152.69	1.41768	57.8348	0.231566	1.99708	0.0440836	1.0228	0.700243	2.6886		48.95	0.04	9.17	0.09	0.02	41.34	0.33	100		90.4884
ROM-05C_OL7 - 1	70	994.497	39.115		1.13441	49.0897	29.6251	140.371	0.734924	23.5184	3.36336	104.011	662.893	108.329	3846.87	1.01796	42.1446	< LOD	0.00391747	< LOD	0.375151	1.12224	0.00144107		50.7	0.01	6.98	0.08	0.04	41.5	0.44	99.79		92.8244
ROM-05C_OL8 - 1	70	1224.2	51.2203		2.13943	152.623	99.0489	453.822	1.1873	81.8364	7.00032	237.884	837.766	120.271	3588.6	9.40041	55.3243	0.107476	1.10534	0.0345625	0.507855	0.280095	1.52034		49.34	0.05	8.82	0.12	0.01	41.15	0.4	99.94		90.8828
ROM-05C_OL11 - 1	70	1056.46	42.3803		1.21115	66.4146	42.7463	225.579	1.05116	204.6	4.78287	101.462	862.318	99.2032	2776.12	1.32781	64.5187	0.00761828	0.0537026	0.00532682	0.340178	0.235791	0.0692855		49.05	0.02	9.16	0.12	0.01	41.15	0.32	99.86		90.5179
ROM-05C_OL11 - 2	70	1056.87	42.4022		1.37246	78.7674	42.8462	247.887	1.0522	205.803	4.75241	102.043	861.424	99.608	2781.48	1.36529	64.1557	0.0624559	0.500337	0.0122839	0.431764	0.31577	0.665369		49.05	0.02	9.16	0.12	0.01	41.15	0.32	99.86		90.5179
ROM-05C_OL12 - 1	100	1290.4	54.7092		1.60373	124.737	131.321	425.677	1.06682	104.224	8.53582	206.929	869.853	139.563	2843.77	10.8862	56.8244	< LOD	0.00228619	0.0079302	0.172554	0.0395561	0.000872226		48.68	0.07	9.44	0.12	0.03	40.94	0.37	99.78		90.1846
ROM-05C_OL12 - 2	100	1282.82	54.3097		1.82625	125.166	127.303	433.425	1.09603	104.294	8.48189	207.219	878.165	140.18	2856.95	10.9472	57.2052	< LOD	0.00249825	0.00661948	0.163044	0.040594	< LOD		48.91	0.05	9.4	0.1	0.03	41.05	0.38	99.96		90.2627
ROM-05C_OL14 - 1	100	844.131	31.1907		1.08814	8.29016	10.2749	72.825	0.583444	11.3144	1.86806	26.5396	643.58	129.62	3125.49	0.110192	32.1562	< LOD	< LOD	< LOD	0.0403051	2.04231	0.000432542		50.96	0.01	6.83	0.08	0	41.48	0.41	99.8		93.0059
ROM-05C_OL15 - 1	100	851.566	31.5825		0.840177	12.7586	10.8994	103.187	0.961	7.92803	1.73456	24.6497	737.914	126.927	2904.72	0.310515	33.1978	0.0200211	0.221292	0.00709984	0.203981	0.85646	0.31085		50.74	0	7	0.11	0	41.86	0.39	100.11		92.8187
ROM-05C_OL22 - 1	100	1195.62	49.714		1.92699	110.144	87.0073	348.221	1.20744	203.187	7.9035	188.052	897.956	139.226	2798.15	6.74336	56.3936	< LOD	0.00475611	0.005317	0.138706	0.066643	0.000431261		48.98	0.06	9.37	0.12	0.02	41.13	0.41	100.27		90.3106
ROM-05C_OL24 - 1	100	1103.81	44.8757		1.7621	77.1556	55.3255	233.3	1.0249	204.969	6.15849	70.7256	857.656	137.613	2965.93	2.80081	63.9946	0.00300239	0.0017519	0.00660988	0.285313	0.155398	0.000434223		48.7	0.01	9.54	0.11	0	40.93	0.44	99.76		90.0943
ROM-05C_OL24 - 2	100	1103.91	44.8809		1.75166	74.5349	55.3543	225.128	0.979367	204.832	6.1442	71.2053	854.676	137.535	2950.11	2.80503	63.3962	< LOD	0.00960537	0.0050349	0.280938	0.148926	0.00694909		48.7	0.01	9.54	0.11	0	40.93	0.44	99.76		90.0943
ROM-05C_OL25 - 1	100	1210.41	50.4937		2.33797	166.678	93.1039	429.527	1.4157	255.911	8.64121	302.963	890.45	137.604	2822.87	5.71827	63.2483	0.0830628	0.765322	0.0221576	0.612935	0.233815	1.04272		48.61	0.04	9.87	0.1	0.07	40.9	0.4	100.05		89.7758
ROM-05C_OL26 - 1	100	891.636	33.6942		1.44581	19.3235	14.7877	76.2617	0.725271	5.09121	1.79896	44.4377	709.906	131.348	3086.65	0.0463551	37.6173	< LOD	0.000791995	< LOD	0.0610544	2.36607	< LOD		50.92	0.01	7.16	0.1	0	41.67	0.39	100.25		92.6841
ROM-05C_OL26 - 2	100	892.043	33.7157		1.09302	19.3221	14.832	80.4972	0.719581	5.26364	1.78008	44.4071	710.621	131.542	3067.62	0.0516135	37.6651	< LOD	< LOD	0.000533312	0.058162	2.39444	< LOD		50.92	0.01	7.16	0.1	0	41.67	0.39	100.25		92.6841
ROM-05C_OL26 - 3	100	891.513	33.6877		1.31663	19.23	14.7743	73.8811	0.726222	4.99159	1.80104	44.5679	713.064	132.069	3094.16	0.0463948	37.8046	< LOD	< LOD	0.000829472	0.0600513	2.48606	< LOD		50.92	0.01	7.16	0.1	0	41.67	0.39	100.25		92.6841
ROM-05C_OL29 - 1	100	866.039	32.3453		1.23013	13.2764	12.1993	89.0288	0.435165	1.81023	2.02577	34.2085	626.84	131.789	3135.55	0.112814	36.854	< LOD	< LOD	< LOD	0.0152109	0.65047	< LOD		50.64	0.02	7.08	0.08	0.02	41.26	0.41	99.54		92.7198
ROM-05C_OL30 - 1	100	913.087	34.8247		0.987041	25.6523	17.2643	97.9273	0.95624	12.5559	1.84701	49.6179	755.516	129.092	3007.26	1.07294	40.8889	< LOD	0.0165186	0.00166582	0.165362	3.73239	0.0110337		50.66	0.03	7.17	0.1	0.03	41.61	0.38	100.01		92.6363
ROM-05C_OL30 - 2	100	1492.19	65.3432		0.893128	64.6814	272.258	276.677	0.937809	17.5703	1.98985	48.9127	755.195	128.555	2987.21	1.43556	42.3119	0.108043	1.60784	0.0184739	0.326404	3.88206	1.80926		50.66	0.03	7.17	0.1	0.03	41.61	0.38	100.01		92.6363
ROM-08B_OL5 - 1	100	1015.78	40.2364		1.0237	60.8434	33.7344	138.552	0.743882	62.012	4.43041	157.992	619.817	124.3	2998.58	0.621691	37.9726	< LOD	0.00094523	0.00548977	0.591699	0.634538	< LOD		51.11	0.02	6.47	0.07	0.03	41.54	0.39	99.66		93.3683
ROM-08B_OL5 - 2	100	1015.24	40.2083		1.11741	61.0426	33.6265	141.21	0.762024	61.8856	4.48301	159.763	626.037	125.534	3034.9	0.638185	38.3446	< LOD	0.00110964	0.00514751	0.590076	0.62216	< LOD		51.15	0.03	6.6	0.09	0.03	41.78	0.42	100.17		93.2515
ROM-08B_OL6 - 1	100	986.873	38.7132		1.13158	41.0611	28.2478	145.537	0.525853	4.67175	3.85448	112.022	664.384	133.193	3101.46	0.722706	43.3732	< LOD	0.00515867	< LOD	0.106462	0.838207	0.0109827		50.62	0.01	7.37	0.11	0	41.51	0.41	100.06		92.4465
ROM-08B_OL7 - 1	100	1061.28	42.6344		1.52294	90.6987	43.9207	223.598	1.2684	184.926	5.34228	236.526	904.009	131.958	3033.67	2.56058	47.9571	< LOD	0.000866479	0.00360603	0.318095	0.221447	< LOD		49.53	0.04	8.85	0.12	0.04	41.16	0.45	100.25		90.8892
ROM-08B_OL7 - 2	100	1062.46	42.6967		1.73908	90.5925	44.2122	213.393	1.27702	184.77	5.32561	237.566	908.625	132.288	3027.49	2.56662	48.4239	< LOD	0.00091958	0.00281495	0.319613	0.219812	< LOD		49.44	0.03	8.65	0.12	0.05	41.06	0.42	99.83		91.0538
ROM-08B_OL7 - 3	100	1062.58	42.7031		1.61028	90.6741	44.2421	215.295	1.29716	185.696	5.40464	237.869	908.672	132.68	3021.51	2.49925	48.2109	< LOD	< LOD	0.00320221	0.317518	0.220756	< LOD		49.44	0.03	8.65	0.12	0.05	41.06	0.42	99.83		91.0538
ROM-08B_OL8 - 1	100	1070.65	43.1281		1.83726	96.5442	46.2699	274.27	1.30439	192.477	5.4973	240.008	920.558	133.845	3057.57	2.46579	49.2027	0.0223372	0.375903	0.00723066	0.442715	0.276449	0.402899		49.43	0.04	8.78	0.13	0.05	41.19	0.45	100.14		90.9329
ROM-08B_OL10 - 1	100	862.338	32.1502		2.36233	36.9055	11.8561	171.266	0.729059	59.4489	1.2702	32.8943	920.117	131.106	2408.73	0.204368	61.4369	< LOD	0.0648852	0.00676162	0.212595	3.74795	0.00723577		49.32	0.01	9.17	0.13	0.01	41.11	0.33	100.08		90.5521
ROM-08B_OL10 - 2	100	861.805	32.1221		2.10828	37.3979	11.8073	114.021	0.712599	57.2298	1.27129	31.7989	920.84	131.351	2426.63	0.271681	61.0536	< LOD	0.0182553	0.00646788	0.217113	3.47038	0.00179916		49.32	0.01	9.17	0.13	0.01	41.11	0.33	100.08		90.5521
ROM-08B_OL11 - 1	100	868.187	32.4584		1.12297	19.9777	12.402	82.5605	0.549303	3.94394	1.93436	35.6577	661.407	130.857	3016.03	0.599723	38.9941	0.00541151	0.0252969	0.00106189	0.055912	1.23831	0.00828619		50.85	0.01	7.07	0.09	0	41.52	0.41	99.97		92.7706
ROM-08B_OL12 - 1	70	985.676	38.6501		1.64482	114.55	28.036	218.046	0.922162	98.4125	3.0412	310.453	573.075	92.1863	3333.57	3.33054	37.2165	0.0346167	0.427077	0.00870562	0.416949	0.304658	0.46111		51.75	0.03	5.74	0.07	0.05	41.79	0.39	99.84		94.145
ROM-08B_OL12 - 2	70	980.428	38.3736		1.42248	107.777	27.1213	220.334	0.936176	96.4188	3.02363	312.019	574.068	91.7857	3290.78	3.10019	35.9631	0.0335136	0.35575	0.0101461	0.395228	0.289475	0.521091		51.75	0.03	5.74	0.07	0.05	41.79	0.39	99.84		94.145
ROM-08B_OL14 - 1	70	986.16	38.6756		1.33014	58.4563	28.1214	195.767	1.25579	178.273	3.81936	72.9939	933.222	108.594	2927.06	1.31323	60.8247	0.00587596	0.0138579	0.00576226	0.440319	0.325176	0.0435637		49.45	0.02	9.36	0.14	0.04	41.29	0.35	100.7		90.3958
ROM-08B_OL15 - 1	100	889.951	33.6054		1.36864	81.9098	14.6053	185.095	0.489061	6.34222	2.4423	42.6644	653.292	130.832	3028.68	0.382993	39.9028	0.121007	1.65247	0.0269582	0.248025	1.04027	2.69348		51.01	0.02	7.17	0.1	0.01	41.54	0.43	100.31		92.6829
ROM-08B_OL15 - 2	100	885.242	33.3573		1.02197	17.5619	14.105	88.4825	0.479786	5.48763	2.37573	42.5097	654.898	130.784	3033.42	0.137103	39.6097	< LOD	0.00197298	< LOD	0.0236116	0.736321	0.00268581		50.73	0.02	7.14	0.09	0.01	41.46	0.44	99.91		92.6819
ROM-08B_OL16 - 1	70	1011.72	40.0226		1.03042	67.7064	32.9201	154.632	0.656019	15.8761	4.63618	70.7094	570.094	107.081	3924.59	0.554011	41.1422	0.0153222	0.212301	0.00917059	0.593915	0.845381	0.22677		51.26	0.01	6.69	0.08	0.03	41.68	0.47	100.26		93.1781
ROM-08B_OL16 - 2	70	1009.28	39.894		1.29387	59.3435	32.4375	136.713	0.641196	15.2838	4.66022	71.0701	570.335	107.085	3909.62	0.481048	41.4754	0.0091356	0.0235231	0.00307089	0.535005	0.788015	0.0125116		51.26	0.01	6.69	0.08	0.03	41.68	0.47	100.26		93.1781
ROM-08B_OL18 - 1	70	1208.01	50.3672		1.38566	148.538	92.0945	431.009	1.53471	223.551	8.53309	290.233	891.228	115.221	3588.18	6.31553	51.795	0.0894973	1.00422	0.0290033	0.727134	0.277101	1.39226		49.58	0.05	8.62	0.1	0.04	41.22	0.4	100.12		91.1145
ROM-08B_OL21 - 1	100	1075.76	43.3978		3.87203	143.62	47.591	415.636	1.28424	88.041	2.74083	93.882	907.255	129.382	3049.94	1.08798	56.8149	0.264669	2.75357	0.0690375	2.80189	1.08777	3.77812		49.97	0.02	7.94	0.12	0.03	41.17	0.43	99.7		91.8173
ROM-08B_OL22 - 1	100	1172.08	48.4738		1.77175	173.277	77.8998	713.271	1.22081	262.294	7.60016	292.992	847.37	134.046	2872.76	5.73939	50.5304	0.418255	2.86339	0.0381562	0.850758	0.698838	4.53525		49.46	0.04	8.48	0.11	0.06	40.91	0.46	99.61		91.2289
ROM-08B_OL23 - 1	100	1024.7	40.7069		0.819376	77.6656	35.5786	147.774	0.740863	25.658	3.72463	200.903	650.217	122.473	2866.7	1.07834	37.6178	< LOD	0.00395106	0.0012879	0.544589	0.623999	0.00218275		51.1	0.03	6.57	0.09	0.05	41.35	0.39	99.62		93.2822
ROM-08B_OL23 - 2	100	1022.34	40.5825		1.04678	76.413	35.0841	140.493	0.735551	26.0646	3.70271	200.14	650.883	122.702	2873.63	1.04138	38.1697	< LOD	0.00126462	0.00200179	0.543192	0.627393	0.000875468		51.12	0.02	6.53	0.09	0.03	41.67	0.4	99.89		93.3211
ROM-08B_OL23 - 3	100	1024.83	40.7138		0.89695	73.204	35.6062	152.478	0.742026	25.8628	3.75717	198.744	649.213	122.708	2877.81	1.05447	37.7859	< LOD	0.00136551	0.00171726	0.530387	0.624814	< LOD		51.1	0.03	6.57	0.09	0.05	41.35	0.39	99.62		93.2822
ROM-08B_OL23 - 4	100	1025.41	40.7443		1.0563	71.8981	35.7284	142.267	0.737396	26.1422	3.791	198.977	652.374	123.213	2884.03	1.03498	37.5463	< LOD	< LOD	0.00111967	0.529624	0.622982	< LOD		51.12	0.02	6.53	0.09	0.03	41.67	0.4	99.89		93.3211
ROM-08B_OL23 - 5	100	1026.41	40.797		1.30079	78.5627	35.9403	147.391	0.750065	25.3442	3.79564	200.113	654.283	123.865	2912.24	1.06021	37.8632	< LOD	< LOD	0.000921063	0.551907	0.646555	0.00136294		51.1	0.03	6.57	0.09	0.05	41.35	0.39	99.62		93.2822
ROM-08B_OL23 - 6	100	1026.72	40.813		1.14384	73.5281	36.0046	162.853	0.751973	25.6436	3.8265	201.142	657.035	123.808	2908.72	1.04469	38.1651	< LOD	0.0257346	0.00169586	0.540476	0.637453	0.00180395		51.12	0.02	6.53	0.09	0.03	41.67	0.4	99.89		93.3211
ROM-08B_OL23 - 7	100	1024.21	40.6811		1.25711	72.7892	35.4755	155.89	0.765195	26.5492	3.76548	199.513	656.758	123.925	2908.22	1.02261	37.7292	< LOD	0.00258676	0.00181237	0.542164	0.604731	0.000907052		51.1	0.03	6.57	0.09	0.05	41.35	0.39	99.62		93.2822
ROM-08B_OL23 - 8	100	1025.04	40.7246		1.21387	73.1197	35.6496	160.215	0.744019	26.6429	3.78102	199.438	656.682	123.98	2925.54	1.05719	37.8441	< LOD	0.0012351	0.00176431	0.547397	0.624871	< LOD		51.12	0.02	6.53	0.09	0.03	41.67	0.4	99.89		93.3211
ROM-08B_OL27 - 1	100	1101.5	44.7541		1.48023	102.609	54.657	238.397	1.02602	198.229	6.15862	260.48	742.745	132.817	3039.95	2.92361	45.3655	< LOD	0.00129102	0.00362167	0.272754	0.121468	< LOD		50.18	0.03	7.72	0.11	0.03	41.27	0.46	99.87		92.0563
ROM-08B_OL27 - 2	100	1101.99	44.7799		1.50501	102.756	54.7985	237.534	1.01318	196.275	6.18476	260.95	744.39	133.061	3055.45	2.99448	45.6021	< LOD	0.00117801	0.00447619	0.271001	0.114957	< LOD		50.18	0.03	7.72	0.11	0.03	41.27	0.46	99.87		92.0563
ROM-08B_OL27 - 3	100	1103.06	44.8364		1.59894	103.033	55.1088	239.418	1.00637	197.718	6.17261	260.32	743.466	132.677	3045.62	2.94126	45.5379	< LOD	0.000850202	0.00552524	0.276745	0.122958	< LOD		50.18	0.03	7.72	0.11	0.03	41.27	0.46	99.87		92.0563
ROM-08B_OL27 - 4	100	1102.85	44.8253		1.4762	103.422	55.0479	230.98	1.02649	196.896	6.17523	260.381	745.413	132.346	3048.02	2.9352	45.6606	< LOD	0.00168694	0.00394178	0.274681	0.124924	< LOD		50.18	0.03	7.72	0.11	0.03	41.27	0.46	99.87		92.0563
ROM-08B_OL27 - 5	100	1103.24	44.8457		1.65782	103.948	55.1604	238.278	1.02775	198.314	6.23272	260.393	744.205	132.801	3044.52	2.94564	45.6196	< LOD	< LOD	0.00435399	0.265191	0.127832	0.00135208		50.18	0.03	7.72	0.11	0.03	41.27	0.46	99.87		92.0563
ROM-34_OL2 - 1	100	993.643	39.07		1.58236	46.0623	29.4684	140.008	0.542614	29.5758	3.68374	115.275	657.489	133.673	3166.97	1.10905	41.118	< LOD	0.198146	0.000624145	0.363046	0.670843	0.00530253		50.77	0.02	7.2	0.07	0.03	41.31	0.43	99.85		92.6397
ROM-34_OL2 - 2	100	994.961	39.1395		1.79187	81.8439	29.7106	204.11	0.56734	30.6854	3.76491	112.36	658.502	133.386	3152.38	1.16245	41.8115	0.0859866	49.3521	0.0203226	0.506099	0.781484	1.48811		50.77	0.02	7.2	0.07	0.03	41.31	0.43	99.85		92.6397
ROM-34_OL3 - 1	100	1058.69	42.498		3.19141	94.095	43.2874	173.065	1.04367	61.1383	2.94562	275.487	544.29	104.293	2709.68	3.62763	27.857	< LOD	< LOD	0.00924455	0.764623	0.243265	< LOD		52.52	0.03	5.15	0.05	0.06	41.48	0.36	99.67		94.7897
ROM-34_OL3 - 2	100	1060.07	42.5705		3.43848	93.5881	43.6232	176.635	1.03953	51.4923	2.96317	275.314	541.81	104.741	2735.05	3.63552	27.8867	< LOD	< LOD	0.00845135	0.785749	0.225634	< LOD		52.52	0.03	5.15	0.05	0.06	41.48	0.36	99.67		94.7897
ROM-34_OL5 - 1 - 1	100	1119.5	45.7025		2.10503	137.998	60.0296	420.359	0.754705	133.407	5.33379	145.082	760.182	136.305	2926.69	2.6037	55.2665	0.242322	97.0277	0.054516	0.991531	0.520527	2.89744		49.47	0.02	8.62	0.1	0.02	40.57	0.38	99.21		91.0955
ROM-34_OL6 - 1	100	1386.27	59.7617		3.96948	185.786	189.838	541.065	1.22556	271.248	10.1755	171.507	926.314	142.606	2848.93	7.76987	72.2311	0.0779688	35.8024	0.050362	0.643459	0.154068	0.953678		47.93	0.04	10.33	0.13	0.03	40.43	0.41	99.41		89.2122
ROM-34_OL7 - 1	100	1010.9	39.9792		2.5322	68.0372	32.7567	211.689	0.946506	174.907	4.0472	138.081	875.88	124.649	2554.53	1.77327	55.6157	0.00570816	2.64795	0.00989102	0.699488	0.203437	0.077124		49.66	0.02	8.65	0.11	0.04	40.88	0.34	99.75		91.1039
ROM-34_OL9 - 2	100	862.408	32.1539		1.40965	12.1458	11.8625	80.7753	0.464078	1.94887	1.91097	34.3198	664.578	133.314	3135.48	0.100111	37.5983	< LOD	< LOD	< LOD	0.0250587	0.649351	< LOD		50.91	0.01	7.31	0.09	0.02	41.06	0.46	99.85		92.5481
ROM-34_OL10 - 1	100	903.072	34.2969		1.72648	24.9763	16.0715	87.7442	0.817003	4.45187	2.04807	51.6607	688.558	128.293	2921.03	0.0659628	37.0513	< LOD	0.762778	0.00369599	0.168885	3.19243	0.0115756		50.75	0.02	7.27	0.09	0.01	41.15	0.43	99.74		92.5621
ROM-34_OL10 - 2	100	907.778	34.5449		1.68714	26.7358	16.6239	104.556	0.836344	4.75921	2.08838	53.4855	692.481	128.269	2922.27	0.0767316	36.966	0.00486643	4.5989	0.00531267	0.179958	4.00183	0.110242		50.75	0.02	7.27	0.09	0.01	41.15	0.43	99.74		92.5621
ROM-34_OL11 - 1	100	993.248	39.0491		1.67558	44.2762	29.3961	142.69	0.556661	14.594	3.71919	115.36	667.507	131.901	3105.1	0.529233	41.2871	< LOD	0.0458651	0.00213227	0.428264	0.70397	< LOD		50.65	0.02	7.37	0.11	0.03	41.02	0.44	99.67		92.4511
ROM-34_OL12 - 1	100	1011.46	40.0088		1.46979	50.154	32.868	151.194	0.789108	55.9432	4.21663	161.616	734.922	132.352	2930.49	0.754512	42.1073	< LOD	0.0372439	0.0038059	0.540489	0.524727	0.00123444		50.39	0.02	7.76	0.1	0.02	41.14	0.4	99.87		92.0511
ROM-34_OL13 - 1	100	1047.73	41.9202		1.83106	52.0741	40.6782	203.412	0.795496	43.9606	6.49727	119.421	882.866	183.871	4198.95	0.821366	56.9051	< LOD	0.0748273	0.000573522	0.252656	1.25172	0.00173515		35.47	0.35	4.48	0.09	0.29	57.61	0.09	99.3		93.37			micro-xenolith
ROM-34_OL15 - 1	100	998.382	39.3197		1.35274	38.8324	30.3459	145.738	0.727257	33.3655	4.54116	139.894	685.582	131.053	3110.06	0.490449	39.8863	< LOD	< LOD	0.000841159	0.266197	0.410901	< LOD		50.71	0.03	7.34	0.11	0.06	41.16	0.45	99.89		92.4845
ROM-34_OL15 - 2	100	1001	39.4578		1.43148	39.3605	30.8394	148.499	0.714948	33.1655	4.53511	141.19	687.91	131.338	3126.54	0.501672	40.2474	< LOD	0.065172	0.000502166	0.291054	0.444808	< LOD		50.71	0.03	7.34	0.11	0.06	41.16	0.45	99.89		92.4845
ROM-34_OL17 - 1	100	1055.86	42.3488		1.85167	95.9628	42.602	179.425	0.757457	92.7867	5.97466	286.32	590.955	111.629	2644.26	1.51358	33.4892	< LOD	0.0658402	0.0041691	0.459793	0.237219	< LOD		51.52	0.02	6.08	0.07	0.04	41.53	0.36	99.7		93.7863
ROM-34_OL20 - 1	100	1078.13	43.5223		2.26451	80.6932	48.2105	192.43	0.783843	156.306	4.91079	140.984	765.206	131.071	2791.56	2.17281	51.0112	< LOD	0.0520347	0.0052154	0.361426	0.182434	< LOD		49.95	0.04	8.31	0.09	0.03	40.95	0.4	99.82		91.4629
ROM-34_OL21 - 1	100	1005.76	39.7085		3.23265	84.873	31.7504	224.286	0.914157	179.593	3.17642	136.578	838.442	115.478	2535.41	1.22493	50.6748	0.0248092	13.2043	0.0170342	0.879663	0.300155	0.371254		50.56	0.01	7.68	0.1	0.02	40.88	0.37	99.66		92.1478
ROM-97_OL2 - 1	100	1016.45	40.2718		2.32083	87.2033	33.8706	213.941	0.736957	168.711	4.54209	163.978	773.796	138.93	2966.04	1.32732	48.4982	0.0253224	17.182	0.0118287	0.480613	0.404171	0.452806		49.85	0.03	8.03	0.11	0.03	40.83	0.4	99.36		91.7144
ROM-97_OL3 - 1	100	867.575	32.4262		1.07137	10.4829	12.3441	89.9511	0.481231	1.72019	2.00611	35.5226	650.748	128.361	2997.29	0.0425038	34.0304	< LOD	0.0980583	< LOD	0.0557695	0.758413	0.0058372		50.95	0.03	6.83	0.09	0.01	41.1	0.41	99.47		93.0059
ROM-97_OL6 - 1	100	1031.77	41.0792		0.985127	65.3287	37.0903	154.911	0.523511	20.1326	3.47114	207.757	565.474	115.965	2793.31	1.10456	31.2419	< LOD	0.0744634	0.00200836	0.385781	0.521948	0.0123576		51.7	0.03	5.8	0.06	0.02	41.43	0.37	99.45		94.0779
ROM-97_OL6 - 2	100	1031.52	41.0659		< LOD	69.0472	37.0355	150.626	0.513597	20.1761	3.5675	209.889	562.809	115.257	2763.05	1.1052	31.514	< LOD	< LOD	0.00127361	0.413522	0.5422	< LOD		51.7	0.03	5.8	0.06	0.02	41.43	0.37	99.45		94.0779
ROM-97_OL7 - 1	100	970.069	37.8276		3.3697	92.6066	25.3816	176.469	1.16489	142.814	3.41637	213.145	909.123	124.268	2543.86	2.95663	42.2097	0.0105132	8.5633	0.00671193	0.46501	0.311368	0.208535		50.33	0.02	7.88	0.13	0.05	40.89	0.37	99.77		91.9202
ROM-97_OL7 - 2	100	970.79	37.8656		3.93792	88.3065	25.4998	166.211	1.16663	148.283	3.44112	213.631	905.699	123.852	2541.07	2.99837	42.357	0.00214749	1.61802	0.0039022	0.465271	0.296473	0.000584418		50.33	0.02	7.88	0.13	0.05	40.89	0.37	99.77		91.9202
ROM-97_OL10 - 1	70	1543.78	68.0624		< LOD	274.134	319.638	695.23	1.2744	127.861	13.1228	481.77	919.207	148.727	2719.2	9.22948	55.2187	0.00158543	0.00830204	0.0161946	0.230497	0.0238898	0.00107063		49.21	0.13	8.92	0.13	0.07	40.39	0.36	99.35		90.7758
ROM-97_OL10 - 2	70	1520.05	66.8116		< LOD	262.455	297.238	689.167	1.28973	127.324	13.3783	484.028	919.848	148.183	2716.48	9.03806	52.3564	< LOD	0.00786317	0.0149641	0.228026	0.021938	0.00232054		49.21	0.13	8.92	0.13	0.07	40.39	0.36	99.35		90.7758
ROM-97_OL11 - 1	100	1169.8	48.3535		2.57456	120.561	77.0538	333.656	1.01706	211.435	8.21467	275.44	885.856	139.798	2650.96	6.16316	58.0193	< LOD	0.094593	0.00484624	0.204662	0.0673825	0.00126698		48.67	0.06	9.64	0.12	0.05	40.43	0.36	99.43		90.004
ROM-97_OL11 - 2	100	1170.1	48.3691		2.58815	122.116	77.1633	336.957	1.03622	215.705	8.19418	275.515	886.881	140.135	2650.98	6.11608	57.4133	0.00655167	2.56451	0.00694617	0.214049	0.0742452	0.0623592		48.67	0.06	9.64	0.12	0.05	40.43	0.36	99.43		90.004
ROM-97_OL12 - 1	100	1181.46	48.968		3.43391	147.659	81.444	335.043	1.09612	223.249	7.55094	256.473	901.737	131.093	2710.68	6.15446	60.1058	0.00246742	5.04934	0.00903819	0.269742	0.0610665	0.343667		48.95	0.07	9.28	0.12	0.03	40.82	0.32	99.72		90.3919
ROM-97_OL12 - 2	100	1182.71	49.0336		3.23569	144.287	81.9226	325.739	1.09663	221.632	7.51217	257.647	897.209	131.214	2722.58	6.20752	59.7524	0.00343932	2.27665	0.00771346	0.265523	0.0628799	0.0275101		48.95	0.07	9.28	0.12	0.03	40.82	0.32	99.72		90.3919
ROM-97_OL14 - 1	100	1034.38	41.2167		1.90726	170.836	37.6601	530.899	1.22777	155.437	4.77295	178.744	806.731	126.947	2698.51	1.27404	39.3825	0.223838	274.099	0.100485	1.43475	1.40097	8.6285		50.65	0.06	7.61	0.11	0.03	40.96	0.38	99.9		92.2202
ROM-97_OL14 - 2	100	1014.55	40.1719		1.62745	58.8256	33.4871	183.382	1.22317	149.336	4.50207	175.613	800.423	125.376	2682.18	1.46515	38.6727	< LOD	2.55254	0.00296558	0.250355	0.439355	0.0322548		50.65	0.06	7.61	0.11	0.03	40.96	0.38	99.9		92.2202
Spinel-bearing peridotites (Mn > 1160 ppm and Al < 10 ppm)
ROM-08B_OL3 - 1	100	672.696	22.1561		2.84626	26.9792	2.03721	106.616	0.628221	8.03623	1.23756	48.3561	1185.68	131.715	2805.88	0.0902015	72.6883	< LOD	0.000968472	0.00472204	0.115829	0.876434	< LOD		49.15	0.02	9.28	0.17	0.02	41.19	0.36	100.24		90.4151
ROM-08B_OL3 - 2	100	725.325	24.9296		2.74733	27.2412	3.55178	94.6599	0.562003	1.72979	1.25233	45.1632	1181.24	131.419	2836.95	0.0932941	72.4945	< LOD	0.00115147	0.00528042	0.0784762	0.870182	0.000440541		49.02	0.02	9.19	0.17	0	41.13	0.38	99.94		90.488
ROM-08B_OL3 - 3	100	669.456	21.9853		3.00919	27.4554	1.96469	92.5091	0.645914	12.3019	1.27157	49.0652	1177.91	130.988	2741.05	0.0872524	71.8054	< LOD	0.00174153	0.00510875	0.13813	0.921692	0.00264139		49.15	0.02	9.28	0.17	0.02	41.19	0.36	100.24		90.4151
ROM-97_OL9 - 1	70	672.082	22.1237		0.594305	36.2503	2.0233	139.202	0.771477	113.715	1.86262	53.2663	1291.55	122.552	2543.71	0.239377	83.1607	< LOD	0.0027372	0.00523229	0.341198	3.55973	0.00552914		47.86	0.1	9.57	0.15	0.02	40.24	0.32	98.4		89.9125
ROM-97_OL9 - 2	70	845.402	31.2577		0.915941	146.446	10.3796	426.259	0.800836	131.369	2.2316	52.5906	1288.75	123.037	2552.46	0.465256	83.2957	0.253677	2.26599	0.0727413	2.31246	5.01985	5.14897		47.86	0.1	9.57	0.15	0.02	40.24	0.32	98.4		89.9125
Cr-rich megacrysts/ sheared peridotites? (Ca > 715 ppm)
ROM-05C_OL1 - 1	70	1330.91	56.8439		1.36108	190.209	154.273	763.473	1.16741	103.847	8.30264	224.513	841.276	119.228	3521.52	8.34874	54.7968	0.361488	3.4552	0.106157	2.47635	0.871602	5.30316		49.08	0.06	8.81	0.1	0.04	41.32	0.39	99.85		90.8502
ROM-05C_OL9 - 1	100	1529.62	67.316		1.82632	238.932	306.146	722.915	1.52919	156.282	10.9336	325.315	869.306	135.622	2782.62	7.76896	55.4253	< LOD	0.185584	0.019292	0.173505	0.0158013	0.0223198		49.32	0.1	9.06	0.11	0.06	41.07	0.4	100.21		90.6602
ROM-05C_OL20 - 1	70	1268.95	53.5787		1.39366	185.419	120.17	768.284	1.28483	215.491	7.80623	129.611	847.113	128.383	3702.13	6.38801	59.029	0.452987	3.50177	0.0811268	1.43098	0.85816	5.44408		48.87	0.04	9.37	0.1	0.03	41.22	0.35	100.05		90.2808
ROM-08B_OL18 - 2	70	1202.73	50.0889		1.57204	121.539	89.9021	830.642	1.5264	217.514	8.42206	289.405	897.603	116.586	3568.68	6.58469	51.9906	0.0123935	1.39495	0.00672954	0.185425	0.0835082	1.95751		49.58	0.05	8.62	0.1	0.04	41.22	0.4	100.12		91.1145
ROM-08B_OL22 - 2	100	1197.24	49.7996		1.83979	220.118	87.6622	1754.51	1.25789	333.174	7.74577	293.288	850.501	134.762	2893.11	5.7466	49.7037	0.791555	9.68699	0.0913291	1.83638	1.95966	9.46555		49.46	0.04	8.48	0.11	0.06	40.91	0.46	99.61		91.2289
Cr-poor olivine megacrysts
ROM-05C_OL10 - 1	70	874.117	32.771		2.88732	73.9976	12.9751	231.427	1.37279	130.612	3.15034	19.8891	1353.93	146.675	992.864	0.799594	148.716	< LOD	< LOD	0.00784909	0.669449	0.3638	0.0014086		42.78	0.02	17.66	0.19	0.02	39.25	0.11	100.07		81.1952
ROM-05C_OL13 - 1 - 1	70	1361.2	58.44		2.20318	198.017	173.113	548.527	1.35439	243.511	9.25257	105.411	869.044	145.522	3438.87	8.96708	87.3613	0.0905613	1.00552	0.0495542	0.876332	0.252531	1.36632		47.84	0.06	11.05	0.1	0.02	40.73	0.39	100.28		88.5285
ROM-05C_OL16 - 1	100	1362.51	58.5093		2.87956	195.515	173.965	478.282	1.48909	261.986	9.48433	19.6611	1029.1	188.969	1818.56	6.6976	132.87	< LOD	0.00434114	0.028324	0.291892	0.0353988	0.000867363		44.03	0.08	15.6	0.1	0	39.8	0.27	99.99		83.4146
ROM-05C_OL17 - 1	100	1468.99	64.121		2.8523	229.733	252.533	638.371	1.49896	210.984	10.4125	63.4699	946.445	181.352	2677.66	8.27599	118.109	< LOD	0.0130486	0.0340702	0.224727	0.0173368	0.00482655		45.55	0.08	13.89	0.12	0.01	40.11	0.37	100.21		85.3897
ROM-05C_OL18 - 1	100	1055.26	42.3173		3.04167	140.772	42.4584	260.787	1.14477	153.182	4.10289	149.941	1059.05	141.632	1849.64	1.65974	82.9736	0.0511995	0.428597	0.0120146	0.321792	0.166012	0.627603		46.91	0.03	12.17	0.14	0	40.56	0.22	100.07		87.296
ROM-05C_OL19 - 1	70	1134.63	46.5		2.84525	170.544	64.8331	725.738	1.56032	185.875	4.6795	2.6853	1239.77	187.974	391.773	3.13194	184.696	0.279047	2.96676	0.0831341	1.66588	0.614167	2.52986		41.47	0.06	19.06	0.15	0.01	39.51	0.04	100.38		79.4986
ROM-05C_OL21 - 1	100	885.576	33.3749		2.7238	93.1161	14.14	258.381	1.25552	134.839	3.25063	23.8268	1342.71	155.387	928.605	1.28401	131.83	0.0351492	0.458372	0.0185351	0.737149	0.419701	0.719243		43.28	0.03	16.56	0.16	0	39.51	0.12	99.67		82.3317
ROM-05C_OL21 - 2	100	1589.63	70.4784		2.92866	138.094	365.869	320.319	1.244	135.393	3.27799	24.0395	1335.91	155.457	931.869	3.5541	133.843	0.155549	1.6082	0.0310016	0.792136	0.565627	2.56742		43.28	0.03	16.56	0.16	0	39.51	0.12	99.67		82.3317
ROM-05C_OL23 - 1	70	1366.39	58.7135		2.70062	213.614	176.49	576.172	1.57996	235.086	10.2949	46.0017	967.496	184.399	2952.78	8.30133	128.476	0.0177482	0.140245	0.0367003	0.328522	0.0599845	0.164215		44.67	0.07	14.59	0.13	0	40.02	0.33	99.99		84.5172
ROM-05C_OL27 - 1	100	740.835	25.747		2.36403	52.3329	4.13814	207.413	1.23447	102.764	2.3562	19.1945	1458.76	146.927	890.491	0.33618	132.793	< LOD	0.00249835	0.00674554	0.466699	0.587388	0.00393811		43.51	0.05	16.38	0.18	0	39.62	0.12	99.89		82.5674
ROM-05C_OL27 - 2	100	749.457	26.2014		2.75834	75.947	4.496	325.478	1.24967	105.332	2.38752	18.9737	1441.61	145.79	886.908	0.331568	132.675	0.0733666	0.832563	0.0396162	0.702758	0.767184	1.17174		43.51	0.05	16.38	0.18	0	39.62	0.12	99.89		82.5674
ROM-05C_OL28 - 1	100	980.09	38.3557		1.78693	64.0048	27.0631	215.599	1.21196	184.983	4.89325	32.0765	1078	142.163	1238.44	1.57561	90.541	< LOD	0.00395175	0.00471919	0.429065	0.291699	0.00104707		46	0.03	13.17	0.16	0	40.53	0.19	100.12		86.1586
ROM-08B_OL1 - 1	100	982.494	38.4824		2.80826	78.2727	27.4787	254.521	1.26669	170.922	3.65958	38.9512	1227.21	152.621	1361.87	1.19944	139.681	0.0229331	0.178983	0.0138628	0.867512	0.401842	0.224551		43.66	0.05	16.3	0.17	0	39.57	0.19	100.02		82.6844
ROM-08B_OL2 - 1	100	821.738	30.0106		3.00181	80.2617	8.56015	227.376	1.27899	123.924	3.09593	17.4324	1360	153.256	673.65	0.715368	133.461	< LOD	0.0250222	0.00887014	0.613615	0.38948	0.0645467		42.92	0.03	17.34	0.16	0.01	39.46	0.1	100.06		81.5208
ROM-08B_OL4 - 1	100	1119.52	45.7035		1.31157	82.8972	60.0352	277.928	1.16123	203.444	7.1938	15.9242	900.712	151.23	941.055	3.07272	77.6876	0.00522387	0.00674491	0.00407389	0.271194	0.142355	0.00899798		46.89	0.05	12.59	0.13	0.01	40.49	0.16	100.39		86.9184
ROM-08B_OL13 - 1	70	1173.73	48.5604		2.4043	91.7052	78.5127	301.486	1.49636	135.289	3.0072	19.9824	1378.36	168.727	1057.45	1.46532	187.175	0.0785967	0.859593	0.0294066	1.13183	0.461151	1.1877		41.31	0.03	19.49	0.19	0	39.09	0.14	100.32		79.0711
ROM-08B_OL17 - 1	70	1315.67	56.0408		2.43362	185.604	145.342	496.79	1.49897	276.444	10.6057	165.591	922.347	121.609	3152.26	7.13754	90.4136	0.00965231	0.0468495	0.0257641	0.287336	0.041265	0.0525054		47.53	0.06	11.25	0.12	0.02	40.68	0.39	100.19		88.2834
ROM-08B_OL20 - 1	70	1427.63	61.941		2.50791	223.406	219.709	638.551	1.6169	206.002	10.3511	64.9205	937.331	179.317	3039.65	8.73238	122.973	< LOD	0.00904724	0.0330772	0.240503	0.0198379	0.000720814		45.43	0.08	13.8	0.1	0.02	40.17	0.35	100.05		85.4505
ROM-08B_OL20 - 2	70	1437.7	62.4716		2.10632	235.787	227.423	697.314	1.60367	225.567	10.569	65.3354	938.677	179.367	3022.3	8.93604	123.792	0.0715732	0.624944	0.0530713	0.514024	0.161324	0.871057		45.43	0.08	13.8	0.1	0.02	40.17	0.35	100.05		85.4505
ROM-08B_OL24 - 1	70	1348.75	57.784		2.43949	205.352	165.192	569.398	1.54879	237.313	10.3598	41.9854	968.253	186.199	2610.99	8.24027	131.346	< LOD	0.0194082	0.0281645	0.258661	0.0231139	0.015845		44.81	0.08	14.83	0.13	0.01	39.83	0.33	100.12		84.3377
ROM-08B_OL25 - 1	100	1040.96	41.5637		1.32797	66.677	39.1274	226.442	1.221	170.859	5.44529	26.5748	1011.29	142.065	1169	2.32934	82.6234	< LOD	0.00173424	0.00582332	0.358366	0.150481	0.00179099		46.65	0.03	12.16	0.12	0.01	40.6	0.15	99.78		87.2447
ROM-08B_OL25 - 2	100	1040.24	41.5255		1.52369	66.3575	38.9638	237.854	1.20849	173.072	5.4151	27.3221	1011.72	142.333	1182.07	2.15439	81.9472	< LOD	0.000960773	0.00603928	0.393753	0.162743	< LOD		47	0.04	12.49	0.12	0.01	40.54	0.14	100.41		87.0355
ROM-08B_OL25 - 3	100	1039.91	41.5083		1.60856	66.5041	38.8907	220.309	1.21429	173.142	5.4222	27.4133	1005.18	140.994	1182.03	2.1688	81.1686	< LOD	0.00122637	0.00728539	0.378943	0.175678	< LOD		46.65	0.03	12.16	0.12	0.01	40.6	0.15	99.78		87.2447
ROM-08B_OL25 - 4	100	1038.98	41.4591		1.5716	66.3954	38.6811	240.196	1.20973	175.188	5.42287	27.9197	1007.03	141.105	1191.91	2.16858	79.9896	< LOD	0.000787017	0.00602175	0.374627	0.171609	0.00088576		47	0.04	12.49	0.12	0.01	40.54	0.14	100.41		87.0355
ROM-08B_OL25 - 5	100	1039.64	41.4939		1.63469	66.0804	38.8293	232.351	1.19808	173.491	5.40737	27.4606	1008.91	141.759	1191.05	2.13994	81.0725	< LOD	0.0019326	0.00598664	0.377796	0.164006	< LOD		46.65	0.03	12.16	0.12	0.01	40.6	0.15	99.78		87.2447
ROM-08B_OL26 - 1	100	943.468	36.4258		3.10547	92.7852	21.2979	253.85	1.39164	136.061	2.97969	17.5468	1380.09	171.245	888.597	1.02154	175.042	< LOD	0.01125	0.0103414	0.809695	0.31189	0.0166297		41.27	0.04	19.68	0.18	0	39.24	0.11	100.6		78.8943
ROM-34_OL1 - 1	100	982.861	38.5018		2.17605	56.6421	27.5424	211.777	1.07632	166.246	5.01748	31.4993	1080.32	142.225	1284.91	1.46273	88.7544	< LOD	0.0585457	0.00718883	0.44077	0.231137	0.00123346		46.28	0.02	13.41	0.14	0.01	39.94	0.18	100.04		86.0231
ROM-34_OL4 - 1 - 1	100	1074.86	43.3499		1.98668	84.3235	47.3544	262.212	0.916332	174.585	5.72535	66.9799	909.237	131.938	1763.68	1.45825	72.1827	0.0352233	17.3893	0.0146772	0.396637	0.226884	0.554362		47.67	0.02	11.6	0.12	0.02	40.32	0.28	100.08		87.9864
ROM-34_OL4 - 2 - 1	100	1073.38	43.2723		2.30102	79.9486	46.9728	230.523	0.911942	180.382	5.70438	64.7853	906.526	133.004	1764.68	1.41898	73.4051	0.015542	6.49065	0.00966583	0.390126	0.18765	0.178056		47.67	0.02	11.6	0.12	0.02	40.32	0.28	100.08		87.9864
ROM-34_OL8 - 1 - 1	100	762.263	26.8762		3.58333	33.3104	5.07245	154.995	0.655338	52.8066	1.31264	34.2046	1268.79	129.165	2583.96	0.241566	107.604	< LOD	0.0617905	0.00774968	0.34087	1.97342	< LOD		47.1	0.03	11.89	0.15	0.04	40.34	0.34	99.93		87.5969
ROM-34_OL14 - 1	100	822.84	30.0687		3.38918	58.658	8.63889	212.084	1.13348	111.127	3.13272	17.011	1411.23	155.267	695.181	0.61681	142.755	< LOD	0.486366	0.00866379	0.53944	0.278411	0.0121061		42.72	0.03	17.84	0.21	0	39.1	0.1	100.03		81.0159
ROM-34_OL16 - 1	100	1107.85	45.0889		3.61207	103.298	56.5119	283.277	1.2221	162.571	4.40344	3.65835	1249.71	186.963	388.861	2.49378	176.202	< LOD	0.0370038	0.0182033	0.698933	0.126189	< LOD		41.67	0.02	19.17	0.16	0	38.98	0.05	100.11		79.4889
ROM-34_OL19 - 1	100	878.528	33.0034		3.50402	80.2399	13.4144	241.824	1.15129	124.25	3.45551	23.2337	1353.5	155.901	876.223	0.76106	133.256	0.0138923	9.18429	0.0101405	0.676164	0.27074	0.275011		43.15	0.02	17.5	0.18	0	39.14	0.13	100.18		81.4685
ROM-97_OL1 - 1	70	987.457	38.744		< LOD	63.1363	28.3516	220.364	0.874249	168.787	5.08054	29.4514	1080.31	170.698	1075.14	1.62716	88.3913	< LOD	0.00225478	0.00606686	0.58465	0.371128	0.0114415		46.17	0.05	12.91	0.14	0	40.07	0.14	99.56		86.4461
ROM-97_OL1 - 2	70	989.104	38.8308		< LOD	62.5821	28.6458	189.803	0.907405	171.733	4.99738	29.3229	1085.07	169.757	1066.95	1.63975	87.3937	< LOD	0.00290159	0.00571875	0.595862	0.408077	0.00534646		46.17	0.05	12.91	0.14	0	40.07	0.14	99.56		86.4461
ROM-97_OL1 - 3	70	995.23	39.1536		< LOD	67.7661	29.7602	219.102	0.912794	170.946	5.09528	29.8229	1079.33	169.976	1077.75	1.67196	87.6835	0.00194306	0.0145811	0.00717067	0.611445	0.379371	0.0403014		46.17	0.05	12.91	0.14	0	40.07	0.14	99.56		86.4461
ROM-97_OL4 - 1	100	949.111	36.7232		3.79119	81.8626	22.1195	245.921	1.13966	125.357	2.97775	22.5559	1362.53	167.68	932.984	1.05459	169.211	< LOD	0.606217	0.0132038	0.782174	0.305532	0.00515026		41.05	0.05	19.38	0.18	0	38.53	0.16	99.47		79.0631
ROM-97_OL5 - 1	100	1000.42	39.4274		4.26108	103.301	30.7301	197.726	1.06623	161.598	3.36745	109.377	1096.02	142.328	1848.98	1.42855	86.1501	< LOD	0.455873	0.00830437	0.405959	0.148133	0.000566869		46.18	0.04	13.08	0.15	0.02	39.78	0.23	99.54		86.2871
ROM-97_OL5 - 2	100	1002.34	39.5282		4.40363	105.864	31.0931	205.742	1.06701	161.462	3.36299	108.518	1095.79	141.869	1837.5	1.5822	86.8191	0.0043068	0.87407	0.0088573	0.410579	0.141336	< LOD		46.18	0.04	13.08	0.15	0.02	39.78	0.23	99.54		86.2871
ROM-97_OL8 - 1	100	1085.4	43.9054		2.1623	76.0439	50.1525	218.847	0.877174	191.14	5.7524	55.4595	890.988	135.352	1889.51	1.30564	69.3014	0.00289137	0.987323	0.0052668	0.336474	0.155746	0.0107525		48.2	0.05	10.7	0.12	0	40.34	0.27	99.76		88.9239
ROM-97_OL8 - 2	100	1087.67	44.0253		2.54419	79.2732	50.7718	242.54	0.873529	192.267	5.70334	55.1862	894.375	135.338	1887.47	1.33033	70.1797	0.00372064	1.62742	0.00597962	0.33114	0.167784	0.0214476		48.2	0.05	10.7	0.12	0	40.34	0.27	99.76		88.9239
ROM-97_OL13 - 1	100	1397.53	60.3551		3.87713	203.702	197.686	532.224	1.27354	247.92	10.5893	35.2503	1006.01	191.06	2107.37	7.46908	129.141	0.00177096	0.607469	0.0277021	0.252062	0.021601	< LOD		44.24	0.09	15.49	0.13	0	39.43	0.32	99.82		83.5845
ROM-97_OL13 - 2	100	1395.74	60.2605		3.85817	204.562	196.421	528.573	1.28888	248.139	10.5537	35.085	1004.67	190.673	2107.33	7.52478	128.35	< LOD	0.510185	0.0280507	0.262976	0.0252905	0.00687159		44.24	0.09	15.49	0.13	0	39.43	0.32	99.82		83.5845

## Sheet: Letseng
Dataset 1b. EPMA, LA-ICP-MS and Al-in-olivine thermometry data for Letseng kimberlite.
					LA-ICP-MS data done at Stellenbosch - See methods.																				EPMA data done at University of Joburg - See methods.
	Spot Size (µm)	T (°C)	P (kbars)		Li	Na	Al	Ca	Sc	Ti	V	Cr	Mn	Co	Ni	Cu	Zn	Rb	Sr	Y	Zr	Nb	Ba		MgO	CaO	FeO	MnO	Cr2O3	SiO2	NiO	Total		Mg#
Peridotitic olivine
Letseng-42-OL3-core1 - 1	100	1227.33	51.3851		0.833209	124.802	100.434	394.805	3.83104	166.792	6.23807	298.089	590.417	115.098	2815.94	2.84846	43.2496	0.0112927	0.114931	0.01413	0.196586	0.0301972	0.115956		50.55	0.07	7.62	0.1	0.02	41.23	0.36	100.04		92.2061
Letseng-42-OL5-core1 - 1	100	1311.83	55.8383		3.20477	206.288	143.147	493.868	3.79526	67.9359	7.374	538.342	836.748	142.093	2927.4	5.51539	63.8595	0.177978	1.57969	0.0320359	0.489944	0.243386	1.8498		48.79	0.08	9.72	0.12	0.09	40.71	0.38	99.97		89.9536
Letseng-42-OL6-core1 - 1	100	1238.01	51.9482		1.31588	148.978	105.266	386.368	3.92182	84.2463	7.49824	395.942	784.744	133.687	2951.65	3.12364	58.5086	0.017698	0.208306	0.0126674	0.151809	0.0474848	0.246106		50.95	0.08	7.43	0.1	0.07	40.91	0.42	100.02		92.4314
Letseng-42-OL7-core1 - 1	70	1329.72	56.7814		2.73639	175.727	153.565	584.75	5.76557	108.297	8.48479	470.688	908.903	145.528	3046.29	5.23469	78.7384	0.00716844	0.0659317	0.0109856	0.127426	0.0194635	0.0432813		49.29	0.08	9.5	0.12	0.06	40.96	0.39	100.49		90.2472
Letseng-42-OL8-core1 - 1	100	1048.15	41.9426		1.18667	143.629	40.7774	251.521	3.86466	197.327	4.43166	126.355	943.252	141.464	2921.22	2.29884	76.2472	0.169825	1.97045	0.0237627	0.542147	0.43247	2.13723		49.49	0.03	9.39	0.14	0	40.96	0.36	100.44		90.3778
Letseng-42-OL9-core1 - 1	100	1046.92	41.8778		0.800211	114.164	40.4914	199.349	3.87589	159.586	4.86895	183.329	760.659	143.576	3461.18	1.49749	54.736	0.0747792	1.00332	0.0141908	0.463828	0.402696	1.11472		50.44	0.03	7.64	0.11	0.03	41.2	0.46	100		92.1676
Letseng-42-OL11-core1 - 1	100	1233.97	51.735		0.983018	105.171	103.418	423.15	3.88972	44.4383	8.324	280.15	896.823	143.046	3027.1	4.99404	59.8853	< LOD	0.00754073	0.00686112	0.0866828	0.0147996	< LOD		49.73	0.06	8.72	0.12	0.04	40.73	0.41	99.85		91.0425
Letseng-42-OL13-core1 - 1	100	1031.94	41.0884		0.704249	81.4916	37.128	174.28	3.57331	56.5806	4.34213	179.776	710.598	137.925	3239.89	1.53992	51.8401	0.0140769	0.100723	0.00416293	0.470813	0.311693	0.108288		50.87	0.02	7.29	0.07	0.03	41.25	0.4	99.95		92.5558
Letseng-42-OL14-core1 - 1	100	1214.67	50.718		1.5967	134.413	94.9113	272.396	3.96462	195.41	7.53334	261.438	818.949	138.396	3202.05	1.24339	62.8406	< LOD	0.009703	0.0112073	0.315858	0.0614946	0.00636946		50.34	0.04	8.25	0.1	0.04	40.92	0.43	100.2		91.5847
Letseng-42-OL15-core1 - 1	100	1370.75	58.9437		3.11464	190.249	179.365	551.603	4.32236	129.327	8.98698	491.113	961.899	152.603	3129.65	4.34975	75.4245	< LOD	0.0498912	0.0142905	0.111741	0.0138685	0.0385739		48.07	0.11	10.49	0.11	0.04	40.59	0.37	99.84		89.0989
Letseng-42-OL16-core1 - 1	100	1111.54	45.2831		1.69875	140.57	57.6089	213.189	3.94201	173.095	6.52528	382.126	790.65	131.843	3065.52	3.38234	55.0807	< LOD	0.00183848	0.00451924	0.231438	0.0793416	0.00139952		51.22	0.04	7.16	0.1	0.06	41.3	0.42	100.36		92.7357
Letseng-42-OL17-core1 - 1	100	976.43	38.1629		0.256301	73.9104	26.4396	263.814	3.27692	17.1068	3.76268	151.982	716.777	140.284	3430.44	1.40549	48.9683	0.0966661	1.98392	0.0213812	0.41532	0.556979	2.11675		51.6	0.03	7.21	0.09	0.01	41.34	0.45	100.78		92.7232
Letseng-42-OL18-core1 - 1	100	1031.25	41.052		0.742048	77.6951	36.9781	158.58	3.58448	92.1266	5.33811	174.809	753.32	146.714	3508.57	0.58866	53.9777	< LOD	0.00683688	0.001722	0.300233	0.314574	0.00404544		50.62	0.03	7.6	0.07	0.01	41.39	0.48	100.26		92.23
Letseng-42-OL18-core2 - 1	100	1029.41	40.955		1.27026	78.5914	36.5808	157.449	3.57666	91.4882	5.37272	173.264	750.044	146.572	3499.49	0.570461	54.4502	< LOD	0.00270648	0.0019277	0.295455	0.314538	0.0087286											92.23
Letseng-42-OL19-core1 - 1	100	1204.18	50.1653		0.578762	130.465	90.5008	297.544	3.76425	83.568	7.3887	271.79	830.486	140.495	3141.24	4.87608	57.97	< LOD	0.00248472	0.00418839	0.133149	0.047691	0.00471216		50	0.05	7.96	0.1	0.04	40.91	0.43	99.55		91.8101
Letseng-42-OL19-core2 - 1	100	1200.99	49.9972		0.581841	131.532	89.1878	297.562	3.80336	83.3377	7.32435	271.384	826.056	140.199	3132.96	4.61435	57.1544	0.0088815	0.0516419	0.00442197	0.135844	0.0514488	0.0482325											91.81
Letseng-42-OL21-core1 - 1	100	1176.61	48.7122		0.745582	147.853	79.5954	296.299	4.27248	163.506	8.48325	475.475	911.33	144.462	3180.34	4.77071	57.4651	< LOD	0.00373192	0.00376318	0.158711	0.0612681	0.00494778		49.9	0.04	8.38	0.14	0.06	41.06	0.43	100.08		91.3947
Letseng-42-OL21-core2 - 1	100	1198.16	49.8481		0.739285	181.51	88.0352	392.614	4.26536	181.897	9.05881	482.199	919.551	144.937	3187.19	6.50289	58.3984	0.147101	1.45116	0.0206198	0.477995	0.279891	1.70471											91.39
Letseng-42-OL22-core1 - 1	100	1411.6	61.0963		1.71954	223.861	207.787	452.416	4.29537	195.793	10.121	441.62	919.876	147.4	2951.19	5.40263	80.627	< LOD	0.0174108	0.0160294	0.144343	0.0179205	0.00754407		48.38	0.09	10.04	0.11	0.08	40.64	0.41	99.85		89.5671
Letseng-42-OL23-core1 - 1	100	1003.72	39.6009		0.224236	52.0571	31.3571	208.665	3.14256	10.6847	3.94625	138.795	664.945	138.665	3487.03	0.726487	48.4144	0.0142647	0.352812	0.00545927	0.11404	0.822408	0.28418		51.01	0.02	6.88	0.09	0.02	41.03	0.47	99.54		92.9633
Letseng-42-OL23-core2 - 1	100	994.491	39.1147		0.437715	38.8316	29.624	175.228	3.13033	4.0013	3.97022	138.065	662.755	140.561	3545.62	0.7086	48.4841	0.00505913	0.0378249	0.000389798	0.0506336	0.796002	0.0389268											92.96
Letseng-42-OL24-core1 - 1	100	1037.47	41.3794		1.35889	87.8885	38.3431	159.764	4.04482	163.039	4.20037	192.905	863.327	144.156	3351.51	1.6233	57.9655	< LOD	0.00197517	0.00677443	0.680251	0.33851	0.00607769		50.2	0.02	8.26	0.13	0	41.05	0.4	100.16		91.5498
Letseng-42-OL24-core2 - 1	100	1040.24	41.5255		1.38242	88.8414	38.964	161.752	4.06167	165.214	4.24697	194.881	870.064	144.447	3362.2	1.73384	59.1515	< LOD	0.00282885	0.00656187	0.698818	0.334124	< LOD											91.55
Letseng-42-OL25-core1 - 1	70	1028.86	40.9261		1.33664	58.7129	36.463	236.735	4.93796	20.1404	4.32305	123.53	671.795	140.389	3336.27	1.20731	56.6017	0.0377614	0.855053	0.00955979	0.293272	0.543663	1.06574		50.79	0.04	7.53	0.1	0.02	41.05	0.45	100.01		92.326
Letseng-42-OL26-core1 - 1	70	1066.71	42.9205		1.95621	60.5827	45.271	243.289	6.59597	45.0789	2.7704	171.643	822.454	135.309	3389.04	0.664962	47.0075	0.0176657	0.215698	0.0165027	0.425632	0.138429	0.241078		50.96	0.05	7.15	0.12	0.01	41.15	0.48	99.95		92.7007
Letseng-42-OL26-core2 - 1	70	1067.71	42.9735		1.9679	114.777	45.5244	366.754	6.61959	46.4966	2.81846	172.649	823.319	135.273	3404.67	3.10515	47.7686	0.146298	2.10879	0.037158	0.567803	0.423413	1.90574											92.7
Letseng-42-OL27-core1 - 1	100	1375.52	59.1947		1.49621	206.26	182.537	547.954	4.25754	139.373	9.93157	424.078	958.664	153.902	3114.81	6.63213	80.8631	0.00710241	0.0449959	0.0134443	0.147544	0.0295797	0.0508369		48.18	0.08	10.12	0.15	0.1	40.64	0.43	99.81		89.4566
Letseng-42-OL28-core1 - 1	100	993.306	39.0522		0.738741	84.3233	29.4068	180.353	4.41939	129.916	3.38049	215.811	851.879	135.574	3577.82	1.52889	46.3709	< LOD	0.00896918	0.00445097	0.503433	0.202079	< LOD		50.96	0.03	7.24	0.1	0.02	41.24	0.48	100.11		92.6155
Letseng-42-OL28-core2 - 1	100	994.317	39.1055		0.808308	82.8536	29.592	189.385	4.40502	132.416	3.37801	215.082	847.737	134.15	3560.98	1.50809	45.9617	< LOD	0.000995072	0.00488655	0.524449	0.209659	< LOD											92.62
Letseng-42-OL28-core3 - 1	100	995.167	39.1503		0.847053	92.2455	29.7486	197.071	4.4646	131.336	3.40274	215.221	854.758	135.165	3578.75	1.57284	46.0184	0.0216947	0.35397	0.00930254	0.526843	0.252021	0.397092											92.62
Letseng-42-OL29-core1 - 1	100	1034.18	41.2062		0.567403	78.7865	37.6165	149.689	3.45158	96.3552	4.80281	162.563	717.395	138.987	3393.24	0.75839	52.6699	< LOD	0.00195365	0.00179589	0.340993	0.26295	0.00711559		50.88	0.03	7.38	0.09	0.02	40.86	0.42	99.75		92.4708
Letseng-42-OL29-core2 - 1	100	1063.48	42.7504		0.713176	129.743	44.4647	268.79	3.53046	117.159	4.88992	165.75	721.887	139.778	3405.27	0.793705	52.9935	0.086618	2.23772	0.0285687	1.3089	0.620366	2.32192											92.47
Letseng-42-OL34-core1 - 1	70	1041.73	41.6044		0.737953	75.1096	39.3021	187.219	5.03096	22.3014	4.88326	209.606	699.512	135.265	3109.46	0.669245	52.585	0.00357065	0.0337642	0.00566757	0.692513	0.452648	0.0482711		51.24	0.04	7.28	0.1	0.04	41.33	0.42	100.47		92.6169
Letseng-42-OL34-core2 - 1	70	1049.65	42.0214		0.791646	76.2118	41.1268	166.445	5.06584	22.7418	5.07639	214.586	707.188	136.386	3138.85	1.03241	53.915	< LOD	0.00660805	0.0057317	0.763282	0.461495	< LOD											92.62
Letseng-42-OL36-core1 - 1	100	1353.11	58.0137		0.871885	181.876	167.937	474.237	4.36998	114.96	9.75164	488.036	932.984	141.63	3015.04	4.9305	65.7809	0.0097103	0.0636132	0.00902629	0.104027	0.0306845	0.0818251		49.48	0.08	8.83	0.13	0.05	40.64	0.36	99.6		90.905
Letseng-42-OL40-core1 - 1	100	1014.08	40.147		2.77993	68.8066	33.3923	143.206	3.1775	21.0246	4.35817	115.74	702.18	138.579	3347.25	0.617059	50.6752	< LOD	0.020633	0.00202158	0.238948	0.604609	0.00600146		50.74	0.03	7.32	0.1	0.01	41.01	0.44	99.66		92.5134
Letseng-42-OL40-core2 - 1	70	1024.79	40.7112		2.25175	55.6453	35.5959	168.592	4.82113	21.6533	4.33152	116.96	684.106	136.935	3215.74	0.532007	54.7243	0.00421021	0.0702798	0.00123203	0.232932	0.579538	0.0400436											92.51
Letseng-42-OL42-core1 - 1	100	932.992	35.8737		0.413357	64.4476	19.834	192.244	3.26015	42.1123	3.05763	100.734	732.899	141.529	3239.8	0.523601	49.5299	0.0650849	1.69454	0.0249889	0.575264	0.741999	1.65642		50.37	0.02	7.6	0.08	0.02	41.02	0.4	99.54		92.1946
Letseng-42-OL43-core1 - 1	100	1024.52	40.6973		0.835382	66.6474	35.5404	195.504	3.33447	20.1767	5.24412	196.462	738.273	137.841	3287.53	1.55745	50.3098	0.0511936	0.586983	0.00660426	0.596611	0.502298	0.566378		50.9	0.03	7.22	0.08	0.02	41.21	0.43	99.92		92.621
Letseng-42-OL43-core2 - 1	100	1103.27	44.8473		1.72241	133.555	55.1691	420.732	3.29712	59.2202	5.66617	196.848	742.147	136.851	3269.09	2.40865	50.052	0.330471	3.76523	0.0492169	1.45946	1.00179	4.16153											92.62
Letseng-42-OL44-core1 - 1	100	1417.1	61.386		3.65146	216.483	211.827	603.494	4.24168	149.078	10.9906	333.174	938.026	155.843	3068.83	3.04665	84.1245	0.00538039	0.0325116	0.0203224	0.131155	0.0184949	0.039789		48.28	0.11	10.39	0.12	0.05	40.63	0.38	100.06		89.2222
Letseng-42-OL49-core1 - 1	100	1201.08	50.002		0.571032	121.976	89.2254	228.233	3.57414	91.21	6.48183	202	803.233	143.075	3129.6	2.904	60.6008	< LOD	0.00829696	0.00498978	0.0960633	0.0263267	< LOD		49.87	0.02	8.29	0.11	0.05	40.76	0.41	99.56		91.4741
Letseng-42-OL49-core2 - 1	100	1151.92	47.411		0.520361	121.543	70.6514	232.543	3.57743	89.8882	6.46074	202.236	804.558	142.956	3143.6	2.91823	61.3022	< LOD	0.0108681	0.00440824	0.0835569	0.0302123	0.0126829											91.47
Letseng-42-OL62-core1 - 1	100	1417.23	61.3928		5.20064	240.821	211.923	512.272	3.97826	137.663	10.5724	466.26	882.126	147.042	3133.09	5.04546	80.7482	0.00566532	0.00902645	0.0178568	0.132282	0.0147957	0.00463406		48.97	0.09	9.68	0.09	0.06	40.94	0.41	100.33		90.0111
Letseng-42-OL63-core1 - 1	70	1054.82	42.294		< LOD	55.4602	42.3527	225.396	4.87806	16.2125	3.9534	142.445	633.789	135.301	3256.12	0.702089	41.3873	0.0484744	0.578303	0.00557633	0.110236	0.844766	0.619608		51.04	0.03	6.79	0.07	0.02	41.6	0.46	100.04		93.0532
Letseng-42-OL63-core2 - 1	70	1059.87	42.56		< LOD	68.1942	43.5742	245.858	4.90239	20.0148	4.3592	148.889	648.532	140.705	3454.26	1.00895	51.6901	0.0933399	1.06798	0.0108938	0.252334	1.05353	1.18175											93.05
Letseng-42-OL66-core1 - 1	100	1353.8	58.0501		0.604916	183.524	168.376	491.315	4.28385	172.423	10.2975	492.401	964.658	145.141	2964.04	4.25769	64.432	0.00653379	0.0701196	0.0114225	0.165393	0.03398	0.071151		49.24	0.07	9.07	0.11	0.07	41.21	0.34	100.19		90.6339
Letseng-42-OL66-core2 - 1	100	1327.13	56.645		0.993122	186.816	152.027	481.034	4.22059	160.431	10.1124	467.408	963.63	147.377	3043.57	4.20844	66.8185	< LOD	0.0108418	0.0145845	0.152309	0.020635	0.0112218											90.63
Letseng-42-OL67-core1 - 1	100	1005.67	39.704		0.430176	98.6074	31.734	219.113	3.7886	88.268	3.59782	157.868	799.722	139.839	3280.92	0.58862	49.5808	0.0636974	1.13645	0.0197809	0.77131	0.763288	1.15892		50.97	0.03	7.5	0.08	0.02	41.28	0.41	100.32		92.3755
Letseng-42-OL67-core2 - 1	100	1038.53	41.4357		0.921433	178.557	38.5816	477.504	3.87062	106.491	3.68057	157.069	801.165	140.807	3307.91	0.759753	50.037	0.28896	5.17441	0.0792202	1.96859	1.26043	5.3633											92.38
Letseng-42-OL68-core1 - 1	100	1405.69	60.785		2.92776	214.617	203.505	500.632	4.12785	193.389	9.52291	351.861	890.328	146.667	2964.6	3.4279	84.3368	< LOD	0.0122279	0.0198368	0.204802	0.0229261	< LOD		48.56	0.07	9.77	0.12	0.04	40.93	0.36	99.94		89.8623
Letseng-42-OL70-core1 - 1	100	1415.76	61.3158		1.21686	232.553	210.843	549.932	4.15191	167.639	10.5229	450.009	965.228	152.232	3000.77	4.7687	82.2313	0.00964494	0.102284	0.0182401	0.157653	0.0530111	0.0995069		48.38	0.09	10.04	0.13	0.07	40.83	0.35	99.99		89.5791
Letseng-42-OL71-core1 - 1	100	1368.04	58.8007		3.82898	141.887	177.575	462.601	3.66144	50.5098	8.98701	340.105	867.289	150.181	3392.26	4.24977	68.5371	< LOD	0.0180554	0.0113709	0.154022	0.0254003	0.00686064		49.7	0.07	8.73	0.09	0.03	41.19	0.44	100.31		91.025
Letseng-42-OL72-core1 - 1	100	1440.91	62.641		1.47605	226.925	229.924	587.614	4.05243	131.547	10.91	218.976	929.065	157.034	3078.27	4.44322	82.0719	< LOD	0.0100369	0.0235285	0.112538	0.0107678	< LOD		48.29	0.1	10.26	0.13	0.04	41.19	0.41	100.5		89.3446
Letseng-42-OL75-core1 - 1	70	1255.26	52.8573		1.57812	200.486	113.408	571.022	5.44498	185.55	7.09915	417.434	723.153	121.366	2812.96	3.1985	53.5903	0.285633	3.4566	0.0454774	0.91366	0.427159	4.07906		49.52	0.1	8.63	0.11	0.05	41.28	0.4	100.19		91.0916
Letseng-42-OL76-core1 - 1	100	1044.54	41.7522		0.410457	83.7306	39.9418	176.509	3.26444	57.457	5.85441	166.088	708.788	143.946	3507.92	0.976508	50.9985	0.00877232	0.144292	0.00301663	0.288527	0.296918	0.105267		50.67	0.02	7.42	0.07	0.03	41.32	0.46	99.99		92.407
Letseng-42-OL77-core1 - 1	100	1331.5	56.8748		0.814738	158.052	154.624	416.693	4.13109	149.192	10.3789	327.082	940.124	145.218	3054.84	4.29723	65.1681	< LOD	0.00555874	0.00774113	0.1191	0.0244646	< LOD		49.3	0.07	8.87	0.13	0.06	41.18	0.37	100.02		90.8382
Letseng-42-OL80-core1 - 1	100	1375.93	59.2165		1.53206	229.252	182.814	460.166	4.14458	188.827	10.8863	445.685	857.802	145.981	3169.48	3.12104	70.6606	< LOD	0.0124198	0.0136802	0.117676	0.0121631	0.014463		50.07	0.08	8.15	0.1	0.04	41.1	0.43	100.05		91.6406
Letseng-42-OL81-core1 - 1	100	1336.02	57.1134		1.11564	167.879	157.352	431.52	3.95061	159.778	9.60096	348.251	904.183	149.277	3114.24	4.77783	76.8081	< LOD	0.00575259	0.00971322	0.132144	0.0233126	< LOD		48.8	0.07	9.77	0.09	0.07	41.17	0.38	100.47		89.9088
Letseng-42-OL83-core1 - 1	100	1010.34	39.9499		3.37193	70.0361	32.6465	153.655	3.36107	14.1933	4.74552	193.57	777.114	141.228	3298.24	0.894429	48.9777	< LOD	0.0288813	0.00101265	0.311655	0.557569	0.0295837		50.61	0.02	7.33	0.08	0.03	41.46	0.43	100.03		92.4831
Letseng-42-OL83-core2 - 1	100	1013.21	40.1014		0.706672	88.1491	33.2185	207.299	3.35614	13.9542	4.79706	192.601	775.989	140.428	3282.02	1.60485	48.7781	0.044689	1.13493	0.0117073	0.405237	0.671339	1.0551											92.48
Letseng-42-OL84-core1 - 1	100	1041.63	41.5991		0.945478	76.6162	39.2794	162.728	3.26343	51.1994	4.58675	126.345	739.314	143.616	2921.42	1.11097	57.8074	< LOD	0.00210303	0.00227568	0.305624	0.340209	< LOD		50.27	0.02	8.05	0.11	0.03	41.36	0.37	100.26		91.753
Letseng-42-OL84-core2 - 1	100	1038.65	41.442		1.32542	76.2189	38.6084	162.866	3.24469	51.2219	4.55375	126.873	738.951	143.449	2928.3	0.704673	57.9841	< LOD	0.0190157	0.00234584	0.295064	0.325661	0.00548326											91.75
Letseng-42-OL87-core1 - 1	100	1051.58	42.1235		3.73862	110.297	41.5828	257.891	4.01192	134.811	5.24999	169.905	955.933	137.038	2993.7	2.21497	67.5522	0.0578036	0.839204	0.013324	0.430203	0.315732	0.91042		51	0.03	6.97	0.07	0.01	41.7	0.42	100.24		92.8757
Letseng-42-OL88-core1 - 1	100	1457.84	63.533		1.11	269.572	243.385	633.297	3.94815	123.074	11.0413	294	888.735	148.683	3073.01	5.85739	78.6023	0.0636713	0.73183	0.0287913	0.222287	0.0802739	0.977123		48.6	0.09	9.49	0.1	0.05	40.96	0.38	99.78		90.1363
Letseng-42-OL89-core1 - 1	100	849.785	31.4887		0.454247	99.8067	10.7472	221.4	3.38658	68.6178	1.5906	68.6945	627.407	117.565	3036.95	0.513364	38.1242	0.149755	2.9397	0.0297268	0.352908	0.559389	2.77813		52	0.01	5.68	0.08	0.03	41.92	0.36	100.13		94.2329
Letseng-42-OL89-core2 - 1	100	886.246	33.4102		0.274876	26.4878	14.2105	94.2061	3.41324	66.7229	1.99934	68.6187	659.812	116.002	2978.54	0.498721	43.5709	0.00922214	0.189055	0.00832456	0.191316	0.342817	0.172134											94.23
Letseng-42-OL94-core1 - 1	100	1001.06	39.4608		0.234484	53.8884	30.8501	166.769	3.12162	11.3549	4.63716	197.11	749.833	139.684	3298.07	1.77646	49.0637	< LOD	0.00504265	0.00109983	0.333294	0.503956	0.00643436		50.84	0.03	7.18	0.07	0.03	41.61	0.42	100.22		92.6608
Letseng-42-OL94-core2 - 1	100	1000.45	39.4285		< LOD	53.2848	30.734	163.305	3.14181	11.0327	4.61212	194.585	746.459	139.437	3297.7	1.52611	49.0607	< LOD	0.00678212	0.00125727	0.353408	0.49176	0.00716198											92.66
Letseng-42-OL95-core1 - 1	100	1418.76	61.4737		1.33048	218.402	213.06	511.616	3.88686	132.884	11.183	177.816	910.864	153.643	3025.99	4.82508	80.5809	< LOD	0.0115085	0.0193503	0.129799	0.0120982	< LOD		48.23	0.09	9.92	0.12	0.02	40.65	0.38	99.53		89.6552
Letseng-42-OL96-core1 - 1	100	1271.45	53.7106		0.769589	95.863	121.436	421.033	3.37155	13.6473	8.04335	365.357	846.121	141.968	3197.23	4.12352	58.5236	< LOD	0.00584359	0.00208868	0.0238465	0.0244219	< LOD		49.94	0.06	8.12	0.09	0.05	41.37	0.42	100.07		91.642
Letseng-42-OL96-core2 - 1	100	1340.8	57.3651		1.1873	158.424	160.265	481.886	3.62725	62.841	9.0934	347.848	870.876	145.183	3156.26	4.89021	69.5336	< LOD	0.0252867	0.0115077	0.0865026	0.0240047	0.0164471											91.64
Letseng-42-OL98-core1 - 1	70	1349.68	57.8331		4.89142	174.445	165.776	599.029	5.66808	118.612	8.49469	441.682	902.957	150.316	3137.01	3.8634	78.5463	< LOD	0.00897453	0.00976805	0.0995615	0.0162874	< LOD		49.22	0.08	9.16	0.11	0.04	41.21	0.41	100.3		90.5468
Letseng-42-OL100-core1 - 1	100	1039.81	41.5027		0.400713	82.2264	38.8667	164.751	3.34777	90.2537	5.35958	174.479	750.047	145.041	3491.99	0.298671	52.4885	< LOD	0.0084888	0.00193488	0.308587	0.302799	0.00862974		50.69	0.02	7.43	0.1	0.03	41.63	0.44	100.36		92.3971
Letseng-42-OL103-core1 - 1	100	1498.32	65.6665		2.06591	272.349	277.637	606.341	4.12006	127.473	12.6573	200.905	940.661	160.303	3060.64	3.3147	90.1769	< LOD	0.0171132	0.0259048	0.0994032	0.0111926	0.00730671		47.99	0.1	10.41	0.12	0.04	41.02	0.39	100.13		89.1538
Letseng-42-OL106-core1 - 1	100	1449.82	63.1104		4.36794	267.099	236.945	645.393	4.23051	163.12	13.1288	87.2702	1053.15	189.033	2673.32	1.8975	128.343	< LOD	0.0171962	0.0318251	0.103923	0.00905935	0.00220764		50.69	0.03	7.17	0.1	0.02	41.46	0.41	99.9		92.6408
Cr-poor olivine megacrysts
Letseng-42-OL2-core1 - 1	100	1500.76	65.7953		1.41121	274.469	279.799	675.973	4.42518	152.407	12.3436	182.436	936.664	163.529	2975.57	6.33253	100.476	0.0560519	0.591957	0.0337006	0.250404	0.0953668	0.608346		47.36	0.11	11.55	0.11	0.03	40.51	0.38	100.17		87.9633
Letseng-42-OL10-core1 - 1	100	1488.94	65.172		1.51108	278.999	269.437	585.84	4.32253	142.44	12.5137	123.72	954.245	171.125	2777.44	4.40892	109.838	< LOD	0.0134503	0.0266191	0.0965494	0.0104263	0.0076654		46.73	0.07	11.97	0.12	0.01	40.35	0.35	99.82		87.4412
Letseng-42-OL12-core1 - 1	100	1399.82	60.4753		1.54199	214.175	199.302	592.021	4.48503	132.295	10.0663	439.802	948.069	152.232	3047.25	4.59394	77.1763	< LOD	0.0134633	0.0171865	0.128798	0.0124559	0.00813405		48.02	0.11	10.64	0.13	0.06	40.59	0.38	100.07		88.9459
Letseng-42-OL20-core1 - 1	100	1504.08	65.9701		1.85593	280.295	282.75	654.258	4.27745	128.493	11.3272	271.543	907.187	151.944	2933.88	5.97335	98.7007	< LOD	0.015015	0.0266035	0.106919	0.00721881	< LOD		47.93	0.1	10.71	0.12	0.04	40.42	0.35	99.86		88.866
Letseng-42-OL30-core1 - 1	100	1358.71	58.309		2.13382	208.822	171.511	550.587	4.25226	190.491	12.2807	51.755	1071.82	189.92	1981.39	3.97644	129.522	0.0205732	0.125443	0.0257861	0.204934	0.0486633	0.43197		44.95	0.08	14.77	0.12	0	39.63	0.24	99.86		84.4388
Letseng-42-OL31-core1 - 1	100	1411.89	61.1116		5.00507	232.824	207.999	465.02	4.12539	171.8	10.768	353.396	863.101	142.758	3044.06	2.43217	73.1253	< LOD	0.0365523	0.0159889	0.115147	0.0125306	0.0325975		47.9	0.1	10.84	0.14	0.05	40.36	0.36	99.83		88.7285
Letseng-42-OL32-core1 - 1	100	1392.3	60.0791		1.76504	223.674	194.01	556.677	4.22423	150.969	12.2816	70.3165	1021.25	183.595	2372.96	1.77657	125.283	< LOD	0.00919973	0.023808	0.107032	0.0113032	< LOD		45.32	0.09	13.74	0.13	0.02	39.99	0.28	99.62		85.4652
Letseng-42-OL33-core1 - 1	100	1373.37	59.0814		2.18379	240.608	181.101	595.508	4.25873	187.484	13.2241	43.715	1088.17	191.232	1923.88	5.65449	133.444	0.0908545	1.14828	0.0328962	0.260903	0.115304	1.16729		44.7	0.09	14.92	0.12	0.01	39.33	0.24	99.49		84.2281
Letseng-42-OL37-core1 - 1	100	1449.55	63.0965		3.59064	242.225	236.735	634.341	4.33165	150.677	10.2336	307.243	922.105	165.302	3179.63	2.64779	100.929	< LOD	0.0136956	0.0276485	0.136141	0.0086223	0.00635841		47.49	0.12	11.35	0.1	0.06	40.11	0.42	99.74		88.1779
Letseng-42-OL38-core1 - 1	100	1466.24	63.9759		2.21882	217.591	250.255	614.828	4.28401	154.546	10.6138	163.866	925.528	160.33	2959.93	2.87684	101.461	< LOD	0.0176851	0.026654	0.150627	0.0101968	0.0017109		47.56	0.09	11.35	0.12	0	40.44	0.37	100.03		88.196
Letseng-42-OL39-core1 - 1	100	1384.94	59.6914		1.1134	216.355	188.922	525.465	4.22307	184.607	12.6216	61.9327	1066.21	189.923	2135.12	1.81967	129.208	< LOD	0.0091678	0.0228798	0.118278	0.01026	< LOD		45.27	0.07	14.31	0.12	0	39.9	0.28	100		84.9424
Letseng-42-OL41-core1 - 1	100	1486.59	65.0485		2.70524	272.881	267.413	638.595	4.35502	145.067	13.6158	96.4657	1043.64	182.09	2365.8	2.5249	122.04	0.0309866	0.227012	0.0293929	0.106758	0.0176992	0.325503		45.87	0.09	13.34	0.13	0.01	40.03	0.3	99.84		85.9726
Letseng-42-OL45-core1 - 1	100	1425.94	61.8518		0.980614	233.372	218.43	592.573	4.20477	165.873	11.8697	338.87	950.865	160.91	2917.31	2.92148	87.2602	< LOD	0.0694073	0.0231965	0.12136	0.0173688	0.0602892		47.95	0.11	10.71	0.11	0.04	40.38	0.37	99.76		88.861
Letseng-42-OL46-core1 - 1	100	1495.71	65.5287		2.14802	237.866	275.337	712.535	4.38331	177.536	9.69195	99.3105	901.559	183.346	2918.79	4.0382	136.277	0.0131145	0.240843	0.0525858	0.192431	0.0264518	0.163938		46.43	0.11	12.94	0.1	0.01	39.9	0.39	99.94		86.4782
Letseng-42-OL46-core2 - 1	100	1494.59	65.4698		3.88113	228.584	274.357	732.064	4.3661	166.245	9.97614	93.3524	901.01	183.502	2867.9	0.906581	134.753	< LOD	0.0176563	0.048725	0.163165	0.00707518	0.00657855											86.48
Letseng-42-OL47-core1 - 1	100	1409.54	60.9877		2.61687	246.619	206.286	631.907	4.21948	176.757	12.7621	117.434	1070.21	185.697	2184.11	7.27985	119.175	0.0815404	1.30721	0.0443023	0.372509	0.173933	1.1426		45.22	0.09	14.31	0.14	0.02	39.89	0.29	100.03		84.9168
Letseng-42-OL48-core1 - 1	100	1357.06	58.2222		1.50033	180.601	170.456	471.021	4.25816	254.365	10.8294	353.926	1003.35	177.582	2249.25	5.09172	92.0304	0.00544509	0.0535459	0.0159142	0.23823	0.0509919	0.0577832		46.62	0.08	12.68	0.13	0.04	40.1	0.27	99.99		86.7564
Letseng-42-OL50-core1 - 1	100	1458.02	63.5426		0.656592	253.024	243.532	591.352	4.16289	142.126	12.4898	188.565	952.906	164.826	2941.57	4.44712	100.388	< LOD	0.012286	0.0241962	0.103129	0.00963962	0.00815373		46.44	0.09	11.63	0.14	0.04	40.38	0.4	99.17		87.6803
Letseng-42-OL51-core1 - 1	100	1355.96	58.164		3.40118	246.785	169.751	466.85	4.12146	216.454	11.9254	44.5359	1032.62	192.644	2405.32	1.34889	142.144	0.00657749	0.0821286	0.025295	0.199625	0.029955	0.0778674		44.98	0.09	14.82	0.13	0	39.63	0.29	100.08		84.4027
Letseng-42-OL61-core1 - 1	100	1416.05	61.331		4.81853	247.07	211.056	517.843	3.94564	132.872	10.3406	457.025	874.476	144.59	3155.07	4.98123	83.0712	< LOD	0.00934949	0.0186015	0.138955	0.015883	0.00386851		47.88	0.08	11	0.13	0.04	40.67	0.37	100.27		88.5828
Letseng-42-OL64-core1 - 1	100	1431.5	62.1449		1.9285	180.301	222.653	507.257	4.14977	188.01	9.75859	156.817	947.291	155.429	2784.17	4.48155	103.754	< LOD	0.0475349	0.0210874	0.161671	0.0141222	0.0336015		47.54	0.11	11.17	0.11	0.05	40.71	0.4	100.16		88.358
Letseng-42-OL65-core1 - 1	100	1408.32	60.9234		3.71663	216.976	205.402	542.871	4.15028	172.975	12.9356	75.9105	1044.28	186.653	2198.24	0.812182	122.257	< LOD	0.0193111	0.0244864	0.119901	0.00995436	0.00683877		45.27	0.08	14.05	0.14	0.01	39.94	0.26	99.84		85.1731
Letseng-42-OL69-core1 - 1	100	1432.12	62.1778		1.54609	230.133	223.131	574.71	4.13347	148.188	11.206	193.302	928.549	162.669	3011.94	3.26206	93.5414	< LOD	0.0223756	0.0225667	0.128837	0.0109477	0.0171571		47.96	0.09	10.64	0.1	0.06	40.8	0.38	100.17		88.9323
Letseng-42-OL73-core1 - 1	100	1390.58	59.9884		1.84096	239.552	192.812	591.005	4.12748	176.004	13.3755	47.2043	1084.16	191.541	1967.57	0.968495	133.41	< LOD	0.00934227	0.029665	0.118767	0.0100454	< LOD		44.51	0.11	14.74	0.11	0	39.87	0.25	99.71		84.3299
Letseng-42-OL74-core1 - 1	100	1298.21	55.1205		5.59016	147.206	135.548	573.613	4.38695	206.586	9.36799	332.187	1078.65	160.254	2508.59	1.62083	76.9972	< LOD	0.0362936	0.0180328	0.119829	0.0172538	0.0364475		46.95	0.08	11.48	0.14	0.05	40.65	0.32	99.75		87.9411
Letseng-42-OL78-core1 - 1	70	1468.15	64.0767		0.770758	250.604	251.836	705.166	5.90469	147.733	13.2167	85.1086	1021.15	177.963	1886.76	0.698193	135.241	< LOD	0.0129316	0.0306259	0.134965	0.00736622	< LOD		46.86	0.08	11.83	0.14	0.06	40.45	0.38	99.9		87.6021
Letseng-42-OL82-core1 - 1	100	1463.35	63.8238		1.20535	250.872	247.882	640.798	4.22449	151.431	11.882	310.095	933.165	160.704	3069.57	4.29014	95.3037	< LOD	0.0124772	0.0250707	0.11916	0.00844089	0.00519179		47.59	0.1	10.85	0.1	0.05	40.73	0.4	100.06		88.6658
Letseng-42-OL82-core2 - 1	70	1288.92	54.631		6.16919	131.564	130.528	512.551	5.87073	162.608	7.40578	386.561	994.96	159.071	2924.81	4.41174	84.5297	< LOD	0.012982	0.0129138	0.137666	0.0163245	0.011272											88.67
Letseng-42-OL82-core3 - 1	70	1465.48	63.936		3.11657	245.569	249.631	676.126	5.61939	122.874	11.2952	214.554	892.52	150.723	2834.03	2.01846	94.4158	< LOD	0.0424689	0.023745	0.11886	0.0126647	0.0385181											88.67
Letseng-42-OL85-core1 - 1	100	1448.52	63.042		2.47607	278.085	235.913	720.182	4.29952	133.867	14.5888	88.6717	1071.56	183.113	2339.73	0.35923	119.179	< LOD	0.0461042	0.0333039	0.120354	0.00688378	0.0166576		45.68	0.11	13.64	0.13	0.01	40.39	0.31	100.43		85.6527
Letseng-42-OL86-core1 - 1	100	1308.26	55.6505		1.46253	274.715	141.131	426.118	3.98442	215.688	9.7685	773.462	1021.29	158.013	2659.26	5.15743	89.9761	0.0456354	0.409204	0.012993	0.279732	0.0956024	0.426413		47.38	0.07	10.97	0.13	0.11	40.68	0.36	99.85		88.5006
Letseng-42-OL90-core1 - 1	70	1395.71	60.2591		4.33834	218.034	196.402	601.846	5.81734	168.489	10.9209	219.522	996.18	171.284	2763.3	2.09577	117.594	< LOD	0.0669896	0.0210497	0.162383	0.0129495	0.0530006		46.47	0.08	12.42	0.12	0.04	40.65	0.4	100.28		86.9655
Letseng-42-OL90-core2 - 1	70	1331.41	56.8703		7.34966	175.602	154.573	569.229	5.78979	160.674	8.55495	267.833	1012.62	166.424	2777.09	3.70808	103.442	0.0172555	0.157157	0.0186174	0.153835	0.0362858	0.1576											86.97
Letseng-42-OL92-core1 - 1	70	1329.23	56.7554		1.13324	110.465	153.271	469.486	5.90451	172.485	7.30858	340.887	980.856	158.879	2893.64	4.04309	81.4054	< LOD	0.00215889	0.0124983	0.144858	0.0196204	< LOD		47.83	0.06	10.89	0.12	0.04	40.9	0.35	100.3		88.6706
Letseng-42-OL101-core1 - 1	100	1146.04	47.1016		2.28493	112.509	68.635	262.709	3.77843	198.561	6.93168	141.607	1060.13	141.1	2903.83	1.3252	105.699	< LOD	0.0094952	0.0115336	0.348789	0.0858851	0.00941253		47.23	0.04	11.83	0.12	0.03	40.7	0.36	100.39		87.6744
Letseng-42-OL106-core2 - 1	100	1426.67	61.8903		2.17497	261.576	218.981	565.77	4.21833	181.213	13.0731	87.3579	1050.21	189.126	2666.23	6.20862	128.529	< LOD	0.0136504	0.0270848	0.13239	0.00761228	0.00311946		45.88	0.11	13.51	0.13	0.01	40.5	0.32	100.62		85.8261

## Sheet: Mothae
Dataset 1c. EPMA, LA-ICP-MS and Al-in-olivine thermometry data for Mothae kimberlite.
					LA-ICP-MS data done at Stellenbosch - See methods.																				EPMA data done at University of Joburg - See methods.
	Spot Size (µm)	T (°C)	P (kbars)		Li	Na	Al	Ca	Sc	Ti	V	Cr	Mn	Co	Ni	Cu	Zn	Rb	Sr	Y	Zr	Nb	Ba		MgO	CaO	FeO	MnO	Cr2O3	SiO2	NiO	Total		Mg#
Peridotitic olivine
AJE49a_OL2_core - 1	100	1223.83	51.201		1.31449	131.763	98.8881	374.736	1.89082	35.5737	7.0649	292.909	725.299	137.298	3295.68	4.60015	54.0687	0.0025419	0.00289893	0.00468744	0.15052	0.0583981	0.00221954		50.68	0.06	7.73	0.11	0.04	41.74	0.41	100.88		92.1006
AJE49a_OL2_core - 2	100	1221.07	51.0552		1.15242	129.557	97.6755	372.408	1.89778	35.7083	7.07406	293.539	723.446	137.774	3302.89	4.62612	54.1006	0.00104454	0.00392149	0.004468	0.160927	0.0739123	< LOD		50.68	0.06	7.73	0.11	0.04	41.74	0.41	100.88		92.1006
AJE49a_OL4_core - 1	100	1424.32	61.7665		2.06848	237.068	217.211	550.19	2.53627	167.442	11.2101	205.917	847.26	143.889	2908.72	5.58859	79.3968	< LOD	0.0125334	0.0252724	0.136354	0.014146	0.00544837		48.61	0.08	9.99	0.11	0.02	41.13	0.41	100.46		89.6564
AJE49a_OL4_core - 2	100	1426.41	61.8769		1.96302	235.952	218.789	555.513	2.54621	171.773	11.5352	211.847	847.897	143.738	2904.17	5.43324	79.765	< LOD	0.0136905	0.025702	0.136669	0.013404	0.00138936		48.61	0.08	9.99	0.11	0.02	41.13	0.41	100.46		89.6564
AJE49a_OL5_core - 1	100	1442.15	62.7065		1.87272	227.344	230.896	639.681	2.41644	58.6765	11.2941	278.224	829.968	141.019	2975.17	5.77993	68.391	< LOD	0.0103891	0.0147752	0.0367559	0.0124947	8.72234e-05		48.9	0.1	9.61	0.12	0.04	40.99	0.42	100.29		90.0601
AJE49a_OL5_core - 2	100	1442.6	62.7301		1.70814	229.472	231.245	643.295	2.4023	59.6793	11.4178	281.075	832.256	141.864	2985.01	5.7611	68.9444	< LOD	0.00959433	0.0156711	0.0340453	0.0122783	0.00112261		48.9	0.1	9.61	0.12	0.04	40.99	0.42	100.29		90.0601
AJE49a_OL6_core - 1	100	1395.81	60.2641		2.56879	240.169	196.469	505.901	2.563	198.18	12.0473	299.181	903.489	140.771	2950.17	5.08723	87.3277	< LOD	0.0142713	0.0214898	0.148828	0.0163156	0.00431722		48.14	0.09	10.57	0.12	0.04	41.27	0.37	100.71		89.0231
AJE49a_OL6_core - 2	100	1413.08	61.1741		2.71082	241.158	208.867	497.089	2.57846	196.526	11.8192	310.792	900.507	140.7	2939.36	5.08392	86.5219	< LOD	0.0104287	0.022217	0.151202	0.0186139	0.00153625		48.14	0.09	10.57	0.12	0.04	41.27	0.37	100.71		89.0231
AJE49a_OL8_core - 1	100	1200.76	49.985		1.02977	106.989	89.0932	337.339	1.65184	47.3851	6.03717	226.512	678.762	137.203	3425.58	3.76829	49.8833	0.00406214	0.0445476	0.00246537	0.144431	0.100027	0.0396835		50.52	0.05	7.36	0.08	0.05	41.86	0.49	100.48		92.4555
AJE49a_OL8_core - 2	100	1194.16	49.6373		1.0785	112.019	86.4231	319.716	1.67753	45.3298	5.90896	223.406	672.479	138.911	3492.78	3.95343	50.3344	0.00283327	0.0391468	0.00195627	0.137039	0.0968995	0.0295093		50.52	0.05	7.36	0.08	0.05	41.86	0.49	100.48		92.4555
AJE49a_OL11_core - 1	100	1282.57	54.2964		1.73145	283.163	127.171	421.498	2.63429	197.235	9.9447	720.966	914.952	137.124	2918.26	8.53453	63.1297	0.00412277	0.0320288	0.0114191	0.203894	0.042438	0.0243104		49.26	0.06	9.11	0.13	0.13	41.46	0.41	100.65		90.5861
AJE49a_OL11_core - 2	100	1295.14	54.9587		1.80277	270.881	133.874	418.551	2.73774	203.119	10.2481	735.071	923.766	135.233	2846.37	7.74187	62.6099	0.00172483	0.0228894	0.0106983	0.196904	0.0402475	0.0171975		49.26	0.06	9.11	0.13	0.13	41.46	0.41	100.65		90.5861
AJE49a_OL12_core - 1	100	1450.48	63.1452		2.08376	243.916	237.471	680.804	2.58526	127.061	11.3234	332.936	849.231	146.208	2955.02	5.29905	79.5701	0.00160175	0.025965	0.0259642	0.122574	0.0138953	0.0200745		48.96	0.09	9.82	0.11	0.03	41.24	0.42	100.75		89.8761
AJE49a_OL17_core_pheno - 1	70	1356.47	58.1909		1.89216	176.705	170.076	466.474	3.27345	158.7	9.30169	367.884	875.552	142.836	2896.52	4.819	69.2672	< LOD	0.00858577	0.0104532	0.128472	0.0220066	< LOD		48.91	0.1	9.63	0.13	0.09	41.23	0.38	100.54		90.0709
AJE49a_OL22_core - 1	100	1070.9	43.1412		1.22976	75.9289	46.3334	205.995	1.84748	94.2016	4.61753	148.371	783.651	139.824	2804.79	1.29136	76.8374	0.000960407	0.0149314	0.00348619	0.367877	0.354708	0.00374626		48.98	0.03	9.59	0.1	0.05	41.42	0.34	100.53		90.1099
AJE49a_OL25_core - 1	100	1326.79	56.6269		1.79194	187.916	151.824	471.482	2.38858	266.104	10.9192	348.477	847.308	138.371	3454.17	4.64049	60.7083	0.00412145	0.0586578	0.0213253	0.218256	0.0351345	0.0485097		49.85	0.07	8.53	0.12	0.05	41.48	0.45	100.65		91.2442
AJE49a_OL26_core - 1	100	1325.19	56.5424		1.28301	181.622	150.877	509.561	2.34632	83.7833	9.69669	385.099	843.454	136.104	3073.11	5.64987	54.9739	0.000934321	0.00579819	0.0108625	0.0948889	0.0239347	< LOD		49.82	0.08	8.57	0.11	0.07	41.62	0.43	100.81		91.1932
AJE49a_OL28_core - 1	100	1050.28	42.0546		0.810036	182.024	41.2748	350.499	1.8625	45.5437	4.2396	196.304	629.325	131.147	3400.83	0.789994	41.6668	0.288482	5.00944	0.0557922	1.07827	1.31129	5.15461		51.66	0.02	6.44	0.05	0.05	42.1	0.47	100.83		93.4752
AJE49a_OL29_core - 1	70	1075.93	43.4064		0.340168	83.629	47.6337	221.518	2.16306	16.1922	4.81154	201.659	658.244	127.54	3127.02	1.0861	43.0205	0.0576096	0.775782	0.0136303	0.355302	0.686732	0.833399		51.06	0.06	7.32	0.08	0.04	41.67	0.46	100.78		92.5389
AJE49a_OL29_core - 2	70	1043.86	41.7165		0.7952	77.285	39.7868	164.304	2.01087	7.00251	4.59583	199.597	655.473	130.075	3213.39	1.03118	43.8403	0.0132468	0.13564	0.00278448	0.232131	0.544368	0.138595		51.06	0.06	7.32	0.08	0.04	41.67	0.46	100.78		92.5389
AJE49a_OL31_core - 1	100	1115.01	45.4659		1.47171	79.0826	58.6549	291.365	1.8839	147.713	5.43826	155.069	765.964	134.349	3124.03	1.97309	59.6408	0.00105755	0.00819852	0.00504811	0.240982	0.0645782	0.00511891		49.96	0.06	8.48	0.11	0.04	41.44	0.44	100.59		91.2951
AJE49a_OL32_core - 1	100	1265.15	53.3782		1.74975	100.486	118.263	431.585	1.66986	40.0213	6.60941	291.403	763.264	136.837	3103.72	4.47321	67.764	0.0492009	0.523222	0.0193557	0.183079	0.116926	0.500986		49.9	0.05	8.62	0.09	0.03	41.62	0.44	100.82		91.1733
AJE49a_OL35_core - 1	100	1134.7	46.504		1.87592	88.9684	64.8578	236.863	2.05323	151.674	4.36343	171.79	839.671	130.833	2942.52	2.83698	63.4868	0.0159779	0.306107	0.00827763	0.492446	0.22368	0.0491869		50.01	0.04	8.61	0.11	0.03	41.49	0.37	100.74		91.1952
AJE49a_OL35_core - 2	100	1143.18	46.9504		1.73136	89.7797	67.6654	195.97	2.06641	150.198	4.0474	171.28	835.405	130.378	2922.95	2.76013	62.5858	0.00723037	0.146527	0.0076012	0.445925	0.218524	0.103228		50.01	0.04	8.61	0.11	0.03	41.49	0.37	100.74		91.1952
AJE49a_OL36_core - 1	100	1042.48	41.6439		1.2422	71.1444	39.4724	184.019	1.47306	6.8006	4.27953	213.424	729.138	139.525	3257.53	2.35516	52.3924	0.00137273	0.00336907	0.00249857	0.40498	0.820292	0.000233306		51.01	0.04	7.66	0.11	0.02	41.83	0.42	101.16		92.2207
AJE49a_OL36_core - 2	100	1046.02	41.8301		1.09594	73.7874	40.2822	193.567	1.44663	6.67384	4.28479	213.946	729.652	139.639	3258.32	2.32063	52.6132	0.00315836	0.0499568	0.00237419	0.417991	0.844977	0.0424986		51.05	0.05	7.67	0.1	0.03	41.75	0.42	101.11		92.2289
AJE49a_OL37_core - 1	100	1251.89	52.6795		1.27768	146.103	111.782	420.576	2.53966	106.04	9.69177	369.54	858.627	137.628	3031.82	4.70772	59.8482	< LOD	0.00759739	0.00473985	0.102964	0.0377797	0.00254878		49.82	0.06	8.82	0.11	0.08	41.52	0.4	100.92		90.9671
AJE49a_OL38_core - 1	100	1200.95	49.995		1.45548	138.513	89.1706	350.195	2.03352	79.5893	7.64107	324.685	753.861	133.08	3023.73	4.34722	55.1392	< LOD	0.0039101	0.00385447	0.0759331	0.0535682	< LOD		50.32	0.06	8.22	0.09	0.06	41.6	0.4	100.82		91.6106
AJE49a_OL38_core - 2	100	1202.55	50.0795		1.411	138.932	89.8288	351.219	2.06035	79.8228	7.70431	326.914	753.873	133.248	3017.97	4.38981	54.6389	< LOD	0.00465881	0.00394139	0.0771649	0.0609402	< LOD		50.32	0.06	8.22	0.09	0.06	41.6	0.4	100.82		91.6106
AJE49a_OL42_core - 1	70	1030.36	41.005		0.500643	47.3327	36.7853	192.878	2.40926	188.829	5.60891	85.7669	699.749	132.055	2644.37	1.04346	53.601	0.0114433	0.181291	0.00479717	0.162281	0.0379403	0.169024		50.27	0.03	8.27	0.12	0.02	41.55	0.37	100.71		91.5488
AJE49a_OL42_core - 2	70	1084.44	43.8549		0.596448	143.769	49.8935	409.171	2.39967	203.722	5.94342	85.4439	697.677	131.13	2627.83	1.27025	53.3332	0.368578	4.23155	0.0554142	0.676585	0.344278	4.77088		50.27	0.03	8.27	0.12	0.02	41.55	0.37	100.71		91.5488
AJE49a_OL43_core - 1	100	1048.53	41.9626		1.00847	63.3452	40.8658	188.815	1.40415	8.23657	5.49622	213.04	683.488	134.756	3261.65	2.15343	47.723	0.00139971	0.0139161	0.000183562	0.143846	0.391433	0.0114416		51.27	0.02	7.08	0.09	0.02	41.92	0.43	100.9		92.8116
AJE49a_OL44_core - 1	70	1086.15	43.945		1.37157	162.589	50.3566	459.814	3.35136	141.805	4.05085	261.992	765.039	129.597	2985.11	1.29472	46.9473	0.181478	6.23664	0.0605388	1.50916	1.31678	6.97361		50.79	0.03	7.27	0.1	0.05	42.03	0.38	100.71		92.5702
AJE49a_OL44_core - 2	100	1081.15	43.6818		1.67552	150.764	49.0124	403.934	2.76918	137.605	4.11404	245.67	764.576	129.726	2968.68	1.28593	49.3121	0.153461	5.41048	0.0516058	1.12236	1.14512	5.9801		50.79	0.03	7.27	0.1	0.05	42.03	0.38	100.71		92.5702
AJE49a_OL45_core - 1	100	1060.77	42.6078		1.14454	78.4212	43.7966	176.255	1.98693	129.417	5.29677	166.495	737.482	132.541	2755	1.09186	58.2019	< LOD	0.00697621	0.00280532	0.455189	0.38477	0.00190082		50.27	0.03	8.26	0.09	0.05	41.34	0.39	100.52		91.5637
AJE49a_OL45_core - 2	100	1057.93	42.4579		1.03878	75.6525	43.1022	179.111	1.96322	129.515	5.26475	165.796	736.372	132.305	2753.9	0.91417	56.9412	< LOD	0.0392135	0.00352275	0.486117	0.399396	0.0148013		50.27	0.03	8.26	0.09	0.05	41.34	0.39	100.52		91.5637
AJE49a_OL46_core - 1	100	1440.84	62.6375		2.0964	241.609	229.871	533.591	2.48493	181.075	10.3911	397.399	839.516	142.901	2988.49	5.58585	85.7393	0.00327084	0.0204465	0.0220741	0.127758	0.017416	0.0130001		48.99	0.06	10.15	0.11	0.07	41.27	0.41	101.16		89.604
AJE49a_OL47_core - 1	100	1450.74	63.1587		1.79878	271.342	237.676	605.771	2.36003	139.519	11.1128	250.585	819.57	143.328	2942.34	4.95626	73.9355	0.000831637	0.00996331	0.0260162	0.123388	0.0111348	0.00157554		49.07	0.09	9.65	0.12	0.05	41.36	0.39	100.84		90.0744
AJE49a_OL49_core - 1	100	1103.53	44.8612		1.26992	81.5843	55.2457	205.581	1.79442	80.603	5.24462	210.087	702.323	131.719	3082.54	1.23785	46.3344	< LOD	0.0149215	0.00175927	0.37408	0.229691	0.00238149		50.98	0.04	7.19	0.12	0.03	41.86	0.41	100.69		92.6622
AJE49a_OL52_core - 1	100	1317.06	56.114		1.53563	185.805	146.141	404.398	2.5181	172.129	9.79931	468.322	843.882	136.594	3057.85	5.35659	60.9217	< LOD	0.00845115	0.00997832	0.182871	0.03173	0.00170149		49.97	0.08	8.63	0.1	0.08	41.25	0.43	100.65		91.1692
AJE49a_OL52_core - 2	100	1316.54	56.0869		1.65024	186.601	145.844	404.852	2.51529	171.22	9.79125	469.102	840.674	136.657	3053.83	5.27569	59.3829	< LOD	0.0110681	0.00915368	0.184749	0.0345341	0.00113181		49.97	0.08	8.63	0.1	0.08	41.25	0.43	100.65		91.1692
AJE49a_OL53_core - 1	100	1044.83	41.7675		1.052	85.4687	40.0087	235.596	1.50205	77.525	4.76929	141.897	638.75	133.358	3331.3	0.900004	46.695	0.0324906	3.0577	0.0259034	1.01766	1.07537	2.5737		51.24	0.03	7.27	0.07	0.02	41.66	0.47	100.78		92.6253
AJE49a_OL53_core - 2	100	1032.75	41.131		1.04556	67.3544	37.3042	167.456	1.45752	76.6003	4.73603	141.647	640.104	133.755	3351.53	0.884673	48.1485	0.00907651	0.367662	0.00559332	0.620167	0.643879	0.35732		51.24	0.03	7.27	0.07	0.02	41.66	0.47	100.78		92.6253
AJE49a_OL53_core - 3	100	1035.04	41.2515		0.99941	94.9501	37.8057	243.575	1.45291	76.982	4.81003	142.788	640.465	134.116	3353.07	0.931759	48.2688	0.0400746	3.81546	0.0241439	0.862962	1.05219	3.73433		51.24	0.03	7.27	0.07	0.02	41.66	0.47	100.78		92.6253
AJE49a_OL54_core - 1	100	1338.2	57.228		2.11137	221.566	158.673	479.655	2.28372	190.216	10.7511	382.679	851.021	134.509	2966.73	4.84206	70.2209	< LOD	0.0135363	0.0199399	0.123676	0.0191952	0.0102566		49.35	0.07	9.35	0.12	0.06	41.12	0.41	100.6		90.3887
AJE49a_OL55_core - 1	100	1047.11	41.8879		1.12031	60.7289	40.5362	259.249	1.28688	13.0222	5.09001	161.448	690.85	134.699	3185.43	2.34326	50.4567	0.0732884	1.09428	0.0135607	0.354666	0.416346	1.05257		50.64	0.03	7.88	0.09	0.03	41.7	0.42	100.82		91.9731
AJE49a_OL56_core - 1	100	1484.15	64.9196		2.21623	264.957	265.313	683.963	2.479	94.9652	11.3987	226.257	832.042	150.644	2990.07	5.9864	88.8335	0.00126389	0.0163883	0.0253086	0.0699334	0.0092646	0.000657232		48.67	0.11	10.32	0.11	0.06	40.9	0.42	100.71		89.3715
AJE49a_OL57_core - 1	100	1294.5	54.9249		1.66077	173.445	133.526	613.322	2.23676	136.587	10.8593	320.636	841.522	138.828	2862	5.51154	64.8581	0.232322	1.72771	0.0210687	0.250835	0.358202	2.23789		49.27	0.07	9.24	0.11	0.06	41.59	0.4	100.83		90.4762
AJE49a_OL58_core - 1	100	1088.7	44.0793		1.93448	87.4046	51.0526	191.83	1.66668	184.345	5.06117	184.176	721.83	132.062	3204.08	2.41304	59.8656	0.00383052	0.0726775	0.0040966	0.242575	0.0396301	0.0708862		49.77	0.05	8.6	0.09	0.03	41.42	0.39	100.41		91.1827
AJE49a_OL59_core - 1	100	1227.07	51.3716		1.21599	162.012	100.32	443.498	2.31584	61.2191	8.89337	413.578	868.938	133.447	2944.66	4.13911	55.8458	< LOD	0.00679802	0.009583	0.111404	0.018757	0.00130725		50.03	0.07	8.6	0.11	0.05	41.27	0.42	100.63		91.2107
AJE49a_OL59_core - 2	100	1262.14	53.2195		1.1264	174.257	116.769	478.333	2.31316	79.6782	9.04862	413.035	867.999	133.327	2936.97	4.0238	56.5947	< LOD	0.00673015	0.013752	0.150211	0.0239648	0.000248934		50.03	0.07	8.6	0.11	0.05	41.27	0.42	100.63		91.2107
AJE49a_OL60_core - 1	100	1280.76	54.2011		1.19886	158.572	126.225	430.538	2.19348	167.004	8.80579	377.972	770.056	134.602	3038.51	3.10256	54.6777	< LOD	0.00604407	0.014757	0.219732	0.0328723	0.000785936		50.1	0.07	8.13	0.09	0.06	41.57	0.38	100.5		91.6637
AJE49a_OL62_core - 1	100	1021.09	40.5163		1.70895	75.3523	34.8228	227.391	3.66451	89.2534	3.04503	175.728	863.723	144.324	3679.82	1.98354	47.3426	0.00120885	0.00369029	0.00599618	0.542209	0.280436	0.00076686		50.33	0.04	7.79	0.11	0.03	41.88	0.49	100.72		92.0014
AJE49a_OL62_core - 2	100	1019.15	40.4142		1.79039	82.3873	34.423	252.627	3.68999	90.016	3.01088	175.832	859.717	144.355	3688.21	1.95432	48.2756	0.0147574	0.36645	0.0111425	0.593778	0.325801	0.245541		50.33	0.04	7.79	0.11	0.03	41.88	0.49	100.72		92.0014
AJE49a_OL64_core - 1	100	1170.63	48.3973		0.91306	28.7915	77.3607	431.148	1.60461	0.360601	8.07414	359.927	802.705	135.544	3063.62	1.78056	54.9493	0.00204964	0.0654848	0.000604106	0.00301386	0.0528426	0.0138924		50.21	0.05	8.3	0.12	0.06	41.62	0.41	100.78		91.5044
AJE49a_OL64_core - 2	100	1162.47	47.9674		1.125	29.2512	74.3831	435.016	1.58886	0.210062	8.10108	359.023	804.702	135.602	3060.28	1.63626	53.6491	0.00135874	0.100218	0.00011608	0.00291943	0.0533479	0.00633388		50.21	0.05	8.3	0.12	0.06	41.62	0.41	100.78		91.5044
AJE49a_OL67_core - 1	100	1054.78	42.2919		0.890663	68.3048	42.3428	185.09	1.41281	20.1903	5.09073	198.41	683.152	136.547	3310.47	1.8007	48.6863	0.0010047	0.00565509	0.00296074	0.495832	0.646026	0.00546103		51.36	0.03	7.19	0.08	0.02	41.8	0.43	100.97		92.7234
AJE49a_OL67_core - 2	100	1050.1	42.0454		0.969994	71.0955	41.2334	189.147	1.42452	19.7047	5.06033	198.772	682.895	135.862	3295.06	1.83108	49.1569	0.00705069	0.171983	0.00258696	0.494322	0.646323	0.129921		51.36	0.03	7.19	0.08	0.02	41.8	0.43	100.97		92.7234
AJE49a_OL69_core - 1	100	1422.01	61.6451		2.27213	242.126	215.483	523.65	2.46961	186.889	10.9698	388.872	855.457	142.428	2939.68	5.1578	80.3272	< LOD	0.0100039	0.0216304	0.145968	0.0191118	0.0022617		48.69	0.08	10.15	0.11	0.07	41.14	0.38	100.73		89.5221
AJE49a_OL70_core - 1	100	1460.83	63.6906		2.06603	253.441	245.815	656.97	2.48931	144.316	12.0254	225.013	843.64	147.138	2967.15	5.49343	82.15	< LOD	0.0111271	0.0270455	0.134859	0.0100959	0.0022846		48.72	0.1	10.23	0.14	0.04	41.21	0.36	100.93		89.4513
AJE49a_OL70_core - 2	100	1460.76	63.687		2.51138	263.923	245.759	688.18	2.49728	153.419	12.4202	204.755	842.322	146.315	2912.53	5.19099	80.6938	0.0363014	0.478075	0.0357674	0.222988	0.06879	0.464935		48.72	0.1	10.23	0.14	0.04	41.21	0.36	100.93		89.4513
AJE49a_OL71_core - 1	100	1411.23	61.0768		2.03316	220.835	207.518	601.661	2.42618	123.384	9.37037	438.367	853.133	144.403	2975.67	5.3646	79.2661	< LOD	0.00998296	0.0179887	0.162151	0.0325677	< LOD		49.07	0.09	10	0.12	0.06	41.37	0.41	101.21		89.7345
AJE49a_OL71_core - 2	100	1410.49	61.0377		1.99099	218.429	206.977	570.801	2.38331	125.958	9.30373	455.016	854.287	143.195	2997.53	5.53541	78.8899	< LOD	0.01142	0.0190579	0.146912	0.0320236	< LOD		49.07	0.09	10	0.12	0.06	41.37	0.41	101.21		89.7345
AJE49a_OL72_core - 1	100	1457.74	63.528		2.01312	267.857	243.307	566.666	2.54607	150.915	12.1969	280.117	837.08	143.844	2981.54	4.85177	80.3299	< LOD	0.0127084	0.0280597	0.113111	0.0090426	< LOD		49.18	0.09	9.89	0.14	0.07	41.06	0.39	100.91		89.873
AJE49a_OL75_core - 1	100	1295.89	54.9983		1.87014	148.384	134.282	403.584	2.28097	256.128	8.16603	338.111	851.338	135.52	3082.81	3.80268	58.8425	0.00145397	0.0126114	0.0206921	0.373725	0.0626475	0.00609123		49.96	0.06	8.62	0.11	0.05	41.57	0.41	101.01		91.1671
AJE49a_OL76_core - 1	100	1303.24	55.3856		1.48904	153.458	138.321	425.666	2.18767	184.105	8.04245	373.265	789.84	134.273	3160.02	4.54114	65.3552	0.00142296	0.0169162	0.0163545	0.279688	0.0447047	0.004184		50.24	0.07	8.26	0.13	0.04	41.59	0.47	100.89		91.5663
AJE49a_OL76_core - 2	100	1306.98	55.5826		1.74131	157.825	140.407	441.067	2.19514	172.144	8.40701	361.111	800.64	136.961	3127.62	4.58124	71.5503	0.00153989	0.0157381	0.0154098	0.277412	0.0559713	0.0132853		50.24	0.07	8.26	0.13	0.04	41.59	0.47	100.89		91.5663
AJE49a_OL77_core - 1	100	1313.04	55.9022		1.46539	155.057	143.837	447.714	2.56462	176.099	10.8104	337.941	874.603	135.778	2952.79	4.53747	58.558	< LOD	0.00461672	0.0108552	0.126945	0.0282915	< LOD		49.79	0.05	8.97	0.12	0.06	41.53	0.42	101.04		90.8286
AJE49a_OL78_core - 1	100	1077.56	43.4922		1.37763	84.5846	48.0602	225.258	1.66005	49.6402	4.27608	166.522	632.43	121.306	3042.08	0.931727	43.993	0.100723	1.08129	0.0187569	0.793077	1.04053	1.09359		51.49	0.03	6.81	0.09	0.03	41.65	0.42	100.58		93.084
AJE49a_OL79_core - 1	100	1041.44	41.5887		1.1332	79.0398	39.2348	163.328	1.77469	45.2898	5.1734	190.704	747.471	139.774	3333.3	1.13931	50.303	< LOD	0.00285454	0.0029757	0.591066	0.744212	0.000575025		50.82	0.01	7.58	0.09	0.02	41.8	0.45	100.82		92.2832
AJE49a_OL79_core - 2	100	1040.6	41.5448		1.2409	79.2214	39.0467	163.859	1.77821	45.2798	5.12149	191.087	745.375	139.587	3327.7	1.15342	49.4345	< LOD	0.00364264	0.00379684	0.57914	0.747489	0.00189196		50.82	0.01	7.58	0.09	0.02	41.8	0.45	100.82		92.2832
AJE49a_OL81_core - 1	100	1062.37	42.6918		0.964998	105.777	44.1892	365.474	1.33502	17.0539	5.48526	181.274	676.592	135.679	3303.58	1.76974	49.2483	0.141214	2.71326	0.0420232	0.911646	0.941201	2.53479		51.05	0.02	7.21	0.09	0.04	42.07	0.45	100.98		92.6518
AJE49a_OL81_core - 2	100	1127.73	46.1362		1.07484	187.055	62.6091	631.626	1.43289	39.4534	5.73925	188.054	682.562	135.598	3303.44	1.76396	50.1622	0.499739	6.46015	0.0801791	2.87687	1.47763	6.61837		51.05	0.02	7.21	0.09	0.04	42.07	0.45	100.98		92.6518
AJE49a_OL82_core - 1	100	1401.62	60.5703		1.91154	183.941	200.584	659.518	2.2288	87.9601	10.5714	348.648	814.635	143.598	3411.95	4.48739	62.0716	0.00231467	0.0736942	0.0216708	0.123257	0.0260936	0.0336154		49.97	0.09	8.62	0.11	0.03	41.55	0.38	100.84		91.1796
AJE49a_OL82_core - 2	100	1343.26	57.4947		1.41174	160.558	161.778	533.981	1.8935	32.106	8.46512	292.708	789.972	136.487	2957.47	4.49134	63.1205	< LOD	0.00929639	0.0147286	0.0946318	0.0209144	0.00177102		49.97	0.09	8.62	0.11	0.03	41.55	0.38	100.84		91.1796
AJE49a_OL83_core - 1	100	1162.55	47.9714		1.16199	95.4513	74.4108	335.401	1.67852	33.4765	6.66436	340.023	783.779	140.952	3309.02	5.13048	54.4015	< LOD	0.00925929	0.00544466	0.390327	0.100436	0.000634194		50.24	0.05	8.3	0.11	0.07	41.46	0.45	100.7		91.5164
AJE49a_OL83_core - 2	100	1161.96	47.9401		1.22729	99.4599	74.1972	329.115	1.66641	33.1751	6.61701	338.994	780.511	140.173	3296.64	5.04838	54.1799	< LOD	0.01319	0.00491657	0.375041	0.0952172	0.0107449		50.24	0.05	8.3	0.11	0.07	41.46	0.45	100.7		91.5164
AJE49a_OL84_core - 1	100	1100.7	44.7117		0.892074	81.971	54.4252	274.033	1.52848	17.3297	5.32845	208.089	708.995	131.911	3093.85	1.4818	50.1816	0.0241088	0.617704	0.00819409	0.319823	0.642128	0.419164		51.29	0.04	7.22	0.11	0.03	41.89	0.43	101.04		92.6803
AJE49a_OL84_core - 2	100	1048.09	41.9393		0.8066	70.264	40.7628	180.681	1.3179	9.87017	5.24131	210.406	682.028	133.431	3202.86	1.47001	48.4224	0.00504721	0.0344264	0.00128129	0.287413	0.617909	0.0521264		51.29	0.04	7.22	0.11	0.03	41.89	0.43	101.04		92.6803
AJE49a_OL85_core - 1	100	1073.29	43.2676		0.979864	80.0197	46.95	177.564	1.41002	61.5717	5.23804	163.045	629.981	133.415	3348.34	0.852878	47.6113	< LOD	0.00941799	0.00171086	0.303065	0.299391	0.0062195		51.29	0.02	7.22	0.1	0.02	41.69	0.49	100.87		92.6933
AJE49a_OL85_core - 2	100	1137.56	46.6544		1.19827	118.077	65.794	333.048	1.47519	88.6422	5.46438	165.69	632.275	132.442	3329.31	1.03438	47.7974	0.151782	1.68498	0.0297552	0.690401	0.596831	1.71513		51.29	0.02	7.22	0.1	0.02	41.69	0.49	100.87		92.6933
AJE49a_OL87_core - 1	100	1409.07	60.9628		1.96065	220.458	205.943	642.552	2.19221	101.723	11.0091	166.956	854.53	149.255	2876.09	4.61143	87.2455	0.0325861	0.636651	0.0227242	0.103179	0.0230114	0.102459		48.36	0.08	10.62	0.12	0.02	40.99	0.38	100.66		89.0421
AJE49a_OL88_core - 1	100	995.492	39.1674		1.90244	82.6296	29.8086	183.071	1.79904	177.024	3.54395	135.824	946.719	138.656	2851.07	1.09344	87.3835	0.00153692	0.0361705	0.00475696	0.367835	0.268493	0.030072		48.84	0.04	10.35	0.13	0.01	41.18	0.44	101.05		89.3715
AJE49a_OL88_core - 2	100	1428.71	61.9978		1.78201	84.7085	220.527	274.753	1.799	180.176	19.8012	136.047	948.129	138.31	2838.47	1.12283	85.6548	0.0578511	0.851326	0.0043555	0.494359	0.274578	0.00700503		48.84	0.04	10.35	0.13	0.01	41.18	0.44	101.05		89.3715
AJE49a_OL89_core - 1	70	1373.48	59.0874		1.66571	175.292	181.177	447.483	2.97489	170.982	9.76847	445.552	837.865	135.997	2999.9	4.84586	60.4102	0.00778434	0.137232	0.00850765	0.137252	0.0275179	0.0122787		49.86	0.05	8.89	0.11	0.06	41.47	0.41	100.95		90.9059
AJE49a_OL89_core - 2	70	1373.31	59.0782		1.48956	178.314	181.06	426.494	2.92695	172.725	9.75112	450.574	840.035	135.974	2996.56	4.83232	59.7096	< LOD	0.00853912	0.0080303	0.136783	0.0292895	< LOD		49.86	0.05	8.89	0.11	0.06	41.47	0.41	100.95		90.9059
AJE49a_OL95_core - 1	70	1113.15	45.3679		0.980528	156.496	58.0926	539.012	2.03164	69.1325	4.9599	197.847	637.944	132.957	3418.4	1.15348	46.6985	0.438599	3.30886	0.0542157	1.52601	0.842504	3.23077		51.16	0.03	7.14	0.06	0.03	41.66	0.47	100.61		92.7536
AJE49a_OL96_core - 1	70	1038.12	41.414		2.0198	113.737	38.4895	288.939	2.47405	147.064	3.54052	180.565	881.376	135.651	3198.68	1.31922	64.0156	0.0899462	1.30053	0.0223121	0.598908	0.435821	1.27315		49.4	0.02	8.6	0.1	0.02	41.34	0.43	99.99		91.093
AJE49a_OL96_core - 2	70	1035.46	41.274		1.75367	89.5106	37.8995	179.702	2.57995	150.175	3.54667	179.616	883.93	134.457	3153.45	1.14218	63.6365	0.00614505	0.0935896	0.00580332	0.480899	0.29964	0.0753593		49.4	0.02	8.6	0.1	0.02	41.34	0.43	99.99		91.093
AJE49a_OL97_core - 1	70	1418.64	61.4673		1.41924	225.842	212.969	495.079	2.64841	142.322	9.59792	536.737	765.08	128.99	2955.25	5.03628	53.9603	0.00197213	0.0160399	0.0157506	0.127099	0.0200701	0.0148579		50.44	0.08	8.19	0.11	0.07	41.51	0.41	100.89		91.6578
AJE49a_OL97_core - 2	70	1412.66	61.1523		1.43188	238.832	208.564	543.13	2.65263	140.253	10.3553	525.029	767.467	128.697	2947.95	5.0093	54.4709	0.0933193	3.28953	0.0211458	1.23928	0.139033	2.10649		50.44	0.08	8.19	0.11	0.07	41.51	0.41	100.89		91.6578
AJE49a_OL99_core - 1	100	1005.37	39.6879		1.07824	47.6913	31.6748	147.076	1.87959	58.0307	4.29079	133.281	713.376	136.813	3431.92	0.545452	46.7101	< LOD	0.0250992	0.00399373	0.51358	1.28093	0.00729891		50.69	0.01	7.14	0.11	0	42.01	0.44	100.47		92.669
AJE49a_OL99_core - 2	100	1009.56	39.909		1.12165	59.13	32.4936	181.933	1.8767	60.2019	4.33021	133.992	712.983	136.957	3437.36	0.551482	46.6915	0.0359012	0.652686	0.0139509	0.623967	1.32972	0.646417		50.69	0.01	7.14	0.11	0	42.01	0.44	100.47		92.669
AJE49a_OL102_core - 1	100	991.913	38.9788		1.08557	41.8505	29.1528	136.257	1.37119	20.4015	3.77608	131.886	643.154	131.682	3248.38	0.493528	44.8454	< LOD	0.00990279	0.00225127	0.424779	1.12357	0.00481332		51.25	0.03	6.81	0.08	0.02	41.79	0.43	100.46		93.0619
AJE49a_OL102_core - 2	100	1024.32	40.6869		0.985506	61.7565	35.4987	230.042	1.38235	28.5518	3.92115	133.465	646.359	131.893	3254.66	0.547913	44.959	0.0804156	1.10609	0.0183745	0.636907	1.26795	1.10929		51.25	0.03	6.81	0.08	0.02	41.79	0.43	100.46		93.0619
AJE49a_OL106_core - 1	100	1065.01	42.8311		1.00123	67.7991	44.8457	193.071	1.23616	18.2108	5.00515	163.174	656.638	135.591	3341.58	1.25904	49.3623	0.000939943	0.00247967	0.00129089	0.303424	0.32792	0.00145395		50.6	0.02	7.45	0.12	0.02	41.64	0.44	100.33		92.3813
AJE49a_OL106_core - 2	100	1065.34	42.8482		0.806287	68.2343	44.9269	192.897	1.27321	18.0642	5.01325	163.144	656.898	135.47	3324.72	1.22378	48.7202	0.00182755	0.0287083	0.0011785	0.306041	0.323032	0.0287807		50.6	0.02	7.45	0.12	0.02	41.64	0.44	100.33		92.3813
AJE49a_OL108_core - 1	100	1040.06	41.5164		1.2927	96.7614	38.9251	411.095	3.5518	29.411	2.41723	109.626	812.294	134.35	3628.55	2.39227	46.3485	0.14379	2.63917	0.0489973	0.956719	0.650918	2.05811		51.07	0.02	7.15	0.13	0.02	41.73	0.49	100.63		92.7105
AJE49a_OL108_core - 2	100	1033.82	41.1875		1.0909	97.0869	37.5388	396.396	3.61524	24.8412	2.44061	111.269	811.248	131.999	3611.91	2.29506	42.6343	0.133476	2.4836	0.0660768	0.599546	0.691908	2.40392		51.07	0.02	7.15	0.13	0.02	41.73	0.49	100.63		92.7105
Cr-rich megacrysts/ sheared peridotites? (Ca > 715 ppm)
AJE49a_OL17_core - 1	100	1540.9	67.9102		3.07698	331.561	316.857	770.953	3.37629	132.117	12.4368	589.053	905.974	142.258	2757.13	7.94846	70.7093	0.0147873	0.0778567	0.0312783	0.160131	0.0167305	0.0720561		48.91	0.1	9.63	0.13	0.09	41.23	0.38	100.54		90.0709
AJE49a_OL30_core - 1	100	1525.49	67.0981		0.784612	203.762	302.277	968.511	3.70318	10.015	6.73898	586.536	1065.45	151.069	2709.03	5.92984	57.1132	0.0118087	0.141748	0.00793449	0.0645052	0.055105	0.13584		49.1	0.14	9.53	0.15	0.09	41.38	0.38	100.87		90.1703
AJE49a_OL33_core - 1	100	1508.87	66.2226		2.00597	271.266	287.048	786.247	2.56829	117.174	11.9017	244.396	842.192	151.41	2959.1	5.50777	89.2838	0.00300131	0.0679331	0.0361919	0.13007	0.0144549	0.0450187		48.34	0.1	10.62	0.11	0.02	41.1	0.41	100.78		89.0265
AJE49a_OL33_core - 2	100	1486.06	65.0202		2.08829	263.773	266.952	739.244	2.55439	113.921	11.6578	244.648	842.798	153.349	2984.82	5.59615	91.0153	< LOD	0.0171727	0.0320698	0.106434	0.00862907	0.00150774		48.34	0.1	10.62	0.11	0.02	41.1	0.41	100.78		89.0265
AJE49a_OL63_core - 1	100	1454.89	63.3777		0.919828	213.795	241.005	1427.89	1.62607	56.4141	7.25749	483.971	1093.72	157.587	2622.02	6.02044	62.8394	0.27382	3.84829	0.0355862	0.790526	0.465178	2.96323		48.65	0.19	9.83	0.16	0.07	41.25	0.32	100.59		89.8046
AJE49a_OL63_core - 2	100	1445.86	62.9018		0.791088	245.143	233.808	1511.42	1.63242	59.1756	6.95405	482.749	1094.04	157.058	2608.75	6.21596	61.0562	0.437859	4.60194	0.0467128	0.986583	0.684885	4.51		48.65	0.19	9.83	0.16	0.07	41.25	0.32	100.59		89.8046
AJE49a_OL90_core - 1	70	1468.62	64.1014		0.556807	272.817	252.225	1045.27	2.26306	26.2764	8.40132	595.879	1042.33	155.722	2607.72	2.74765	65.5561	< LOD	0.0133248	0.000827763	0.0039174	0.0243305	0.00143769		48.8	0.16	10.11	0.17	0.08	41.02	0.36	100.79		89.5723
AJE49a_OL90_core - 2	70	1472.27	64.2936		0.716388	272.341	255.26	1052.69	2.19993	27.3974	8.45528	603.732	1046.27	155.939	2615.92	2.70542	65.6901	0.00440316	0.0281946	0.00146301	0.00782865	0.0308872	0.0214687		48.8	0.16	10.11	0.17	0.08	41.02	0.36	100.79		89.5723
AJE49a_OL92_core - 1	100	1574.35	69.6731		0.747372	402.95	350.021	1164.11	1.9211	72.6572	7.90516	576.963	946.509	148.163	2543.54	7.05749	58.1822	0.218843	2.53912	0.0476966	0.701837	0.468679	2.49354		49.59	0.14	9	0.15	0.09	41.37	0.37	100.82		90.7512
AJE49a_OL92_core - 2	100	1575.52	69.7347		< LOD	316.957	351.218	991.242	1.84649	16.7642	7.55293	581.384	965.041	149.562	2547.43	7.90806	60.6382	0.00322426	0.0454043	0.00268322	0.0175076	0.0595572	0.0292585		49.59	0.14	9	0.15	0.09	41.37	0.37	100.82		90.7512
AJE49a_OL93_core - 1	100	1577.78	69.8541		0.842702	311.357	353.545	980.04	1.85105	16.814	7.57949	574.788	931.3	147.708	2514.11	6.17504	62.4997	< LOD	0.0141396	0.00267476	0.009103	0.0550591	0.00511151		49.29	0.15	8.94	0.13	0.08	41.34	0.36	100.41		90.7638
AJE49a_OL93_core - 2	100	1560.34	68.9347		0.950621	303.366	335.876	950.554	1.96643	23.2252	8.18351	569.746	922.089	149.775	2541.26	6.02587	65.8792	0.00102906	0.012958	0.00647921	0.0182514	0.0543143	0.000532855		49.29	0.15	8.94	0.13	0.08	41.34	0.36	100.41		90.7638
AJE49a_OL94_core - 1	100	1522.57	66.9446		2.1194	406.104	299.571	736.966	3.08456	76.3917	12.006	793.378	807.212	135.569	2903.92	7.93725	73.9113	0.00601581	0.0791968	0.0181621	0.0916426	0.0171771	0.0613453		50.02	0.1	8.61	0.1	0.12	41.46	0.37	100.92		91.1858
AJE49a_OL95_core - 2	70	1223.4	51.178		1.04329	265.517	98.6956	1131.39	2.01632	87.0524	4.9468	203.331	643.931	130.681	3360.97	1.13926	45.9034	0.919474	8.85472	0.0994635	3.44821	1.58824	7.11312		51.16	0.03	7.14	0.06	0.03	41.66	0.47	100.61		92.7536
Cr-poor olivine megacrysts
AJE49a_OL1_core - 1	100	1397.83	60.3706		2.19323	161.908	197.894	488.792	2.2253	176.572	9.11116	221.283	845.683	148.436	2878.59	5.21509	88.9365	0.0187953	0.161075	0.0259048	0.279826	0.0608982	0.152421		47.69	0.08	11	0.1	0.04	41.05	0.37	100.42		88.5339
AJE49a_OL3_core - 1	100	1422.53	61.6721		2.09984	228.52	215.867	585.605	2.75128	172.988	12.1427	183.905	914.076	160.379	2397.58	4.65997	94.3805	0.00145424	0.0159529	0.0229254	0.143151	0.0181487	0.010987		47.03	0.08	12.31	0.15	0.04	40.67	0.32	100.74		87.204
AJE49a_OL7_core - 1	100	1007.55	39.8029		1.68588	128.044	32.0988	388.567	2.40277	138.043	4.17388	19.9872	1301.32	164.007	933.179	1.05619	174.549	0.154737	2.12016	0.0398456	1.03365	0.573584	1.98562		42.29	0.04	18.86	0.16	0	39.02	0.11	100.55		79.979
AJE49a_OL7_core - 2	100	1358.1	58.2767		2.00973	289.443	171.118	1170.59	2.59436	224.518	6.37144	44.7371	1279.93	163.751	941.677	2.08316	168.026	0.933433	14.1624	0.186548	3.25719	2.11607	11.534		42.29	0.04	18.86	0.16	0	39.02	0.11	100.55		79.979
AJE49a_OL9_core - 1	100	1416.63	61.3615		2.01665	201.785	211.483	659.95	2.73521	203.362	10.9975	409.812	911.388	171.965	2229.69	5.13605	90.159	0.0013981	0.0105062	0.0212175	0.152106	0.0207341	0.0018204		46.74	0.1	11.97	0.14	0.06	40.88	0.3	100.3		87.4467
AJE49a_OL9_core - 2	100	1403.19	60.6529		2.23473	199.037	201.705	641.644	2.6682	225.224	11.5779	360.358	925.777	179.43	2065.33	5.27425	94.4183	0.00752898	0.0105058	0.0185167	0.122059	0.0198842	0.0164407		46.74	0.1	11.97	0.14	0.06	40.88	0.3	100.3		87.4467
AJE49a_OL10_core - 1	100	1449.2	63.0777		2.19953	252.914	236.452	587.573	2.6152	152.97	11.8178	184.238	880.604	157.199	2861.92	7.88625	106.264	< LOD	0.0111165	0.0281719	0.134678	0.0127485	0.00121216		47.25	0.09	11.9	0.13	0.02	41	0.37	100.83		87.6241
AJE49a_OL14_core - 1	100	1444.29	62.8193		2.10568	221.492	232.574	691.605	2.80644	130.586	11.2196	309.824	880.57	151.204	2979.65	4.68529	82.6888	0.00351547	0.190314	0.0262531	0.398427	0.0159786	0.00934596		48.04	0.11	10.74	0.12	0.05	41.2	0.36	100.76		88.8455
AJE49a_OL15_core - 1	100	790.01	28.3385		1.54265	69.9088	6.5224	218.061	1.98689	105.131	2.40309	32.7734	1270.23	151.991	1708.03	0.404305	141.041	0.041029	2.09296	0.0181338	0.397817	0.769938	1.48985		44.64	0.03	15.55	0.18	0	40.21	0.21	100.86		83.6389
AJE49a_OL15_core - 2	100	1175.06	48.6308		1.64756	200.953	79.0136	724.051	2.15742	167.931	3.33551	51.6053	1263.17	152.069	1723.1	1.19481	136.243	0.447025	9.99601	0.134861	1.73536	1.88367	7.91175		44.64	0.03	15.55	0.18	0	40.21	0.21	100.86		83.6389
AJE49a_OL15_core - 3	100	789.633	28.3187		1.51467	52.0732	6.50076	185.925	1.93679	104.022	2.41114	31.6419	1277.2	152.232	1710.92	0.361081	141.182	0.00228313	0.0375057	0.00607473	0.489091	0.58898	0.0281756		44.64	0.03	15.55	0.18	0	40.21	0.21	100.86		83.6389
AJE49a_OL16_core - 1	100	1442.71	62.7359		2.03077	231.303	231.333	584.39	2.49931	163.039	11.3384	212.713	868.842	154.203	2890.88	5.56228	95.1013	0.000821507	0.0179215	0.0256761	0.213836	0.0146693	0.00278484		47.7	0.09	11.17	0.11	0.04	41.04	0.39	100.67		88.396
AJE49a_OL18_core - 1	100	1408.41	60.928		2.27681	197.681	205.464	582.13	2.49698	252.614	11.6701	163.24	890.204	155.383	3002.56	5.3071	104.032	0.0112211	0.131382	0.0296385	1.4948	0.0594972	0.0184488		47.14	0.1	11.89	0.11	0.03	40.84	0.42	100.64		87.5931
AJE49a_OL18_core - 2	100	1421.96	61.6425		2.2805	212.635	215.446	613.267	2.617	240.737	11.8078	226.619	890.017	160.185	2983.57	5.73301	105.424	0.00613665	0.111705	0.0312169	2.56197	0.0540854	0.00804962		47.14	0.1	11.89	0.11	0.03	40.84	0.42	100.64		87.5931
AJE49a_OL19_core - 1	100	1334.42	57.0289		2.63631	188.52	156.382	511.669	2.76473	252.438	9.49748	134.338	1062.57	152.239	2788.48	5.18463	148.422	0.012059	0.412916	0.029798	8.31209	0.125961	0.00871088		45.49	0.08	13.89	0.13	0.03	40.42	0.37	100.53		85.365
AJE49a_OL19_core - 2	100	1297.97	55.108		2.78515	184.826	135.418	447.578	2.71221	237.855	8.74478	140.22	1057.86	151.31	2792.11	5.15496	148.835	0.003974	0.145386	0.0264444	2.60884	0.0764508	0.00686266
AJE49a_OL21_core - 1	100	1526.3	67.1408		2.13057	273.765	303.032	795.111	2.73565	141.997	10.8551	168.73	862.443	171.612	3380.66	94.9942	112.91	0.0587386	0.725646	0.0471754	8.15614	0.118006	0.415654		47.1	0.11	11.74	0.11	0.02	40.89	0.38	100.58		87.7355
AJE49a_OL23_core - 1	100	1489.95	65.2252		2.0329	288.883	270.312	709.708	2.56417	172.476	12.6947	122.159	862.493	167.897	2973.32	6.07366	109.438	0.0514172	0.637018	0.0454171	0.325478	0.114925	0.588141		47.41	0.09	11.91	0.09	0.03	41	0.42	101.06		87.6373
AJE49a_OL24_core - 1	100	1583.55	70.1581		2.41771	311.769	359.513	1012.31	2.79349	124.106	10.1795	219.075	830.643	159.791	3348.6	7.27842	106.351	0.00817842	0.119695	0.0602512	0.193964	0.0189648	0.0931409		47.56	0.14	10.87	0.12	0.04	41.27	0.45	100.62		88.6469
AJE49a_OL34_core - 1	100	1520.69	66.8456		2.2638	275.601	297.833	802.429	2.62353	146.382	13.2327	132.839	903.324	168.366	2717.43	6.56598	117.631	0.00238055	0.0371	0.0430204	0.128553	0.0100411	0.0199072		47.53	0.12	11.93	0.11	0.04	41	0.36	101.23		87.646
AJE49a_OL39_core - 1	100	1556.44	68.7296		2.76485	285.534	332.011	859.958	2.63853	137.981	10.6104	163.201	855.931	168.204	3264.31	8.11064	118.274	0.00115763	0.0221883	0.0475491	0.187544	0.00777412	0.00377069		47.21	0.12	11.68	0.1	0.02	40.85	0.42	100.53		87.7971
AJE49a_OL40_core - 1	100	1427.11	61.9137		2.26695	243.566	219.317	656.209	2.66363	159.791	11.3192	363.555	888.516	147.991	2831.72	5.16331	83.9282	0.00210432	0.030323	0.0239356	0.137398	0.0163952	0.0290989		47.76	0.08	10.82	0.11	0.05	41.1	0.4	100.49		88.7269
AJE49a_OL41_core - 1	100	1371.55	58.9855		2.07873	226.07	179.891	475.597	2.58243	200.383	12.4868	149.566	926.076	161.533	2385.11	4.6283	103.608	0.00121982	0.014541	0.0214599	0.153374	0.0200969	0.0112958		46.98	0.06	12.23	0.11	0.02	40.81	0.3	100.65		87.2566
AJE49a_OL48_core - 1	100	1443.75	62.7907		2.1214	223.946	232.147	670.44	2.60452	160.657	11.4308	165.597	875.353	158.074	2605.91	4.85873	97.9464	0.0144599	0.187733	0.0341493	0.189593	0.0462998	0.160147		47.84	0.09	11.46	0.1	0.03	40.82	0.34	100.79		88.144
AJE49a_OL50_core - 1	100	1451.25	63.186		2.38944	254.91	238.089	705.806	2.59681	171.77	11.6274	109.728	909.854	175.031	2814.75	6.6998	127.832	0.00111429	0.0212108	0.0420474	0.167172	0.0122543	0.00496486		46.6	0.09	12.85	0.15	0.01	40.73	0.38	100.89		86.5888
AJE49a_OL51_core - 1	100	1416.96	61.3787		2.25575	239.79	211.725	568.17	2.43409	165.774	11.5992	238.068	853.569	147.389	2968.8	5.82797	93.355	< LOD	0.00892404	0.0272903	0.14258	0.0143797	0.000206785		48.21	0.07	10.87	0.11	0.01	41.31	0.38	101.08		88.7589
AJE49a_OL61_core - 1	100	1499.02	65.7035		2.05503	268.717	278.258	703.493	2.51871	162.29	12.5229	195.937	843.64	151.868	2977.29	6.42848	102.269	< LOD	0.0171254	0.0411919	0.136831	0.00731631	0.00155047		48.04	0.08	10.93	0.12	0.03	40.92	0.38	100.64		88.6806
AJE49a_OL65_core - 1	100	1367.5	58.7721		2.28958	226.778	177.218	494.849	2.4242	220.269	12.0397	98.5435	919.839	165.311	2829.12	6.34978	125.346	< LOD	0.00812147	0.0265357	0.165979	0.0183526	0.0016634		46.64	0.07	13.03	0.13	0	40.39	0.38	100.73		86.4437
AJE49a_OL66_core - 1	100	1448.07	63.0183		2.365	269.664	235.556	612.077	2.51131	149.459	12.7091	144.697	889.28	160.414	2667.55	5.51037	100.447	< LOD	0.00949674	0.028749	0.122646	0.0113613	0.00058881		47.56	0.08	11.67	0.11	0.01	40.86	0.34	100.74		87.9109
AJE49a_OL68_core - 1	70	934.544	35.9555		1.56268	81.5762	20.046	250.174	2.81035	147.976	3.97028	25.83	1192.98	161.79	1021.68	0.719523	161.69	0.0579724	0.684141	0.0203106	0.7811	0.49819	0.746081		43.17	0.07	17.66	0.17	0	39.52	0.17	100.78		81.3333
AJE49a_OL68_core - 2	70	943.965	36.4519		1.65458	118.882	21.3692	419.107	2.84911	141.077	3.54972	25.818	1193.5	161.316	1021.25	0.884635	160.97	0.181979	2.18629	0.0586047	1.20043	0.695788	2.18857		43.17	0.07	17.66	0.17	0	39.52	0.17	100.78		81.3333
AJE49a_OL73_core - 1	100	1432.96	62.2221		1.87271	243.124	223.774	631.064	2.46101	145.53	11.5831	264.676	868.61	154.408	2930.09	5.54732	93.744	< LOD	0.0148784	0.0232193	0.112235	0.00892356	0.00189689		48.3	0.08	10.64	0.14	0.03	41.1	0.39	100.79		88.9873
AJE49a_OL74_core - 1	100	938.773	36.1784		1.34676	180.36	20.6321	936.883	2.11059	126.028	3.74746	32.2724	1146.36	151.561	2137.68	0.719317	129.987	0.398348	9.58074	0.162015	3.34129	2.5007	8.23897		45.93	0.02	14.21	0.15	0.02	40.44	0.27	101.08		85.2165
AJE49a_OL74_core - 2	100	966.287	37.6283		1.54695	224.518	24.7678	552.76	2.03333	116.112	3.83706	31.5393	1142.4	151.618	2133.27	0.811725	130.187	0.585609	6.5945	0.0852115	1.7642	1.90972	6.35318		45.93	0.02	14.21	0.15	0.02	40.44	0.27	101.08		85.2165
AJE49a_OL80_core - 1	100	1487.82	65.113		2.1504	272.438	268.469	675.554	2.4328	156.599	12.5237	139.653	850.412	159.843	2866.92	6.10527	107.027	< LOD	0.0141308	0.0353208	0.130354	0.00610248	0.00147837		47.69	0.1	11.57	0.12	0.03	40.91	0.37	100.91		88.0127
AJE49a_OL86_core - 1	100	1422.27	61.6586		2.16716	218.05	215.675	754.681	2.68934	147.948	8.99596	358.776	909.243	157.542	2981.76	5.15159	91.0036	0.0116443	0.698979	0.0293862	0.177141	0.0135025	0.0315421		47.73	0.13	11.56	0.12	0.04	40.72	0.38	100.78		88.0339
AJE49a_OL91_core - 1	70	1482.41	64.8281		2.06409	255.666	263.828	660.047	2.95953	137.235	12.0858	204.268	870.813	159.174	2958.87	5.51114	97.3276	< LOD	0.0117098	0.0270997	0.114577	0.00732883	0.00078864		48.1	0.11	11.05	0.13	0.04	40.81	0.4	100.77		88.5946
AJE49a_OL91_core - 2	70	1477.41	64.5643		1.90289	249.607	259.576	684.445	2.97458	147.555	11.9009	256.305	871.063	157.383	2959.18	5.45829	93.0732	< LOD	0.0124443	0.0271267	0.121643	0.00858192	0.000447717		48.1	0.11	11.05	0.13	0.04	40.81	0.4	100.77		88.5946
AJE49a_OL98_core - 1	70	1603.48	71.2086		2.44783	282.33	380.621	876.055	3.07143	113.211	10.8843	224.517	860.228	162.453	3029.66	6.18585	106.508	0.0232119	0.303719	0.0431821	0.263069	0.0321742	0.0293976		47.83	0.14	11.53	0.14	0.02	40.84	0.42	101.02		88.0919
AJE49a_OL98_core - 2	70	1556.08	68.7105		1.99732	306.146	331.654	931.213	3.03311	111.61	11.3708	236.954	858.734	163.176	3023.39	6.04558	105.669	0.156124	1.21182	0.0563926	0.329976	0.186239	1.33254		47.83	0.14	11.53	0.14	0.02	40.84	0.42	101.02		88.0919
AJE49a_OL100_core - 1	100	1488.55	65.1514		2.43481	287.92	269.098	671.466	2.49571	146.074	12.6152	212.97	856.172	151.541	2894.24	5.95448	93.8907	< LOD	0.0178046	0.0311396	0.132643	0.0130222	0.00495952		48.25	0.09	10.93	0.09	0.04	41.07	0.38	100.97		88.7199
AJE49a_OL101_core - 1	100	1490.7	65.265		2.23663	281.428	270.967	716.575	2.49895	127.793	12.1611	107.001	885.146	172.722	2777.47	6.5628	118.507	< LOD	0.0133789	0.0336798	0.124039	0.00818549	0.00161172		46.83	0.09	12.42	0.13	0.01	40.62	0.37	100.6		87.0534
AJE49a_OL103_core - 1	100	1450.1	63.1255		2.13287	255.412	237.173	664.99	2.38457	118.603	10.3761	285.484	850.193	155.04	3052.63	5.98824	94.9866	< LOD	0.011134	0.0280198	0.113877	0.0185028	0.00259078		48.33	0.09	10.96	0.12	0.04	41.29	0.43	101.35		88.7
AJE49a_OL104_core - 1	100	1462.81	63.7951		2.02286	250.881	247.435	649.168	2.4757	139.127	12.6154	198.886	859.196	152.241	2925.71	5.63125	94.5273	0.00107374	0.0131378	0.031779	0.115733	0.0111306	0.000862201		47.97	0.09	10.95	0.11	0.04	41.01	0.38	100.65		88.6331
AJE49a_OL105_core - 1	100	1395.61	60.2537		2.68225	288.784	196.33	669.862	2.46857	239.567	12.5075	47.5153	954.623	187.991	2455.4	7.19776	145.284	0.167249	1.96621	0.0611924	0.613905	0.314386	2.00638		45.46	0.07	14.44	0.12	0.03	40.49	0.33	101.07		84.8603
AJE49a_OL105_core - 2	100	1372.91	59.0571		2.19209	244.667	180.794	526.384	2.43156	208.733	12.2727	47.5678	952.02	187.954	2460.74	6.61525	142.885	0.00105929	0.0133989	0.0290815	0.186307	0.0177376	0.000566874		45.46	0.07	14.44	0.12	0.03	40.49	0.33	101.07		84.8603
AJE49a_OL107_core - 1	100	941.038	36.2977		1.9283	75.976	20.9512	232.612	2.0871	136.691	4.08336	31.4899	1196.94	161.271	1234.33	0.926995	150.545	0.00283126	0.00894567	0.00932489	0.543925	0.257066	0.0121862		44.38	0.03	15.8	0.18	0	40.08	0.14	100.64		83.3686
AJE49a_OL107_core - 2	100	939.058	36.1933		1.67244	75.0443	20.672	232.924	2.05608	135.504	4.09498	31.4633	1195.17	160.999	1230.03	0.888094	148.148	< LOD	0.00160051	0.00817217	0.537883	0.25379	0.00086524		44.38	0.03	15.8	0.18	0	40.08	0.14	100.64		83.3686

## Sheet: Damtshaa
Dataset 1d. EPMA, LA-ICP-MS and Al-in-olivine thermometry data for Damtshaa kimberlite.
					LA-ICP-MS data done at Stellenbosch - See methods.																				EPMA data done at University of Joburg - See methods.
	Spot Size (µm)	T (°C)	P (kbars)		Li	Na	Al	Ca	Sc	Ti	V	Cr	Mn	Co	Ni	Cu	Zn	Rb	Sr	Y	Zr	Nb	Ba		MgO	CaO	FeO	MnO	Cr2O3	SiO2	NiO	Total		Mg#
Peridotitic olivine
Orapa-41-OL6-core1 - 1	100	1054.98	44.4128		< LOD	72.9222	39.4027	165.099	3.15366	167.804	6.14352	150.142	744.999	128.258	2729.82	1.63436	49.2729	< LOD	0.103357	0.00824781	0.16478	0.324357	0.263013		50.64	0.03	7.27	0.08	0.01	41.42	0.33	99.85		92.5486
Orapa-41-OL6-core2 - 1	100	1081.8	45.9111		< LOD	147.582	45.6519	305.952	3.15241	179.094	6.38587	149.758	750.307	129.714	2788.33	1.88727	50.6014	0.222978	2.83088	0.0514693	0.768183	0.635298	3.34668											92.55
Orapa-41-OL10-core1 - 1	100	1011.65	41.9972		< LOD	138.491	30.6562	326.996	2.84936	6.95312	4.84206	174.223	733.952	137.55	3245.25	1.55923	44.8822	0.175423	5.03139	0.0663603	0.774289	1.54021	5.87404		51.31	0.03	6.86	0.07	0.02	41.55	0.41	100.28		93.0257
Orapa-41-OL11-core1 - 1	100	717.921	25.7843		0.88618	13.8512	3.11127	75.01	3.13499	16.7298	1.44192	28.0767	984.976	136.113	2808.59	0.241487	58.365	< LOD	0.00716918	0.0174394	0.053378	1.24169	0.0163286		50.27	0.01	8.26	0.12	0.01	41.34	0.35	100.38		91.56
Orapa-41-OL11-core2 - 1	100	832.692	32.0856		0.949339	22.6244	8.80258	128.934	3.08033	17.2961	1.56255	27.2742	978.28	135.449	2813.22	0.979685	57.7708	0.0149148	1.02283	0.033667	0.124086	1.31272	0.183854											91.56
Orapa-41-OL14-core1 - 1	70	1081.04	45.8687		0.474268	102.328	45.4659	251.003	5.17302	214.022	5.28112	89.3923	827.682	132.981	2845.41	1.77057	62.4798	0.0728151	0.951204	0.0218184	0.59249	0.505445	0.982389		50.01	0.03	8.25	0.12	0.01	41.41	0.39	100.33		91.5216
Orapa-41-OL19-core1 - 1	100	782.09	29.3021		0.584793	25.6787	5.72376	131.606	3.91544	13.8366	1.33794	31.2277	920.044	132.878	2897.85	0.264791	45.1269	0.0189761	0.428421	0.0277574	0.40941	1.13191	0.516689		50.66	0	7.5	0.11	0	41.56	0.38	100.21		92.3317
Orapa-41-OL23-core1 - 1	100	732.836	26.6007		0.702382	13.5652	3.61	86.9727	3.49218	19.4266	1.37826	36.3107	886.91	126.973	2823.18	0.18338	48.9642	< LOD	0.00602982	0.00731481	0.0717094	1.49082	0.00957355		50.76	0	7.39	0.09	0.01	41.44	0.38	100.12		92.4549
Orapa-41-OL24-core1 - 1	100	693.428	24.4451		0.615256	18.0366	2.4129	88.0451	3.03524	27.1715	0.950636	38.8156	1113.48	139.417	2982.45	0.175471	66.6522	< LOD	0.00687642	0.00793601	0.0996698	2.48133	0.00922266		49.55	0.01	9.25	0.14	0.02	41.21	0.37	100.56		90.5205
Orapa-41-OL24-core2 - 1	100	688.845	24.1948		0.863668	16.2922	2.29749	91.7366	3.03151	27.0447	0.951341	36.9723	1116.85	139.274	2970.7	0.101924	66.7072	< LOD	0.0134569	0.00902377	0.1189	2.41268	0.0172026		49.69	0	9.01	0.13	0.01	41.21	0.41	100.47		90.7703
Orapa-41-OL24-core3 - 1	100	705.288	25.0933		0.544562	13.9812	2.73332	94.4866	3.11672	24.5737	0.941385	36.5709	1122.07	140.761	2979.52	0.252183	67.5453	< LOD	0.0192418	0.00931362	0.111506	2.17001	0.0729341											90.6
Orapa-41-OL25-core1 - 1	100	1061.06	44.752		0.7696	183.229	40.7604	377.963	3.70794	123.823	4.27604	185.895	895.08	128.412	2633.54	1.41888	52.6966	0.297122	4.00346	0.0756284	1.5385	0.862221	4.7243		50.79	0.03	7.63	0.09	0.02	41.56	0.34	100.52		92.2292
Orapa-41-OL27-core1 - 1	100	822.998	31.5517		0.803329	9.44871	8.13104	102.451	3.05067	94.9103	1.79394	22.1467	1150.32	144.824	2529.21	0.328501	62.963	< LOD	0.00585223	0.00799391	0.133397	0.74109	0.00885123		48.59	0	10.39	0.14	0	41.19	0.32	100.67		89.2846
Orapa-41-OL29-core1 - 1	100	1397.52	63.7259		0.706142	214.436	180.151	467.02	3.81708	192.701	11.1374	267.397	887.546	145.083	3050.67	5.04597	65.1949	< LOD	0.0148452	0.0173548	0.187374	0.0290336	< LOD		49.54	0.08	8.79	0.11	0.04	41.19	0.41	100.27		90.9522
Orapa-41-OL30-core1 - 1	100	1078.23	45.7116		0.75736	96.5755	44.7817	181.761	3.31712	131.328	5.92364	174.805	782.021	137.348	2888.81	2.1345	53.941	< LOD	0.00354064	0.00484331	0.171036	0.148811	0.0142656		50.39	0.02	7.93	0.1	0.03	41.39	0.39	100.35		91.8816
Orapa-41-OL31-core1 - 1	100	1037.51	43.438		< LOD	69.1557	35.6821	166.448	2.99076	40.8311	4.78824	160.753	746.058	137.585	3108.49	2.08266	51.2917	< LOD	0.00104946	0.000552909	0.0387703	0.329148	0.00991116		50.81	0.02	7.62	0.09	0.03	41.36	0.42	100.41		92.2436
Orapa-41-OL32-core1 - 1	100	1008.27	41.8088		< LOD	85.0094	30.0393	117.348	3.11229	17.7331	5.2968	234.372	730.692	137.534	3250.94	1.59687	45.158	< LOD	0.00536354	0.00258767	0.243346	0.681521	< LOD		50.9	0.03	7.02	0.11	0.03	41.52	0.42	100.08		92.816
Orapa-41-OL37-core1 - 1	100	1088.23	46.2706		0.780489	121.814	47.2506	207.504	3.74364	224.134	5.54786	313.942	925.545	139.375	3010.9	2.85538	59.5944	< LOD	0.019313	0.00417949	0.243466	0.154178	0.0290731		49.88	0.04	8.43	0.12	0.03	41.31	0.36	100.22		91.3437
Orapa-41-OL43-core1 - 1	100	779.938	29.1839		1.43968	11.9945	5.61472	69.3671	3.18655	12.5956	0.996174	30.2998	1008.54	138.099	2966.09	0.163158	52.0488	< LOD	0.00762282	0.00469334	0.0121901	0.473396	0.0254258		50.13	0.01	8.4	0.14	0.01	41.16	0.39	100.26		91.407
Orapa-41-OL43-core2 - 1	100	788.038	29.6288		1.13944	20.7388	6.03375	75.1388	3.1781	12.8357	0.984622	30.6993	1009.52	138.235	2965.89	0.251585	53.8773	< LOD	0.0336015	0.00652477	0.0203897	0.463549	0.0408121											91.41
Orapa-41-OL44-core1 - 1	100	1397.18	63.7065		0.9036	244.732	179.936	549.359	3.90375	206.85	11.8218	289.49	931.213	144.316	3005.05	6.56917	69.1554	0.118528	1.51138	0.0518493	0.671284	0.253351	1.76388		49.2	0.06	9.14	0.13	0.04	41.16	0.4	100.25		90.568
Orapa-41-OL47-core1 - 1	100	1053.44	44.327		0.72004	136.188	39.0642	190.591	3.47947	86.4721	4.35653	264.629	935.963	145.202	3827.78	2.39947	55.5407	< LOD	0.0232222	0.0104481	0.322065	0.307002	0.0673564		49.84	0.03	8.08	0.12	0.02	41.24	0.49	99.88		91.6632
Orapa-41-OL50-core1 - 1	70	1189.51	51.9521		1.90464	181.758	78.0339	549.722	5.56179	204.309	6.43823	398.936	1065.26	161.086	3259.57	3.88705	105.754	0.204164	2.61351	0.047935	0.921182	0.308902	2.85015		50.71	0.03	7.47	0.09	0.03	41.44	0.44	100.22		92.363
Orapa-41-OL50-core2 - 1	70	1085.46	46.1156		0.487463	208.53	46.5565	444.046	5.18155	105.902	6.11196	256.188	770.104	139.233	3210.19	1.97248	55.1955	0.4706	5.26282	0.083674	1.94524	1.03983	6.2721											92.36
Orapa-41-OL54-core1 - 1	70	691.458	24.3375		1.19093	6.92432	2.36273	84.5914	4.87053	21.7413	0.830496	19.1216	997.107	132.83	2777.67	0.311107	64.8627	< LOD	0.0190218	0.00738067	0.0463108	0.915424	0.0216114		49.93	0.01	8.23	0.11	0	41.34	0.38	100.01		91.5329
Orapa-41-OL55-core1 - 1	100	679.733	23.6972		2.01922	24.7761	2.08122	92.3559	3.13838	15.958	1.25082	43.171	1015.82	131.66	2710.7	0.272113	55.4218	0.00600137	0.0726555	0.0131521	0.132335	1.67957	0.108555		50.17	0.02	8.11	0.11	0.01	41.35	0.36	100.15		91.6896
Orapa-41-OL57-core1 - 1	70	1042.5	43.7167		0.557238	122.276	36.7186	196.736	5.02215	56.8213	5.41607	248.284	790.741	136.186	3020.52	2.58094	53.549	0.0861506	1.25358	0.0220134	0.252336	0.502997	1.52897		50.65	0.02	7.66	0.1	0.04	41.34	0.38	100.23		92.1839
Orapa-41-OL57-core2 - 1	70	1045.63	43.891		< LOD	120.127	37.3781	171.973	4.98787	56.6919	5.27561	243.019	786.237	135.972	2985.48	2.22099	52.8121	0.0574858	0.652435	0.0125216	0.318773	0.401994	0.710516											92.18
Orapa-41-OL64-core1 - 1	100	705.956	25.1299		0.345033	16.3478	2.75235	86.1735	3.63399	8.51266	1.40193	45.6048	854.999	138.943	3315.94	0.187976	45.1615	< LOD	0.0364276	0.0158027	0.102514	1.00263	0.0563289		50.73	0.01	7.4	0.11	0	41.27	0.41	99.96		92.4381
Orapa-41-OL65-core1 - 1	100	646.923	21.9079		1.34105	17.1057	1.43429	90.8775	3.32042	20.717	1.37623	42.2254	997.95	133.335	2795.78	0.26043	54.3374	< LOD	0.0258623	0.00901732	0.0965875	2.04367	0.0422957		50.41	0.02	7.63	0.13	0	41.4	0.38	100.01		92.175
Orapa-41-OL65-core2 - 1	100	674.775	23.4266		0.962015	24.8072	1.97066	93.3312	3.31279	20.5821	1.3875	41.9963	992.78	133.556	2820.37	0.21673	55.0962	< LOD	0.0698238	0.00985677	0.105115	2.05507	0.0728963											92.18
Orapa-41-OL67-core1 - 1	70	1051.48	44.2176		< LOD	97.1051	38.6363	128.325	5.05862	48.5451	4.62268	187.994	793.963	137.46	3047.25	1.77811	54.1688	0.00585283	0.0275129	0.00484882	0.216569	0.364317	0.0173895		50.83	0.01	7.44	0.1	0.04	41.31	0.39	100.16		92.4033
Orapa-41-OL69-core1 - 1	100	1050.89	44.1847		< LOD	204.947	38.5082	389.048	3.7846	109.801	4.28109	180.712	848.529	135.619	2984.02	1.37953	51.8602	0.319718	4.84379	0.0828379	1.40585	1.04251	5.46865		50.4	0.02	7.64	0.1	0.02	41.25	0.39	99.85		92.1605
Orapa-41-OL70-core1 - 1	70	995.515	41.0993		< LOD	42.9716	27.797	169.142	4.79524	28.4893	5.14368	140.253	778.496	136.593	2988.93	2.29601	59.1792	< LOD	0.0227411	0.00158559	0.0265287	0.57475	0.0402322		50.3	0.03	7.94	0.11	0.03	41.28	0.36	100.08		91.8668
Orapa-41-OL72-core1 - 1	100	698.46	24.7201		1.02974	43.0307	2.54495	133.122	2.90146	31.6999	1.07344	44.718	981.208	127.9	3136.08	0.305548	54.4572	0.0377532	0.770798	0.0196741	0.143019	1.65265	0.766482		50.58	0	7.4	0.12	0.01	41.41	0.38	99.89		92.4175
Orapa-41-OL74-core1 - 1	100	634.924	21.2544		1.26935	23.7258	1.24328	110.261	3.44407	59.7085	1.54637	50.494	1142.57	134.659	3179.11	0.281532	71.6392	0.0123	0.0453183	0.00383951	0.185982	1.61715	< LOD		49.8	0.02	8.4	0.13	0.01	41.15	0.38	99.92		91.3547
Orapa-41-OL78-core1 - 1	70	1004.23	41.5843		< LOD	53.3087	29.3159	131.335	4.70666	9.95099	4.12331	229.487	743.687	135.591	3101.36	1.17845	49.3905	< LOD	0.00149033	0.00153179	0.351911	0.513869	< LOD		50.96	0.02	7.15	0.09	0.04	41.24	0.41	99.93		92.7128
Orapa-41-OL79-core1 - 1	100	998.222	41.2499		0.292869	67.3548	28.2623	150.369	3.21517	59.3033	4.19847	196.39	1022.89	153.131	3374.44	2.00726	57.4459	< LOD	0.00468788	0.00101825	0.150029	0.767791	0.0130076		48.88	0.04	9.67	0.13	0.02	40.68	0.44	99.88		90.0078
Orapa-41-OL80-core1 - 1	70	1086.03	46.1477		< LOD	267.424	46.6994	520.138	4.94002	73.955	5.71294	186.525	743.884	133.285	2976.22	2.60271	55.4818	0.384153	9.5988	0.0881436	1.47629	1.79045	11.8119		50.31	0.11	7.68	0.07	0.03	40.97	0.38	99.73		92.1121
Orapa-41-OL81-core1 - 1	100	984.02	40.4601		0.662686	92.5688	25.884	142.861	3.75349	106.564	4.21818	210.935	1016.47	151.953	2925.74	1.57865	62.9743	< LOD	< LOD	0.0039248	0.19538	0.769518	0.0131907		48.93	0.02	9.67	0.11	0.02	40.75	0.34	99.9		90.017
Orapa-41-OL81-core2 - 1	100	990.821	40.8382		0.662635	107.399	27.0036	155.745	3.71215	105.434	4.17212	210.2	1008.11	151.632	2938.39	1.84866	64.8819	< LOD	0.0159275	0.00538669	0.226059	0.743712	0.0366608											90.02
Orapa-41-OL83-core1 - 1	100	1050.88	44.1838		< LOD	128.923	38.5045	189.376	3.27687	43.2169	5.29516	284.838	717.868	127.379	2934.71	1.36537	44.1488	0.0610575	0.81933	0.0135003	0.43928	0.377178	1.03509		51.66	0.02	6.65	0.1	0.05	41.56	0.4	100.46		93.2635
Orapa-41-OL86-core1 - 1	100	1463.62	67.4966		0.914965	254.434	225.178	570.163	4.05394	164.911	11.9084	510.144	863.03	139.897	3060.9	6.11911	57.1263	0.0342424	0.182241	0.0160864	0.183777	0.0370102	0.38493		49.97	0.1	8.39	0.08	0.07	40.89	0.42	100.02		91.3956
Orapa-41-OL89-core1 - 1	100	1054.23	44.3708		< LOD	85.8306	39.2367	182.212	3.18408	74.4379	6.19729	234.113	762.884	139.86	3187.68	2.08736	49.1654	< LOD	0.00284432	0.00252553	0.140546	0.214415	< LOD		50.78	0.02	7.51	0.11	0.04	41.4	0.39	100.28		92.3358
Orapa-41-OL91-core1 - 1	100	1008.85	41.8414		< LOD	51.5642	30.1455	115.699	2.89492	7.91226	4.58595	227.869	757.56	131.572	3021.44	2.19207	46.0885	< LOD	0.0221373	< LOD	0.0064812	0.0761185	0.0131131		51.38	0.02	6.89	0.09	0.04	41.56	0.39	100.41		92.9997
Orapa-41-OL92-core1 - 1	100	1005.21	41.6385		< LOD	98.6504	29.4894	119.922	3.46045	31.7062	3.80239	199.205	877.869	140.566	2471.12	0.727745	54.3189	0.0341838	0.390844	0.0121946	0.274728	0.65743	0.478599		50.02	0.02	8.35	0.13	0.02	41.1	0.3	99.97		91.437
Orapa-41-OL92-core2 - 1	100	1035.19	43.3087		< LOD	163.014	35.2082	158.232	3.49645	36.495	3.65823	190.131	873.72	140.051	2462.67	0.476619	53.3904	0.0476209	0.694949	0.0264285	0.37052	0.673743	0.82247											91.44
Orapa-41-OL93-core1 - 1	100	1079.32	45.7724		< LOD	90.73	45.0457	177.694	3.07152	95.3438	6.17431	160.029	766.141	137.92	3067.38	2.45893	54.1823	< LOD	0.0222125	0.00239697	0.131701	0.152027	0.0289825		50.39	0.02	7.66	0.1	0.03	41.41	0.39	100.06		92.1459
Spinel-bearing peridotites (Mn > 1160 ppm and Al < 10 ppm)
Orapa-41-OL48-core1 - 1	100	709.115	25.3026		1.08013	8.33917	2.8437	82.5279	3.56622	23.3001	1.19723	18.6465	1173.64	144.274	2879.31	0.300867	74.8596	< LOD	0.0168434	0.00606466	0.0490619	1.06703	0.020059		49.02	0.03	9.7	0.13	0	40.99	0.38	100.29		90.0083
Orapa-41-OL52-core1 - 1	70	708.934	25.2927		1.703	86.5325	2.8384	217.952	4.98941	121.494	1.87153	66.4531	1163.8	136.229	2659	0.467462	88.3137	0.0657741	2.09001	0.0355684	0.414032	2.27694	7.33576		48.71	0.02	10.02	0.15	0.02	40.98	0.35	100.3		89.6514
Orapa-41-OL76-core1 - 1	100	548.343	16.5529		1.20079	19.4991	0.391391	101.308	3.80687	54.4323	1.15459	31.0181	1221.07	132.87	2764.4	0.123677	70.0433	< LOD	0.0168417	0.0039393	0.156456	1.24422	0.0416631		49.32	0.03	8.92	0.12	0.01	41.04	0.37	99.83		90.7927
Orapa-41-OL77-core1 - 1	100	608.239	19.8027		1.05407	33.8518	0.892141	112.589	3.68639	51.9118	1.8269	40.6642	1304.27	138.946	2703.65	1.00992	73.4372	< LOD	0.22289	0.00591252	0.164644	1.30284	0.178707		48.98	0.03	9.66	0.15	0.01	40.86	0.34	100.05		90.035
Orapa-41-OL94-core1 - 1	100	713.031	25.5168		1.3331	40.0315	2.96032	125.308	3.30768	97.8946	1.63598	69.7136	1188.52	141.937	2741.77	0.377551	78.4236	< LOD	0.0400418	0.00529699	0.302321	0.762246	0.0588129		48.89	0.03	9.46	0.13	0.01	40.88	0.35	99.79		90.2116
Orapa-41-OL94-core2 - 1	100	739.138	26.9459		1.18254	54.0701	3.83899	138.628	3.26762	95.1238	1.65751	69.6632	1183.18	141.306	2741.44	0.493033	78.7264	< LOD	0.0188387	0.00499648	0.341485	0.763629	0.154174											90.21
Cr-poor olivine megacrysts
Orapa-41-OL1-core1 - 1	100	702.009	24.9141		1.10488	39.0997	2.64151	151.701	3.69377	104.091	1.97928	43.4056	1556.16	164.566	1715.47	0.375919	135.084	< LOD	0.00235811	0.00665447	0.356186	0.557456	0.00548041		44	0.03	16.18	0.19	0	39.75	0.25	100.44		82.905
Orapa-41-OL3-core1 - 1	70	1062.03	44.8065		1.12026	221.113	40.9814	645.11	5.20695	127.182	2.70223	81.1181	889.796	129.794	2696.01	1.29643	60.613	0.648977	7.8861	0.101148	1.72397	2.55872	9.72736		41.05	0.06	18.13	0.21	0	38.97	0.13	98.64		80.1439
Orapa-41-OL4-core1 - 1	100	728.324	26.3537		0.878777	55.1853	3.45286	159.204	3.68753	119.044	1.93731	57.5965	1365.49	144.535	1358.76	0.453657	88.3253	0.0172725	0.274545	0.00662634	0.326247	0.69962	0.373644		47.06	0.03	12.36	0.15	0.01	40.38	0.18	100.24		87.1561
Orapa-41-OL7-core1 - 1	100	699.317	24.7669		0.602642	39.797	2.568	142.562	3.75284	102.003	1.98593	46.7346	1441.61	159.777	1442.35	0.327924	92.9146	< LOD	< LOD	0.00457518	0.292392	0.519479	0.00872188		45.23	0.02	14.31	0.18	0.01	39.84	0.18	99.82		84.933
Orapa-41-OL8-core1 - 1	100	688.837	24.1943		1.66973	28.2135	2.29729	115.675	3.65857	97.7777	2.50825	54.2542	1512.5	137.56	2447.14	0.170471	87.7644	< LOD	0.00701466	0.00842095	0.151087	0.936152	0.00655293		47.24	0.03	12.02	0.2	0.03	40.6	0.31	100.49		87.5141
Orapa-41-OL9-core1 - 1	100	653.158	22.2476		1.18511	40.206	1.54259	168.943	3.83219	52.4079	1.50336	35.7333	1653.01	141.673	2754.83	0.145945	116.062	0.036132	0.742137	0.0173795	0.406854	0.886358	0.706271		46.84	0.02	12.1	0.21	0	40.47	0.36	100.06		87.339
Orapa-41-OL13-core1 - 1	100	1484.09	68.6679		1.41544	261.271	240.455	557.335	3.94	157.435	11.5286	171.174	936.277	164.972	2971.34	7.74785	100.391	< LOD	0.0147557	0.0273086	0.147284	0.0146951	0.0130558		47.64	0.11	11.38	0.12	0.02	40.48	0.36	100.19		88.1906
Orapa-41-OL15-core1 - 1	100	672.16	23.2839		1.28973	31.8439	1.91429	165.711	3.66934	215.412	2.00131	46.919	1627.08	175.741	1576.72	0.164732	137.836	< LOD	< LOD	0.00658356	0.605968	1.02029	0.00621534		43.4	0.03	16.76	0.19	0.01	39.53	0.21	100.19		82.2018
Orapa-41-OL16-core1 - 1	100	1084.29	46.0504		0.314308	190.209	46.2667	531.859	3.0531	79.0572	5.26356	245.162	783.902	135.484	3108.35	3.04225	49.2965	0.697914	5.69278	0.0812314	1.48776	1.17591	6.90783		49.68	0.05	11.4	0.09	0.15	39.99	0.41	101.96		88.5974
Orapa-41-OL16-core2 - 1	100	1048.81	44.0686		< LOD	177.071	38.0586	453.569	2.97622	42.3456	5.15059	242.105	779.77	134.681	3083.03	2.69297	49.4764	0.533341	4.86365	0.0541239	0.504485	0.710924	5.97305											88.6
Orapa-41-OL17-core1 - 1	100	706.867	25.1797		1.16361	45.3469	2.77844	131.329	3.51676	100.689	2.29058	58.8489	1374.92	171.673	1942.68	0.721044	115.793	0.00777444	0.0142762	0.00538643	0.24762	0.300873	0.0471109		44.99	0.01	14.92	0.17	0.01	39.94	0.27	100.33		84.3114
Orapa-41-OL17-core2 - 1	100	698.239	24.708		1.25755	51.2143	2.53904	143.029	3.52003	104.622	2.80399	113.405	1379.04	170.745	1937.69	1.04955	119.053	0.00817932	0.0611547	0.0070862	0.245036	0.267653	0.0974132		44.48	0.01	14.91	0.17	0.01	40.03	0.25	99.9		84.1703
Orapa-41-OL18-core1 - 1	100	732.959	26.6075		1.17633	57.4786	3.61437	169.309	3.73778	117.914	2.37841	57.0551	1533.21	150.068	1821.84	0.331353	125.454	< LOD	0.0742687	0.00651054	0.405301	0.723256	0.118338		44.69	0.04	15.33	0.23	0.01	39.97	0.25	100.55		83.8696
Orapa-41-OL18-core2 - 1	100	783.453	29.3769		1.23279	212.276	5.79367	439.571	3.76279	136.3	2.61206	57.3494	1518.56	149.925	1820.97	0.374107	127.949	0.337778	6.43892	0.13131	1.40429	2.00656	7.61245											83.87
Orapa-41-OL20-core1 - 1	100	649.346	22.0399		0.604636	30.3375	1.47562	157.771	3.95262	73.3797	2.0297	17.6395	1957.35	165.408	1257.9	0.117894	134.485	0.014556	0.02029	0.00885812	0.247588	0.691121	0.0566737		40.65	0.04	19.93	0.25	0	38.89	0.16	99.96		78.4289
Orapa-41-OL22-core1 - 1	100	690.103	24.2635		0.619413	44.0064	2.32873	151.688	3.59006	121.27	2.16633	62.5007	1413.28	158.312	2453.28	0.305003	106.547	< LOD	0.0581345	0.00502114	0.316016	0.41908	0.100558		45.26	0.01	13.95	0.18	0.02	39.9	0.32	99.66		85.2611
Orapa-41-OL26-core1 - 1	100	832.507	32.0754		0.857439	100.595	8.78934	345.025	3.37489	129.954	3.54574	301.237	1156.07	158.188	2463.4	0.725703	89.619	0.119831	1.82204	0.0269384	0.525686	0.742104	2.09622		46.58	0.19	12.23	0.14	0.03	40.37	0.31	99.96		87.1582
Orapa-41-OL26-core2 - 1	70	710.894	25.3999		0.989739	66.5275	2.89622	194.701	4.88346	108.581	1.88424	62.0816	1113.55	151.472	2317.94	0.891648	94.8802	0.105514	1.43684	0.0180936	0.3228	0.652177	1.18096											87.16
Orapa-41-OL28-core1 - 1	100	702.63	24.948		0.900319	47.0499	2.65869	149.641	3.74204	111.771	2.02501	41.981	1440.19	154.719	1263.12	0.305387	94.6552	0.0226568	0.0958762	0.00574257	0.341425	0.738937	0.123127		46.24	0.03	13.39	0.17	0.01	40.53	0.17	100.59		86.0217
Orapa-41-OL33-core1 - 1	100	667.529	23.0312		1.27534	43.2303	1.81763	147.007	3.84994	58.8634	2.09311	35.0523	1655.09	139.412	2515.3	0.2559	106.009	0.0376084	0.792934	0.0184746	0.269143	0.963801	0.856467		46.18	0.01	13.24	0.19	0.01	40.21	0.33	100.21		86.1477
Orapa-41-OL34-core1 - 1	100	1570.25	73.6102		1.75538	296.795	311.79	711.561	3.99859	168.614	10.6152	191.546	895.106	167.012	3155.21	8.88375	113.286	0.088599	1.06129	0.0616009	0.509722	0.0896111	0.903776		47.7	0.1	11.33	0.11	0.03	40.45	0.43	100.22		88.2368
Orapa-41-OL34-core2 - 1	100	1529.37	71.2625		1.59954	348.02	276.512	664.646	3.97106	163.976	10.5191	190.591	897.97	166.335	3149.47	8.70186	112.773	0.0102767	0.0785839	0.0463137	0.241388	0.0163586	0.137538											88.24
Orapa-41-OL35-core1 - 1	100	713.794	25.5585		0.822251	63.9694	2.98348	173.98	3.7173	97.7158	1.81726	41.0289	1518.28	165.717	1476.18	0.31492	115.177	0.0392266	0.573663	0.0159152	0.370482	0.592714	0.804689		44.42	0.02	15.51	0.2	0	39.79	0.19	100.18		83.613
Orapa-41-OL36-core1 - 1	100	1373.89	62.3813		1.36602	216.437	165.603	455.433	3.95967	221.901	12.073	77.8983	1048.07	182.991	2353.62	6.48555	118.763	0.00848386	0.0227364	0.0216697	0.189321	0.0248225	0.021844		45.99	0.08	13.48	0.15	0.01	40.21	0.29	100.34		85.88
Orapa-41-OL38-core1 - 1	100	1492.29	69.137		1.5368	287.138	246.747	768.022	4.12062	206.218	11.5644	199.531	928.694	174.327	2985.52	6.39421	105.514	0.247064	2.88925	0.0851005	1.19777	0.418377	3.66279		47.35	0.1	11.44	0.11	0.03	40.48	0.38	99.98		88.0658
Orapa-41-OL39-core1 - 1	100	546.912	16.4754		1.65897	23.5175	0.383195	98.4639	3.94284	68.4107	0.944676	23.1919	1802.53	134.494	2337.72	0.0538894	117.489	< LOD	0.108997	0.00928025	0.161794	2.22666	0.222107		47.25	0.01	11.72	0.23	0.01	40.69	0.3	100.24		87.784
Orapa-41-OL40-core1 - 1	70	934.662	37.7204		0.921325	49.2593	18.7623	306.442	5.8766	143.586	3.57383	189.129	1325.31	154.252	1536.13	1.98693	111.533	< LOD	0.0602275	0.0166767	0.642988	0.232963	0.0636515		43.84	0.03	16.24	0.19	0.03	39.77	0.17	100.31		82.8004
Orapa-41-OL40-core2 - 1	70	720.193	25.9086		0.836295	43.7589	3.18344	155.51	5.26666	95.7631	2.24607	34.972	1437.65	159.815	1294.71	0.294811	130.556	< LOD	0.00692295	0.0103986	0.2116	0.24144	0.0163105											82.8
Orapa-41-OL41-core1 - 1	100	698.019	24.696		1.3104	46.2899	2.53315	151.185	3.6356	126.748	1.9161	61.7824	1387.44	159.535	2256.55	0.536143	113.021	< LOD	0.0572248	0.00695685	0.352751	0.769396	0.0710246		45.97	0.03	13.45	0.15	0.01	40.1	0.29	100.05		85.906
Orapa-41-OL41-core2 - 1	100	806.968	30.6695		1.33613	166.023	7.10869	466.242	3.6757	224.195	3.02384	154.015	1398.99	159.762	2268.6	0.61921	112.863	0.308901	5.37275	0.104531	1.43846	2.41387	6.4413											85.91
Orapa-41-OL42-core1 - 1	100	986.055	40.5732		0.83159	69.0705	26.2153	333.895	3.63409	167.289	4.51025	422.217	1372.13	156.503	1662.73	0.370655	94.017	0.206297	0.952205	0.0180227	0.700584	0.846339	0.797902		44.24	0.06	15.62	0.18	0	39.82	0.15	100.12		83.4707
Orapa-41-OL45-core1 - 1	100	710.019	25.352		1.19678	97.2098	2.87028	222.728	3.80703	93.3926	2.16112	32.2254	1667.32	167.986	1416.72	0.406678	154.186	0.115288	1.76842	0.0356238	0.577343	0.815704	2.31387		42.07	0.03	18.23	0.2	0	39.29	0.17	100.01		80.4457
Orapa-41-OL46-core1 - 1	100	668.49	23.0836		0.960953	41.3193	1.83735	138.569	3.70052	98.2681	1.34579	47.9053	1271.69	167.817	2103.14	0.3269	90.6991	< LOD	0.00412908	0.00500586	0.261178	0.500309	0.0491189		46.62	0.02	13.27	0.17	0.01	40.31	0.29	100.71		86.2352
Orapa-41-OL49-core1 - 1	100	792.442	29.8708		0.578728	112.735	6.27161	262.16	3.48501	106.252	2.43095	56.1204	1328.04	165.22	1771.89	0.760611	112.865	0.146843	2.32477	0.0436464	0.958553	0.577463	3.2076		44.45	0.02	15.1	0.16	0	39.66	0.24	99.64		84.0047
Orapa-41-OL49-core2 - 1	70	732.281	26.5703		1.09455	94.3405	3.59039	207.232	5.08524	145.06	2.59878	58.7878	1287.02	158.279	1677.14	0.758932	121.892	0.201991	2.33337	0.0183668	0.385924	0.75654	2.59912											84
Orapa-41-OL51-core1 - 1	70	569.384	17.6932		1.36606	19.1263	0.529839	128.626	5.50984	51.0164	1.13468	33.5158	1552.78	126.778	2444.97	0.114597	126.386	< LOD	0.0115373	0.00713991	0.177037	1.05667	0.0219144		47.04	0.02	12.07	0.19	0	40.69	0.32	100.34		87.4209
Orapa-41-OL51-core2 - 1	70	688.402	24.1706		1.30993	41.5947	2.28657	136.435	5.44543	44.4024	1.12425	32.663	1549.62	128.009	2514.17	0.146974	135.196	0.00981972	0.0314175	0.0104287	0.185498	0.734242	0.0609061											87.42
Orapa-41-OL53-core1 - 1	100	1384.35	62.9761		1.59787	227.843	171.942	469.257	3.9725	207.095	12.1169	94.6417	1035.07	181.964	2519.24	6.86161	115.675	< LOD	0.0172817	0.0213557	0.169223	0.0251989	0.0419578		46.32	0.08	13.11	0.13	0.01	40.55	0.32	100.62		86.2978
Orapa-41-OL56-core1 - 1	70	857.672	33.4628		0.985125	56.4324	10.7316	231.937	5.21424	130.091	2.35614	89.7063	1243.57	151.964	1860.5	1.49522	100.739	0.0977936	0.852323	0.0133867	0.584098	0.160109	1.05111		46.55	0.11	13.17	0.16	0.04	40.44	0.18	100.73		86.299
Orapa-41-OL58-core1 - 1	100	768.474	28.5545		1.23565	42.5409	5.06118	160.772	3.77687	92.7953	1.8711	41.0005	1548.06	169.768	1849.92	0.34714	118.398	< LOD	0.00446377	0.00616635	0.301447	0.51714	0.0101711		44.21	0.04	15.56	0.19	0.01	39.8	0.23	100.05		83.5172
Orapa-41-OL58-core2 - 1	70	668.668	23.0933		1.65744	36.1323	1.84102	165.683	5.60289	105.023	1.8872	42.6317	1516.92	166.51	1833.95	0.395637	125.677	0.0100402	0.0014638	0.00517841	0.330235	0.598922	< LOD											83.52
Orapa-41-OL59-core1 - 1	100	718.499	25.8159		0.87022	70.4656	3.12948	179.524	3.69911	108.428	2.24021	56.9824	1452.58	154.958	1606.83	2.46096	99.0163	0.0319226	1.00384	0.0184571	0.445464	0.676206	1.38611		46.06	0.02	13.1	0.18	0.01	40.21	0.2	99.83		86.2456
Orapa-41-OL60-core1 - 1	100	714.524	25.5984		1.45111	42.0907	3.00576	138.515	3.74751	108.162	1.58587	48.3752	1255.07	164.643	2298.4	0.459283	94.5184	< LOD	0.00780056	0.00515866	0.360226	0.725994	0.147549		46.15	0.03	13.17	0.15	0	40.3	0.28	100.11		86.1972
Orapa-41-OL61-core1 - 1	100	735.827	26.7645		1.29584	42.4171	3.71727	138.223	3.0804	92.2548	1.69347	46.7697	1312.23	143.6	2414.05	0.407325	101.277	< LOD	0.0119334	0.00591458	0.257914	1.09117	0.0274365		47.09	0.01	12.02	0.16	0.02	40.4	0.31	100.05		87.4794
Orapa-41-OL62-core1 - 1	100	974.413	39.9262		0.684541	43.1383	24.3618	173.647	3.76809	111.952	3.72492	292.817	1351.56	167.961	1971.92	0.470472	103.13	0.268451	0.379248	0.0177894	0.296596	0.510001	0.632526		45.38	0.03	13.9	0.16	0.02	40.07	0.24	99.84		85.3441
Orapa-41-OL62-core2 - 1	100	656.728	22.4422		0.793521	28.4401	1.60752	163.566	3.78405	93.7636	1.84051	50.5964	1385.59	164.257	1928.57	0.288707	99.4601	0.0101089	0.0602039	0.0077195	0.274038	0.53297	0.0514482											85.34
Orapa-41-OL63-core1 - 1	100	1468.35	67.7676		1.43521	252.677	228.656	548.628	3.96376	166.556	11.8545	158.156	969.586	170.368	2922.51	7.52789	101.985	< LOD	0.0577143	0.0248825	0.149628	0.0143404	0.0112356		47.37	0.08	11.52	0.12	0.03	40.62	0.37	100.21		87.9987
Orapa-41-OL63-core2 - 1	100	1470.75	67.9043		1.40246	263.692	230.425	542.2	3.96403	166.5	11.9826	157.948	964.532	169.919	2916.86	7.50957	101.498	< LOD	0.0253661	0.0236025	0.142103	0.0140003	0.0252012											88
Orapa-41-OL66-core1 - 1	100	730.286	26.4611		1.24554	100.94	3.52052	222.355	3.45387	112.256	1.98315	58.6328	1498.8	149.624	2235.86	0.406246	126.956	0.102837	2.26704	0.0398456	0.528156	1.16141	6.05385		45.18	0.01	14.32	0.16	0.02	40.08	0.27	100.07		84.9074
Orapa-41-OL66-core2 - 1	100	750.364	27.5611		1.14719	78.8797	4.27532	222.956	3.46252	114.445	2.02006	58.1832	1479.36	147.866	2203.3	0.403012	124.554	0.0859905	1.14491	0.0258327	0.545807	1.08087	1.29559											84.91
Orapa-41-OL68-core1 - 1	100	743.752	27.1987		1.31042	163.765	4.01381	310.403	3.8527	97.6918	2.1318	30.4956	1706.03	169.939	1072.99	0.385183	155.333	0.198687	5.04481	0.0911633	0.849391	1.04285	6.30839		42.02	0.02	18.59	0.19	0	39.18	0.14	100.18		80.1173
Orapa-41-OL68-core2 - 1	100	763.772	28.2965		1.08404	173.419	4.84703	322.413	3.76967	145.973	2.38846	33.5967	1689.64	168.783	1060.4	0.42636	155.427	0.21197	5.16899	0.0949361	0.96263	1.58517	6.46321											80.12
Orapa-41-OL71-core1 - 1	70	800.376	30.307		1.19014	135.076	6.71868	337.426	5.4593	108.118	2.28905	36.3928	1559.36	170.813	1309.76	0.60537	151.169	0.29025	4.2311	0.0739607	1.42932	1.40793	5.77635		43.12	0.03	16.97	0.2	0.02	39.46	0.16	99.97		81.9148
Orapa-41-OL71-core2 - 1	70	784.279	29.4223		1.35839	143.018	5.83632	353.821	5.5797	114.584	2.30479	36.7444	1535.85	168.972	1340.73	0.657815	135.659	0.249576	4.63265	0.0844839	1.32579	1.36031	5.6429											81.91
Orapa-41-OL73-core1 - 1	100	698.403	24.717		1.76707	54.2676	2.54342	119.236	3.70143	63.5072	1.66746	34.2703	1586.95	139.335	2547.48	0.159184	112.751	< LOD	0.0139939	0.00833839	0.178638	1.08329	0.0234955		46.71	0.01	12.64	0.17	0.02	40.21	0.31	100.13		86.8158
Orapa-41-OL75-core1 - 1	100	706.796	25.1758		0.990761	60.3473	2.7764	183.28	4.01948	97.0465	2.03074	39.8682	1611.81	168.96	1243.95	0.325569	115.049	0.0238571	0.347357	0.0134057	0.420962	0.634212	0.417099		43.74	0.02	16.55	0.21	0.01	39.77	0.15	100.51		82.4976
Orapa-41-OL84-core1 - 1	100	662.896	22.7785		1.22789	53.4286	1.72494	151.823	3.73413	89.1328	1.70218	37.3031	1563.51	161.608	1600.92	0.341806	106.315	< LOD	0.0415991	0.00610961	0.283422	0.614643	0.0310326		44.21	0.02	15.53	0.19	0.01	39.64	0.18	99.82		83.54
Orapa-41-OL85-core1 - 1	100	666.009	22.9483		1.73544	36.7387	1.78678	111.49	3.71248	64.6597	1.72923	36.3159	1754.36	141.019	2725.59	0.371368	131.136	< LOD	0.0170266	0.00561283	0.204443	1.05883	0.0378929		45.67	0.01	13.81	0.21	0	40.14	0.35	100.23		85.4907
Orapa-41-OL87-core1 - 1	100	709.633	25.3309		1.53422	52.9489	2.85891	160.46	3.75671	91.5748	1.9593	16.4821	1791.78	178.491	828.677	0.482036	168.692	< LOD	0.0043775	0.00661271	0.358631	0.432276	< LOD		40.46	0.04	20.43	0.24	0	38.95	0.09	100.24		77.9279
Orapa-41-OL88-core1 - 1	100	636.279	21.3281		1.38566	41.9233	1.26374	189.739	4.57029	40.4347	0.823771	14.0199	2251.29	142.539	2463.61	0.16082	142.578	0.0306563	0.744843	0.0176874	0.295833	1.46331	0.745689		42.6	0.02	17.44	0.3	0.01	39.33	0.26	99.99		81.331
Orapa-41-OL90-core1 - 1	100	666.622	22.9818		2.02077	21.8936	1.79919	93.3221	3.55439	52.0069	1.7457	39.3231	1427.86	141.953	2611.44	0.35348	88.2421	< LOD	0.0049715	0.00753968	0.127942	2.75688	0.0112206		47.59	0.02	11.39	0.17	0.01	40.44	0.34	99.99		88.1561

## Sheet: Karowe
Dataset 1e. EPMA, LA-ICP-MS and Al-in-olivine thermometry data for Karowe kimberlite.
					LA-ICP-MS data done at Stellenbosch - See methods.																				EPMA data done at University of Joburg - See methods.
	Spot Size (µm)	T (°C)	P (kbars)		Li	Na	Al	Ca	Sc	Ti	V	Cr	Mn	Co	Ni	Cu	Zn	Rb	Sr	Y	Zr	Nb	Ba		MgO	CaO	FeO	MnO	Cr2O3	SiO2	NiO	Total		Mg#
Peridotitic olivine
PLT-17-04-OL3-core1 - 1	100	1006.26	41.6969		< LOD	83.4041	29.6772	119.978	3.65734	184.21	3.04901	189.618	820.092	139.727	3115.3	1.41231	52.6251	< LOD	0.0139348	0.00530195	0.373933	0.713144	< LOD		50.55	0.02	7.74	0.11	0.03	41.03	0.39	99.93		92.097
PLT-17-04-OL6-core1 - 1	100	1067.05	45.0865		0.372566	265.837	42.1316	363.162	2.86923	26.3736	5.97041	211.994	778.828	141.063	3163.81	1.57537	52.5009	0.620152	5.38702	0.0357744	0.807619	1.02339	8.49377		50.67	0.03	7.63	0.09	0.04	41.23	0.38	100.11		92.2104
PLT-17-04-OL8-core1 - 1	100	1026.24	42.8101		< LOD	78.1032	33.4236	153.326	4.78785	3.27887	5.34822	321.1	732.091	127.107	2930.88	0.909115	40.3414	0.0241543	0.182811	0.00685703	0.282107	0.269424	0.2786		51.7	0.04	6.38	0.08	0.06	41.51	0.37	100.19		93.5252
PLT-17-04-OL15-core1 - 1	100	1439.52	66.1205		0.918771	291.85	208.014	537.237	4.07075	163.635	12.3148	733.852	931.781	146.744	3125.36	6.48263	61.7904	0.0487865	0.534203	0.022394	0.19967	0.0984676	0.659846		49.6	0.07	8.78	0.12	0.08	40.91	0.4	100.02		90.9605
PLT-17-04-OL17-core1 - 1	100	1459.55	67.2643		0.813043	262.601	222.221	605.756	3.76174	139.8	12.2254	370.244	934.594	154.274	2948.57	5.49325	78.717	0.0409255	0.383925	0.0288261	0.162397	0.0596353	0.495045		48.54	0.11	10.06	0.12	0.04	40.6	0.39	99.97		89.5839
PLT-17-04-OL21-core1 - 1	100	1456.05	67.0641		1.10073	257.339	219.692	573.367	3.68767	147.54	11.937	266.222	992.777	167.822	2886.04	4.30396	98.7173	0.0771806	0.949998	0.0319448	0.235783	0.137432	0.859514		48.34	0.06	10.21	0.14	0.04	40.62	0.4	99.9		89.4021
PLT-17-04-OL23-core1 - 1	100	853.257	33.2193		0.320417	23.1622	10.3689	85.1777	2.93298	68.2807	1.33611	31.5575	849.893	135.42	2711.64	0.339752	53.584	< LOD	0.257003	0.00336897	0.0414082	0.150954	0.0604437		50.45	0.02	8.06	0.1	0	41.05	0.36	100.08		91.7803
PLT-17-04-OL24-core1 - 1	100	1413.11	64.6141		< LOD	205.182	190.191	541.916	3.82981	159.428	11.3075	326.776	1002.5	170.362	2764.33	2.71654	88.0371	0.00945124	0.0863925	0.0214335	0.113867	0.0267487	0.0952459		48.63	0.07	10.07	0.1	0.05	40.77	0.36	100.15		89.5879
PLT-17-04-OL26-core1 - 1	100	1490.85	69.0545		0.662794	257.519	245.633	607.543	3.80157	127.584	12.1233	370.007	941.449	156.143	2974.51	6.4898	79.8047	< LOD	0.0173369	0.0216608	0.105849	0.0137804	0.0166122		48.54	0.11	10.07	0.11	0.04	40.64	0.4	99.99		89.572
PLT-17-04-OL29-core1 - 1	100	1217.95	53.5533		0.979826	145.302	88.7261	273.984	3.45734	272.541	10.3355	214.586	942.182	150.259	3153.58	4.96248	72.7526	< LOD	0.00180836	0.0103903	0.187436	0.059929	0.00339209		49.04	0.04	9.62	0.12	0.02	40.92	0.38	100.24		90.083
PLT-17-04-OL31-core1 - 1	100	1031.65	43.1112		< LOD	94.4263	34.4933	127.224	2.78175	24.6308	5.6485	218.226	751.382	142.405	3353.02	1.20589	49.5348	< LOD	0.0960224	0.00287866	0.276435	0.477974	0.120088		50.98	0.02	7.37	0.1	0.04	41.37	0.44	100.37		92.4965
PLT-17-04-OL31-core2 - 1	100	1046.33	43.9298		< LOD	91.0658	37.526	123.016	2.77153	23.7975	5.66797	218.007	749.302	142.144	3345.77	1.06478	49.9892	< LOD	0.0023776	0.00264002	0.275275	0.451811	< LOD		50.96	0.03	7.33	0.09	0.03	41.3	0.45	100.22		92.5306
PLT-17-04-OL31-core3 - 1	100	1031.6	43.1086		< LOD	91.9641	34.484	125.053	2.79245	25.1555	5.69047	218.343	750.77	142.17	3352.85	1.02461	50.0053	< LOD	0.0248626	0.00240799	0.278181	0.461344	0.0586633		50.86	0.03	7.47	0.09	0.03	41.25	0.39	100.17		92.3837
PLT-17-04-OL40-core1 - 1	100	1320.6	59.3554		0.958364	207.285	135.684	403.103	3.60291	226.553	12.1557	250.127	968.74	148.28	3147.72	3.7169	83.0625	0.00510515	0.41942	0.0164493	0.146494	0.0339355	0.0738549		48.64	0.07	10.13	0.12	0.04	40.79	0.38	100.28		89.5316
PLT-17-04-OL41-core1 - 1	100	1064.87	44.9648		< LOD	103.082	41.6287	155.219	3.02601	169.822	6.2261	217.09	782.84	140.754	3217.07	1.544	53.1091	< LOD	0.00357976	0.00294168	0.235558	0.191348	< LOD		50.85	0.02	7.68	0.08	0.04	41.36	0.42	100.52		92.1879
PLT-17-04-OL43-core1 - 1	100	1032.96	43.1846		1.35222	267.093	34.7576	427.375	3.64039	188.777	3.61299	164.609	919.38	144.473	3288.29	0.896986	59.2312	0.496762	7.76368	0.105786	1.80782	1.80336	10.2267		50.25	0.03	8.35	0.12	0.03	41.08	0.37	100.34		91.4732
PLT-17-04-OL46-core1 - 1	100	964.069	39.3517		< LOD	104.919	22.7983	196.374	3.17009	217.245	3.13866	97.5983	1103.94	138.323	3065.83	1.17523	85.5227	0.102042	1.83015	0.0226441	0.56253	0.782661	2.64645		49.54	0.02	9.28	0.13	0.02	41.18	0.42	100.65		90.4938
PLT-17-04-OL46-core2 - 1	100	946.835	38.3953		< LOD	109.276	20.3616	207.179	3.12506	215.725	3.07191	95.5861	1088.65	136.08	3024.4	1.32653	84.1476	0.112073	2.16073	0.0272116	0.642311	0.869019	3.12651		49.16	0.02	9.22	0.13	0.02	40.82	0.4	99.89		90.478
PLT-17-04-OL55-core1 - 1	100	967.5	39.5422		1.02647	105.744	23.3083	207.024	3.29962	182.517	3.70818	141.267	1094.84	142.862	2905.65	1.14389	85.6691	0.0696883	0.867732	0.0157795	0.592715	0.602399	1.16574		48.77	0.04	10.09	0.15	0.01	40.76	0.38	100.26		89.6046
PLT-17-04-OL67-core1 - 1	100	1070.23	45.2646		1.16302	138.009	42.875	209.836	3.03547	155.407	5.99935	248.917	756.21	138.847	3218.7	3.2937	50.1152	0.140122	1.10813	0.0171555	0.517621	0.376813	1.73285		50.97	0.03	7.47	0.09	0.04	41.37	0.41	100.46		92.3997
PLT-17-04-OL68-core1 - 1	100	1105.49	47.2363		< LOD	217.816	51.7401	341.661	2.97635	92.9257	4.889	284.299	763.569	138.492	3164.79	4.01054	49.6114	0.233339	2.42217	0.0348947	0.628187	0.526958	3.37971		51.02	0.03	7.23	0.1	0.04	41.43	0.37	100.27		92.6366
PLT-17-04-OL69-core1 - 1	100	1121.36	48.1256		1.48249	218.464	56.1331	430.481	3.36897	244.169	5.50086	266.615	885.937	138.816	3168.56	4.54009	53.5229	0.379837	3.42721	0.054272	0.752703	0.65839	4.5304		50.75	0.03	7.74	0.12	0.03	41.28	0.41	100.43		92.1255
PLT-17-04-OL73-core1 - 1	100	680.13	23.7189		< LOD	31.7725	2.09029	110.779	3.59667	134.02	2.32013	70.1271	998.565	127.515	2470.67	0.135272	54.349	< LOD	0.012065	0.00273688	0.237766	0.933763	0.0187079		50.36	0.19	7.77	0.13	0.01	41.11	0.31	99.97		92.0342
PLT-17-04-OL75-core1 - 1	100	1360.79	61.6365		0.308237	222.112	157.879	436.745	3.93295	196.691	11.8816	344.13	926.931	146.721	3020.18	6.21739	63.9861	< LOD	0.114394	0.0150448	0.130871	0.0245491	0.00985263		48.38	0.16	9.12	0.12	0.05	40.14	0.41	98.58		90.437
PLT-17-04-OL77-core1 - 1	100	1341.83	60.5599		1.28664	287.136	147.132	444.681	3.63171	189.352	11.3116	785.314	945.277	148.827	3061.6	7.44098	66.9572	< LOD	0.00525699	0.015353	0.12595	0.0261078	0.00612857		49.3	0.07	9.56	0.1	0.12	41.2	0.39	100.84		90.1906
PLT-17-04-OL84-core1 - 1	100	1099.66	46.91		0.638425	143.118	50.1908	269.922	3.13735	221.077	4.7834	191.422	754.684	137.142	3097.96	3.73441	52.6976	0.184473	1.57943	0.0261518	0.538351	0.455461	2.07396		50.71	0.04	7.55	0.12	0.01	41.39	0.42	100.31		92.2902
PLT-17-04-OL84-core2 - 1	100	1092.65	46.5181		0.343295	104.052	48.3735	182.355	3.1597	218.49	4.81558	192.618	758.127	138.177	3127.71	3.45718	53.1821	0.00793922	0.0912901	0.00649321	0.273419	0.170532	0.0635001		50.95	0.03	7.59	0.09	0.02	41.47	0.4	100.66		92.2887
PLT-17-04-OL86-core1 - 1	100	1051.66	44.2275		< LOD	100.427	38.6747	151.28	3.0397	153.88	5.87588	234.153	751.654	142.469	3231.85	2.74341	54.6113	< LOD	0.00170618	0.0036121	0.254163	0.269649	< LOD		50.44	0.02	7.66	0.08	0.05	41.35	0.38	100.08		92.1409
PLT-17-04-OL91-core1 - 1	100	784.825	29.4523		< LOD	15.9311	5.86468	75.4186	4.05737	4.57224	0.906373	25.9506	742.534	133.929	3285.9	0.245598	35.3836	0.0428564	0.324216	0.00515502	0.0440845	0.235861	0.472325		51.7	0.01	6.64	0.08	0	41.83	0.39	100.67		93.2817
PLT-17-04-OL97-core1 - 1	100	1374.85	62.4358		1.57368	236.735	166.177	442.28	3.78471	183.522	12.3577	307.935	968.786	151.435	3049.3	5.87495	85.8613	< LOD	0.00750823	0.0162928	0.120848	0.0215573	0.0261669		48.3	0.07	10.51	0.12	0.05	40.88	0.38	100.43		89.1185
PLT-17-04-OL97-core2 - 1	100	1372.14	62.2819		0.770454	446.253	164.559	458.414	3.80173	185.04	12.2876	309.998	969.396	151.252	3056.53	5.07196	85.7384	< LOD	0.59991	0.016416	0.122834	0.0221293	0.346087		48.33	0.05	10.41	0.1	0.03	40.79	0.38	100.28		89.2202
PLT-17-04-OL101-core1 - 1	100	1054.84	44.4049		< LOD	108.495	39.3713	150.408	2.99701	171.36	4.11721	244.644	773.335	135.292	3029.85	2.20814	52.3324	< LOD	0.00903671	0.0037359	0.204132	0.154917	0.0108185		50.77	0.02	7.49	0.1	0.03	41.49	0.38	100.36		92.36
PLT-17-04-OL101-core2 - 1	100	1056.45	44.4947		0.336997	108.395	39.7274	154.99	2.99371	170.758	4.13574	244.785	773.542	135.154	3031.8	2.20895	52.344	< LOD	0.00504523	0.00388005	0.197786	0.161367	0.0119332											92.36
PLT-17-04-OL116-core1 - 1	100	1098.42	46.8405		0.551299	135.045	49.865	184.908	3.07175	151.173	5.77187	271.673	829.523	147.097	3162.51	0.729623	63.814	0.0170134	0.107403	0.00403489	0.210385	0.180408	0.302973		50.17	0.04	8.12	0.11	0.03	41.2	0.38	100.1		91.6775
PLT-17-04-OL117-core1 - 1	100	1436.85	65.968		1.06688	284.145	206.164	559.83	4.46398	144.328	11.6501	663.167	952.652	146.067	3129.21	6.21165	66.5109	0.00964413	0.0170851	0.0227929	0.149427	0.0128066	0.113739		49.4	0.11	9.11	0.12	0.1	40.8	0.38	100.09		90.6264
PLT-17-04-OL121-core1 - 1	100	1068.92	45.1915		0.890478	125.15	42.5687	216.805	3.13376	216.19	5.16398	217.368	871.108	137.822	3129.38	2.0316	62.419	0.123779	0.908073	0.0132813	0.409752	0.310136	1.42966		51.09	0.04	6.99	0.1	0.02	41.27	0.39	99.96		92.8642
PLT-17-04-OL121b-core1 - 1	100	1070.42	45.2753		< LOD	90.5523	42.9197	163.984	2.76788	6.75165	5.71697	237.066	706.064	130.511	3004.39	1.73005	48.2313	< LOD	0.00249811	0.000609	0.0184513	0.105134	< LOD											92.86
PLT-17-04-OL121-core2 - 1	100	1172.63	51.0028		1.13147	493.971	72.1304	686.748	3.17123	232.265	6.37924	216.042	870.532	137.811	3124.94	2.79864	62.7575	2.57516	17.8025	0.079722	1.33821	2.3215	29.7671											92.86
PLT-17-04-OL123-core1 - 1	100	1300.41	58.2113		0.7586	181.078	125.365	367.423	3.65856	195.946	10.8784	220.639	940.434	153.284	2840.37	5.51375	78.5394	< LOD	0.0067926	0.0103288	0.124954	0.0352766	0.0481969		48.56	0.04	10.13	0.12	0.02	40.46	0.33	99.77		89.5156
PLT-17-04-OL123-core2 - 1	100	1299.79	58.1762		0.991251	183.466	125.057	373.749	3.65519	197.385	10.9974	222.228	945.738	154.147	2848.31	5.6005	79.6675	< LOD	0.00595172	0.0103056	0.13714	0.0331306	0.0560177		48.37	0.06	10.11	0.14	0.02	40.58	0.34	99.71		89.5041
PLT-17-04-OL123-core3 - 1	100	1298.47	58.1015		1.15748	183.734	124.402	369.863	3.65166	194.991	10.825	220.151	940.18	152.595	2832.28	5.44623	78.5576	< LOD	0.00649483	0.00952132	0.121951	0.0366963	0.0557358											89.51
PLT-17-04-OL123-core4 - 1	100	1301.29	58.2616		1.1017	185.946	125.807	372.917	3.62583	196.781	10.9104	221.232	942.919	153.482	2837.13	5.4488	79.0744	< LOD	0.00779858	0.00966597	0.1326	0.0368621	0.0553119											89.52
PLT-17-04-OL128-core - 1	100	1284.55	57.314		1.00364	188.435	117.644	358.197	3.62243	174.554	9.74297	415.617	880.282	144.707	3071.28	5.79762	59.8846	< LOD	0.00399271	0.00807356	0.12141	0.0336296	< LOD		49.84	0.05	8.46	0.12	0.05	41.15	0.39	100.13		91.2996
PLT-17-04-OL128-core2 - 1	100	1285	57.3394		1.00252	188.88	117.857	361.531	3.58545	174.865	9.71622	417.14	880.454	144.223	3062.26	5.82819	59.8562	< LOD	0.00389575	0.00610097	0.126578	0.0381897	0.00477269											91.3
PLT-17-04-OL131-core1 - 1	70	692.642	24.4022		2.01849	49.6767	2.39278	138.942	5.23561	34.0093	1.66248	77.9951	924.204	129.503	2760.19	0.272711	50.8189	0.035133	0.408619	0.00757475	0.236827	0.599074	0.510796		51.07	0.02	7.16	0.11	0.01	41.41	0.37	100.18		92.7039
PLT-17-04-OL132-core1 - 1	100	851.985	33.1491		< LOD	8.74937	10.2662	70.7027	3.02984	14.1914	1.80949	36.268	742.491	136.25	3257.6	0.366043	40.0186	< LOD	0.000813601	0.000340123	0.0356733	0.658747	< LOD		50.93	0.02	7.17	0.11	0	41.04	0.44	99.72		92.6841
PLT-17-04-OL136-core1 - 1	100	1331.67	59.9834		< LOD	113.923	141.577	496.449	3.80585	8.25677	10.2862	774.641	964.624	144.073	3070.46	4.67558	55.9568	< LOD	0.00731469	0.0122533	0.0596296	0.0217565	0.012966		49.79	0.07	8.5	0.14	0.1	41.2	0.36	100.2		91.2702
PLT-17-04-OL136-core2 - 1	100	1337.97	60.3409		0.38127	474.446	145.005	560.916	3.75972	9.63144	13.5749	775.583	960.813	143.594	3054.08	5.85703	55.5354	1.75158	14.4475	0.0135933	0.080192	0.315027	29.5872		49.85	0.08	8.5	0.09	0.08	41.06	0.37	100.09		91.2661
PLT-17-04-OL144-core1 - 1	100	1399.3	63.8273		1.39616	339.731	181.279	499.698	4.42562	168.556	11.8057	753.977	949.761	143.041	3063.76	7.54319	64.5683	0.00993519	0.0272562	0.0166266	0.148305	0.0131013	0.214963		49.1	0.07	9.03	0.11	0.09	40.93	0.36	99.78		90.6472
Spinel-bearing peridotites (Mn > 1160 ppm and Al < 10 ppm)
PLT-17-04-OL9-core1 - 1	100	720.388	25.9193		0.245718	44.2147	3.18971	126.299	2.86853	126.112	1.37213	35.1928	1186.78	143.483	2473.46	0.225873	75.7002	< LOD	0.0523494	0.00571475	0.276129	1.23038	0.185062		48.91	0.02	9.7	0.17	0	40.93	0.31	100.08		89.987
Cr-poor olivine megacrysts
PLT-17-04-OL1-core1 - 1	70	1311.92	58.8637		0.823102	201.86	131.183	426.36	5.46578	208.572	12.411	125.362	995.234	170.386	2419.71	3.85082	113.844	< LOD	0.0587463	0.0166552	0.122369	0.0333625	0.0397367		46.37	0.06	12.69	0.13	0.02	40.23	0.3	99.9		86.6831
PLT-17-04-OL1-core2 - 1	70	1325.05	59.6075		0.790984	195.2	138.03	425.541	5.58983	216.723	12.8815	127.859	1023.97	171.052	2408.18	2.28533	112.689	< LOD	0.00878522	0.0145731	0.129829	0.0355319	< LOD											86.68
PLT-17-04-OL1-core3 - 1	70	1389.82	63.2875		0.871781	211.802	175.321	519.966	5.60908	179.688	12.0997	171.923	999.969	173.354	2233.32	3.20949	111.437	0.005756	0.101961	0.0236508	0.131232	0.0269556	0.0491337											86.68
PLT-17-04-OL2-core1 - 1	100	1378.47	62.6416		1.10332	243.353	168.358	484.237	3.71086	194.732	12.4827	321.739	986.968	156.435	3060.48	4.95475	91.4656	0.0467702	0.385615	0.0217701	0.210169	0.0908878	0.598541		47.76	0.07	10.93	0.12	0.05	40.57	0.37	100.01		88.6294
PLT-17-04-OL5-core1 - 1	70	1018.73	42.3917		2.9649	177.842	31.9774	299.053	5.22278	166.6	4.17879	64.719	1371.62	165.933	1507.39	2.41212	161.447	0.231303	2.62176	0.0381197	0.929781	0.856323	3.60984		43.38	0.03	17.02	0.2	0.01	39.38	0.18	100.3		81.9608
PLT-17-04-OL7-core1 - 1	100	1307.53	58.6145		3.08003	152.795	128.94	437.973	3.78471	189.455	8.30978	384.337	1083.45	160.171	2539.43	2.15192	77.4773	< LOD	0.0485332	0.0145778	0.148798	0.0351901	0.0818962		47.55	0.08	11.29	0.13	0.08	40.49	0.36	100.1		88.2397
PLT-17-04-OL10-core1 - 1	100	1374.01	62.3877		1.30773	229.298	165.671	438.446	3.60676	190.179	12.5873	147.762	993.34	173.944	2718.71	5.02538	102.439	< LOD	0.0138617	0.0198465	0.124091	0.020338	0.00633253		46.57	0.12	12.08	0.12	0.02	40.36	0.36	99.72		87.2957
PLT-17-04-OL10-core2 - 1	100	1374.22	62.3999		0.782471	220.344	165.799	447.059	3.59029	191.364	12.5857	147.666	994.577	174.001	2706.55	6.34369	102.576	< LOD	0.0118993	0.018872	0.127207	0.0223852	0.0101377											87.3
PLT-17-04-OL11-core1 - 1	100	1442.08	66.2665		1.95463	244.721	209.795	544.47	3.86343	164.155	13.106	194.31	973.997	166.051	2860.59	0.923853	97.3165	< LOD	0.107009	0.0258077	0.196226	0.00963099	0.127239		47.33	0.09	11.56	0.14	0.03	40.35	0.36	99.94		87.9441
PLT-17-04-OL12-core1 - 1	100	797.996	30.1762		1.44509	78.5067	6.58205	168.532	3.50895	112.883	3.12544	210.175	1490.68	150.254	1518.84	0.315888	122.92	< LOD	0.0137639	0.00405687	0.323345	0.399214	0.0160191		44.9	0.02	15.04	0.19	0.05	39.7	0.2	100.15		84.1795
PLT-17-04-OL13-core1 - 1	70	984.085	40.4637		1.45682	126.328	25.8945	267.952	5.32623	166.969	3.81427	61.7031	1377.52	166.082	1460.26	1.19417	162.338	0.120819	1.55694	0.0274537	0.819657	0.684529	1.99933		43.74	0.04	17.11	0.18	0	39.26	0.21	100.61		82.0066
PLT-17-04-OL14-core1 - 1	70	1434.66	65.8428		1.08138	281.923	204.653	623.276	5.5668	162.18	12.8964	197.449	927.942	163.512	2931.32	3.96411	109.885	0.0582378	2.23591	0.0350733	0.214483	0.114463	0.627687		47.52	0.09	11.55	0.12	0.05	40.53	0.39	100.33		87.9965
PLT-17-04-OL16-core1 - 1	100	1078.28	45.7142		0.826441	84.2075	44.793	297.057	3.82925	234.475	6.13646	201.751	1187.11	175.818	2026.11	3.81894	89.1976	0.018687	0.145818	0.0145573	0.285027	0.118129	0.18617		45.98	0.05	13.66	0.17	0.04	40.19	0.24	100.4		85.7139
PLT-17-04-OL18-core1 - 1	100	1013.52	42.1013		1.23524	156.682	31.0009	366.852	3.41075	200.19	5.18967	90.3829	1162.63	160.383	1765.49	1.45757	109.878	0.244787	4.9296	0.0418568	0.857746	1.02447	6.55588		45.48	0.04	14.21	0.16	0.01	39.9	0.25	100.1		85.0949
PLT-17-04-OL18-core2 - 1	70	991.077	40.8524		1.80149	139.233	27.0464	222.537	5.35262	190.285	5.49567	91.0786	1140.56	156.743	1753.12	3.465	118.294	0.323873	2.72839	0.00922819	0.369806	0.507452	4.71932											85.09
PLT-17-04-OL19-core1 - 1	100	1401.12	63.931		1.00783	224.563	182.439	474.269	3.6	177.077	12.5841	130.451	973.018	174.124	2785.93	3.37268	102.726	0.00997165	0.0522464	0.0204569	0.113491	0.0227965	0.0601541		47.02	0.08	12.1	0.12	0.01	40.43	0.34	100.17		87.3897
PLT-17-04-OL22-core1 - 1	100	978.553	40.1562		0.703945	85.3034	25.0093	168.134	3.34448	193.435	5.02249	67.558	1164.24	166.554	1549.83	0.483563	112.377	< LOD	0.0245592	0.00388371	0.296385	0.364971	0.0171335		45	0.02	14.6	0.15	0	39.84	0.18	99.87		84.6023
PLT-17-04-OL25-core1 - 1	100	982.337	40.3665		< LOD	78.7198	25.6123	172.463	3.31232	198.885	5.07339	87.3172	1130.54	160.916	1724.46	1.37699	102.418	< LOD	0.0502159	0.00428709	0.31416	0.350982	0.0143269		46.35	0.04	13.49	0.16	0.03	40.19	0.25	100.56		85.9597
PLT-17-04-OL28-core1 - 1	100	1467.14	67.6981		< LOD	237.749	227.762	581.263	3.71952	130.239	12.437	161.355	966.076	173.131	2936.71	5.13244	100.707	0.0206098	0.251172	0.0255168	0.0897531	0.0294913	0.336369		47.42	0.1	11.59	0.13	0.03	40.6	0.34	100.32		87.9428
PLT-17-04-OL30-core1 - 1	100	1455.15	67.013		1.37684	257.725	219.049	697.545	3.80351	152.862	11.9938	327.419	973.008	166.003	2898.27	4.37991	89.5986	0.148883	1.43689	0.0399248	0.34568	0.244672	1.89411		47.71	0.09	10.96	0.13	0.06	40.35	0.34	99.86		88.5833
PLT-17-04-OL32-core1 - 1	100	1458.76	67.2194		2.05327	269.625	221.651	529.033	3.67562	160.601	12.8763	165.815	928.33	163.844	2954	4.61533	98.3163	< LOD	0.0147557	0.0228651	0.130007	0.0121741	0.117996		47.5	0.1	11.19	0.11	0.02	40.46	0.37	99.87		88.3235
PLT-17-04-OL33-core1 - 1	100	1354.67	61.289		5.02745	212.395	154.357	512.469	3.76573	173.126	9.69852	437.774	997.954	163.346	3087.48	1.0941	77.1934	0.0422844	0.541712	0.0205923	0.175708	0.092189	0.696206		47.94	0.07	10.8	0.15	0.07	40.62	0.43	100.27		88.7744
PLT-17-04-OL35-core1 - 1	100	1405.11	64.158		1.23596	241.646	184.992	551.646	3.72871	167.566	11.9733	216.099	997.413	173.829	2697.9	1.88389	95.0189	0.0858981	0.66775	0.0279958	0.204831	0.0930675	0.965142		46.95	0.09	12.19	0.12	0.04	40.31	0.32	100.15		87.2804
PLT-17-04-OL36-core1 - 1	100	1201.13	52.6059		1.38424	167.607	82.2864	314.386	3.45007	256.308	10.0468	124.825	1006.51	160.242	2584.54	3.70965	90.1652	0.00859699	0.987266	0.00850275	0.185709	0.0677076	0.119163		47.36	0.05	11.54	0.11	0.02	40.46	0.33	100		87.9751
PLT-17-04-OL37-core1 - 1	70	1041.06	43.6361		2.80028	305.752	36.4165	542.537	5.30648	165.166	3.92534	59.3565	1399.58	159.859	1424.14	1.82631	168.53	0.287823	11.9176	0.0399191	0.988786	1.01647	4.56011		43.08	0.02	17.21	0.18	0.02	39.36	0.17	100.1		81.6905
PLT-17-04-OL38-core1 - 1	70	1334.9	60.1663		0.53699	205.718	143.324	418.801	5.51159	193.647	12.2843	134.397	993.669	172.374	2551.08	1.96461	113.491	< LOD	0.0116838	0.0165638	0.130694	0.0247964	0.0102722		46.76	0.07	12.38	0.13	0.01	40.45	0.31	100.22		87.069
PLT-17-04-OL39-core1 - 1	100	967.507	39.5426		1.57974	121.433	23.3094	178.589	3.3223	202.646	4.34882	103.763	1115.15	150.835	2327.18	0.347554	100.894	0.0322007	0.548255	0.0101859	0.412685	0.543641	0.797547		46.9	0.03	12.76	0.13	0.04	40.33	0.27	100.51		86.756
PLT-17-04-OL39-core2 - 1	70	968.084	39.5746		2.09371	124.072	23.396	171.935	5.26166	197.492	4.43806	112.295	1105.33	149.864	2320.53	0.228144	110.015	0.0288763	0.349151	0.00643749	0.344921	0.507074	0.388317											86.76
PLT-17-04-OL42-core1 - 1	100	1390.59	63.331		2.89774	198.309	175.797	574.147	3.95702	194.087	10.2318	363.471	1047.65	164.669	2697.09	1.92386	82.4744	0.116721	0.988147	0.0344865	0.357303	0.189331	1.24034		46.77	0.05	12.44	0.14	0.01	40.55	0.28	100.34		87.0145
PLT-17-04-OL44-core1 - 1	100	1376.95	62.5552		1.33021	219.011	167.441	449	3.67974	190.366	12.5008	148.421	991.072	173.684	2718.95	4.984	102.83	< LOD	0.00672258	0.0183678	0.119885	0.0220862	0.0175891		47.16	0.08	12.2	0.13	0	40.53	0.34	100.53		87.3312
PLT-17-04-OL45-core1 - 1	100	1352.56	61.169		1.98522	290.192	153.152	498.861	3.63865	203.63	12.3338	131.704	1005.49	174.513	2542.59	8.01627	105.337	0.16167	1.20576	0.0286509	0.287736	0.147948	2.13711		46.6	0.07	12.53	0.12	0.04	40.33	0.34	100.15		86.8924
PLT-17-04-OL48-core1 - 1	100	1237.94	54.6808		1.39974	150.328	96.8245	318.048	3.6091	257.866	11.1018	47.4509	1091.5	178.487	1773.68	3.76497	115.349	< LOD	0.00536227	0.0108595	0.17172	0.0493833	0.00425396		45.63	0.05	13.98	0.15	0.02	40.03	0.23	100.21		85.3317
PLT-17-04-OL50-core1 - 1	100	1498.88	69.5142		0.376852	258.904	251.88	616.787	3.82297	131.927	12.5345	227.479	959.231	167.64	2945.43	5.27105	100.415	0.0109144	0.0239098	0.0282522	0.0936296	0.0121713	0.0308302		47.24	0.1	11.48	0.12	0.03	40.36	0.38	99.86		88.0082
PLT-17-04-OL51-core1 - 1	100	1370.64	62.1964		1.89566	223.938	163.664	446.679	3.68403	188.743	12.427	173.728	989.079	172.026	2784.85	5.4306	103.646	< LOD	0.00843561	0.0167817	0.117299	0.0175689	0.02416		47.01	0.08	12.2	0.14	0.01	40.54	0.35	100.46		87.2844
PLT-17-04-OL52-core1 - 1	100	987.088	40.6306		< LOD	90.677	26.3847	173.269	3.32747	193.604	4.80802	82.3566	1133.21	161.298	2111.01	1.13028	107.181	< LOD	0.0245697	0.00500712	0.294601	0.332138	0.0437792		45.66	0.02	13.97	0.15	0.03	40.26	0.23	100.42		85.3477
PLT-17-04-OL52-core2 - 1	100	988.12	40.688		< LOD	82.3632	26.5547	167.622	3.34508	194.865	4.88178	83.547	1122.21	160.961	2101.99	1.3487	105.425	< LOD	0.00404918	0.00455031	0.294541	0.337629	0.00202208											85.35
PLT-17-04-OL53-core1 - 1	100	962.839	39.2834		1.68602	127.055	22.6175	169.609	3.33351	195.433	4.68057	105.363	1123.88	151.9	2113.03	1.16228	103.424	0.172722	1.20803	0.0063209	0.376127	0.440476	2.3764		46.48	0.15	12.82	0.13	0.02	40.09	0.26	100.03		86.5953
PLT-17-04-OL56-core2 - 1	100	999.931	41.345		< LOD	98.1447	28.5591	183.61	3.31005	194.124	5.20725	73.3893	1095.78	163.457	1713.17	1.806	101.1	0.0312389	0.438867	0.00863349	0.343104	0.388885	0.634057		45.78	0.02	13.79	0.13	0.03	40.13	0.22	100.18		85.5452
PLT-17-04-OL56-core1 - 1	100	998.127	41.2446		< LOD	81.5927	28.2459	175.951	3.3637	200.57	5.2772	74.6565	1107.65	161.94	1685.9	1.56522	99.1796	< LOD	0.0240659	0.00572879	0.291788	0.310348	0.00734877		45.74	0.04	13.76	0.12	0.02	40.05	0.23	100.09		85.5664
PLT-17-04-OL57-core1 - 1	100	951.498	38.654		2.83854	126.881	21.0007	190.538	3.45369	164.623	3.73076	58.2715	1458.39	169.862	1418.42	0.240066	156.617	0.0254875	0.340119	0.0100493	0.537552	0.434173	0.402008		43.15	0.04	17.25	0.2	0.02	39.52	0.19	100.42		81.68
PLT-17-04-OL58-core1 - 1	100	984.197	40.4699		< LOD	103.622	25.9126	211.658	3.32293	197.396	4.83884	92.5498	1096.87	158.35	1651.3	0.847426	100.375	0.071881	0.865294	0.0156552	0.393655	0.460704	1.14275		46.93	0.04	12.31	0.13	0.02	40.27	0.24	100.04		87.1712
PLT-17-04-OL59-core1 - 1	100	1457.72	67.1594		< LOD	236.117	220.894	534.89	3.67579	161.539	12.5567	140.272	953.388	172.224	2928.27	3.8841	101.35	0.0335412	0.310666	0.0261595	0.152768	0.0804149	0.545173		47.29	0.09	11.67	0.1	0.02	40.35	0.36	99.99		87.8423
PLT-17-04-OL60-core1 - 1	100	916.529	36.7159		1.86044	99.8946	16.5577	170.7	3.42067	204.768	3.72388	69.8241	1462.27	163.727	1518.77	0.300891	152.2	0.00972044	0.0458132	0.00565851	0.559147	0.716108	0.0670495		43.43	0.04	16.81	0.19	0	39.83	0.19	100.54		82.1568
PLT-17-04-OL61-core1 - 1	100	972.304	39.809		0.861462	94.0488	24.0367	185.088	3.39988	168.133	3.96275	60.9326	1395.69	170.771	1494.77	0.747959	152.18	0.0145044	0.15311	0.00720204	0.469099	0.41611	0.184646		43.3	0.03	17.04	0.18	0.01	39.32	0.18	100.14		81.9101
PLT-17-04-OL61-core2 - 1	100	974	39.9033		0.704031	101.583	24.2979	179.329	3.40538	168.104	3.95816	61.3418	1387.67	170.627	1492.42	1.42862	151.366	0.0364481	0.310315	0.00764333	0.474189	0.427173	0.418218		43.37	0.03	17.04	0.18	0	39.41	0.18	100.28		81.944
PLT-17-04-OL61-core3 - 1	100	978.19	40.136		0.453778	102.251	24.952	194.486	3.41757	170.337	3.91532	61.3468	1392.35	170.016	1504.15	1.12634	150.701	0.0394575	0.529422	0.0128264	0.522736	0.464555	0.691329											81.94
PLT-17-04-OL62-core1 - 1	100	1332.17	60.0117		1.63943	183.42	141.847	453.037	3.78332	229.527	10.3333	268.317	1058.61	172.043	2354.46	1.34028	89.3477	0.0367787	0.359858	0.0195808	0.205493	0.0923788	0.421315		47.07	0.06	12.35	0.11	0.04	40.54	0.29	100.54		87.1677
PLT-17-04-OL63-core1 - 1	100	1467.52	67.7199		0.471881	251.092	228.042	576.521	3.80322	144.831	12.5183	211.742	953.961	168.782	2968.05	2.32711	103.163	< LOD	0.0124193	0.0272656	0.110377	0.0128579	0.0530135		47.46	0.09	11.41	0.14	0.01	40.59	0.38	100.28		88.1152
PLT-17-04-OL64-core1 - 1	100	1439.9	66.1419		0.804646	255.462	208.274	501.557	3.65455	156.612	12.5287	139.756	950.218	172.371	3060.63	6.45708	102.537	< LOD	0.0128329	0.0206404	0.114075	0.0140812	0.0649875		47.47	0.09	11.6	0.13	0.02	40.61	0.35	100.39		87.9384
PLT-17-04-OL65-core1 - 1	100	903.482	35.9938		1.7044	180.907	15.0971	368.728	3.49363	101.44	2.18344	46.7247	1644.22	151.614	1706.56	0.557992	131.684	0.309946	3.25493	0.0516077	0.766603	1.0121	4.96785		44.02	0.03	16.32	0.18	0	39.7	0.24	100.53		82.7807
PLT-17-04-OL66-core1 - 1	100	937.504	37.8779		1.10006	103.394	19.1269	202.9	3.49596	167.068	3.68559	61.2404	1457.53	167.252	1437.78	0.866194	151.991	0.0375944	0.493513	0.0157555	0.687009	0.518765	0.641215		43.31	0.02	16.87	0.19	0.01	39.78	0.18	100.4		82.0726
PLT-17-04-OL70-core1 - 1	100	909.023	36.3004		1.10719	149.581	15.7049	341.398	3.50812	134.961	3.23664	40.8367	1550.61	166.469	1090.7	0.761634	150.482	0.25229	3.0906	0.0372344	0.757583	0.791588	3.381		42.64	0.04	17.95	0.17	0	39.4	0.14	100.39		80.9033
PLT-17-04-OL71-core1 - 1	100	1321.82	59.4246		1.92839	197.289	136.325	398.529	3.6545	224.725	12.3198	114.456	1042.13	177.034	2393.82	3.21612	111.466	< LOD	0.00527903	0.0152242	0.131197	0.0285055	< LOD		46.33	0.06	13.05	0.13	0.02	40.44	0.31	100.44		86.3484
PLT-17-04-OL71-core2 - 1	100	1321.32	59.3963		1.8578	209.572	136.063	401.209	3.65639	222.617	12.2607	114.51	1037.46	178.135	2398.18	4.29102	112.385	< LOD	0.00952957	0.0165693	0.143346	0.0292293	0.0882171											86.35
PLT-17-04-OL72-core1 - 1	100	1325.47	59.6317		1.82843	201.611	138.256	402.294	3.634	213.913	12.2431	117.403	1028.77	175.711	2391.14	0.775914	108.851	< LOD	0.0366956	0.0159881	0.132797	0.0257507	< LOD		46.4	0.07	12.93	0.13	0.01	40.23	0.28	100.14		86.4814
PLT-17-04-OL74-core1 - 1	100	1297.71	58.0585		1.00157	199.063	124.026	373.484	3.68927	234.082	11.7943	281.329	1001.05	154.41	2994.42	5.70784	89.083	< LOD	0.0163233	0.0131271	0.141299	0.033755	< LOD		48	0.06	10.82	0.11	0.04	40.73	0.38	100.23		88.7764
PLT-17-04-OL76-core1 - 1	100	981.876	40.3409		0.703757	89.6917	25.5383	187.383	3.494	176.997	4.10536	65.4047	1433.21	169.28	1499.85	0.220372	143.659	< LOD	0.0653539	0.00643391	0.501273	0.39454	0.0852886		43.25	0.04	17.03	0.17	0	39.58	0.21	100.35		81.9043
PLT-17-04-OL78-core1 - 1	100	1419.45	64.9756		1.34298	220.243	194.377	489.549	3.65829	172.696	12.6685	127.32	971.308	173.46	2833.31	1.46373	103.596	< LOD	0.0353501	0.0224195	0.114333	0.0192627	0.00979341		47.21	0.08	11.92	0.12	0.02	40.4	0.39	100.26		87.5884
PLT-17-04-OL79-core1 - 1	100	971.672	39.7739		0.61279	80.8986	23.9398	161.299	3.37774	183.16	3.8808	123.995	1212.07	148.927	2287.08	0.608611	108.98	< LOD	0.0182218	0.00640767	0.46092	0.447329	< LOD		46.86	0.04	12.7	0.16	0.03	40.39	0.3	100.53		86.8058
PLT-17-04-OL80-core1 - 1	100	697.336	24.6587		2.06333	52.5146	2.51496	144.514	3.3407	87.6833	2.08575	78.0319	1433.99	142.095	2943.45	0.210524	108.86	< LOD	0.0202727	0.00273832	0.286858	0.408174	< LOD		47.16	0.03	11.85	0.15	0.01	40.57	0.36	100.21		87.6474
PLT-17-04-OL81-core1 - 1	100	1399.01	63.8105		1.29785	222.706	181.092	466.159	3.67052	180.801	12.6815	133.503	980.045	174.958	2774.76	4.22012	103.759	0.00684287	0.0788369	0.0205175	0.12805	0.0296042	0.111655		46.94	0.08	12.06	0.12	0.02	40.5	0.37	100.22		87.4094
PLT-17-04-OL82-core1 - 1	100	1337.89	60.3361		1.56303	200.677	144.959	419.936	3.69838	213.633	12.3675	122.982	1023.92	175.658	2449.55	5.10386	107.39	< LOD	0.00542416	0.0167786	0.137267	0.024591	0.0017435		46.44	0.07	12.88	0.14	0.02	40.28	0.32	100.26		86.5247
PLT-17-04-OL83-core1 - 1	100	1402.56	64.0126		1.02696	225.266	183.354	472.061	3.67512	173.244	12.4786	124.536	967.319	172.999	2803.96	5.98255	103.776	0.00649469	0.00615686	0.0191459	0.117859	0.0174763	0.00823781		47.26	0.09	12.01	0.11	0.01	40.45	0.36	100.4		87.5179
PLT-17-04-OL85-core1 - 1	100	988.535	40.711		< LOD	80.1426	26.6232	168.742	3.33923	198.189	4.96932	89.8623	1135.65	159.697	2079.83	0.936208	105.475	< LOD	0.0494395	0.00564153	0.308705	0.333433	0.0910396		46.1	0.03	13.59	0.14	0.02	40.34	0.25	100.59		85.8138
PLT-17-04-OL88-core1 - 1	100	1417.88	64.8857		1.02718	218.475	193.331	489.032	3.67203	155.827	12.3072	132.563	971.48	173.73	2791.84	4.73183	102.782	< LOD	0.00820908	0.0211569	0.0917744	0.0129064	< LOD		46.94	0.1	11.98	0.14	0.02	40.31	0.34	99.95		87.4682
PLT-17-04-OL89-core1 - 1	100	980.157	40.2454		< LOD	90.9754	25.2637	174.419	3.39679	185.332	4.75514	66.566	1185.94	164.681	1697.27	1.46099	118.69	0.0127734	0.097463	0.00559664	0.304422	0.352847	0.166126		44.25	0.1	16	0.14	0.02	39.1	0.27	100.03		83.1311
PLT-17-04-OL89-core1 - 2	100	985.344	40.5336		< LOD	116.698	26.0992	248.818	3.41454	184.433	4.68986	65.4459	1181.09	163.958	1683.71	1.13574	117.051	0.125118	1.29941	0.0218178	0.48356	0.522546	1.73144											83.13
PLT-17-04-OL90-core1 - 1	100	1400.5	63.8956		1.55503	230.595	182.043	479.916	3.69087	176.44	12.4414	131.324	976.349	174.389	2808.16	6.22114	104.446	< LOD	0.00588643	0.0204585	0.110111	0.0209281	0.00130441		47.14	0.08	12.06	0.11	0.02	40.54	0.37	100.4		87.452
PLT-17-04-OL92-core1 - 1	100	1064.95	44.9695		1.10701	104.257	41.6482	205.88	3.97647	205.675	6.98846	127.99	1248.9	184.937	1450.16	3.20941	117.863	< LOD	0.00169651	0.00872344	0.245336	0.0760536	0.00426716		44.33	0.03	16.11	0.16	0	39.69	0.19	100.59		83.0674
PLT-17-04-OL92-core2 - 1	100	1049.29	44.0955		0.821048	143.921	38.1624	252.736	3.62721	184.333	4.24941	66.9092	1229.21	182.607	1464.46	2.64095	117.807	0.143669	1.41956	0.0208046	0.370056	0.249097	1.97067		44.46	0.04	15.79	0.14	0.03	39.77	0.17	100.46		83.3906
PLT-17-04-OL93-core1 - 2	100	1227.42	54.0871		1.06866	140.24	92.5008	362.752	3.61175	235.001	5.45143	251.587	1136.82	178.227	2436.66	3.78125	95.5779	0.0695859	0.70777	0.0215511	0.283465	0.159713	0.941856											86.24
PLT-17-04-OL94-core1 - 1	100	1371.29	62.2334		1.09548	215.779	164.051	436.748	3.68839	187.066	12.472	152.011	983.267	171.739	2706.3	5.31383	103.653	< LOD	0.0104785	0.0198694	0.130885	0.0241334	0.0250264		46.86	0.07	12.12	0.12	0.04	40.35	0.35	100.02		87.3312
PLT-17-04-OL95-core1 - 1	100	1003.9	41.566		0.671901	157.037	29.2578	344.706	3.49789	182.979	4.023	71.3947	1370.99	166.315	1571.17	1.91657	147.324	0.225259	2.37839	0.0426701	0.883025	0.814425	3.08761		43.79	0.02	16.43	0.18	0	39.69	0.19	100.35		82.6151
PLT-17-04-OL96-core1 - 1	100	1409.2	64.391		2.92179	296.405	187.637	561.218	3.85073	181.826	12.8481	172.56	1019.3	177.071	2578.62	2.9029	104.234	0.138121	1.52839	0.0262245	0.248446	0.120277	1.14779		46.84	0.08	12.52	0.14	0.02	40.61	0.32	100.65		86.9646
PLT-17-04-OL98-core1 - 1	100	726.075	26.2305		1.0071	103.163	3.37659	239.472	2.94431	100.682	2.20269	61.1194	1389.85	141.374	2180.48	0.474276	92.9797	0.179323	3.19476	0.0324111	0.324227	0.58707	6.28907		46.98	0.19	11.97	0.17	0.01	39.9	0.29	99.59		87.4877
PLT-17-04-OL99-core1 - 1	100	1233.55	54.4328		2.16399	177.989	95.0022	438.576	4.0949	209.763	7.54106	419.131	1170.97	155.703	2352.99	3.28708	80.6459	0.0676404	0.676339	0.0232909	0.323158	0.188086	0.92155		46.71	0.08	12.6	0.17	0.07	40.51	0.15	100.38		86.8507
PLT-17-04-OL102-core1 - 1	100	950.437	38.5951		1.06465	246.947	20.8539	493.828	3.58358	155.076	3.69024	60.6573	1451.91	165.911	1366.73	1.40844	151.72	0.542381	6.73118	0.104779	1.48371	1.36744	8.18218		42.94	0.03	17.31	0.19	0.03	39.33	0.19	100.09		81.549
PLT-17-04-OL103-core1 - 1	100	1400.6	63.9009		2.02493	274.39	182.102	652.254	3.73029	225.678	14.2731	139.095	998.83	173.875	2615.28	6.59629	105.598	0.228138	5.88256	0.0506179	0.533836	0.383088	1.99188		46.7	0.08	12.53	0.12	0.01	40.48	0.31	100.33		86.9167
PLT-17-04-OL104-core1 - 1	100	978.971	40.1794		1.47358	146.613	25.0754	200.687	3.51575	167.204	4.22259	59.9712	1403.88	171.405	1460.82	1.69325	153.541	0.159667	1.16373	0.0102436	0.519804	0.37648	2.27603		43.04	0.04	17.25	0.17	0	39.59	0.19	100.39		81.6396
PLT-17-04-OL105-core1 - 1	100	772.101	28.7536		0.680343	62.7117	5.23144	170.997	3.49725	110.58	2.525	37.61	1578.57	162.704	996.528	0.20616	143.204	< LOD	0.00534163	0.00523699	0.363375	0.373928	0.00300677		42.91	0.02	17.67	0.21	0	39.37	0.13	100.36		81.2254
PLT-17-04-OL106-core1 - 1	100	1016.83	42.2856		0.702323	247.186	31.618	254.732	3.48181	202.294	5.12053	101.119	1129.89	153.739	2180.32	1.60559	104.934	0.319391	2.76958	0.0153007	0.487699	0.478576	4.84782		46.07	0.03	13.7	0.12	0.01	40.17	0.26	100.44		85.7014
PLT-17-04-OL106-core2 - 1	100	993.149	40.9676		0.772862	328.976	27.3949	239.5	3.363	201.065	6.36159	100.377	1115.59	153.443	2186.01	3.25959	106.342	1.08545	7.70889	0.0130627	0.439818	0.534343	15.645		46.14	0.04	13.45	0.15	0.02	40.22	0.28	100.38		85.938
PLT-17-04-OL108-core1 - 1	100	1264.17	56.1614		1.22477	192.924	108.197	412.423	3.71899	275.265	7.58095	376.627	1093.79	174.033	2462.32	4.31479	96.4666	0.233351	2.08822	0.0374743	0.642449	0.478288	2.84712		46.24	0.08	13.05	0.12	0.05	40.43	0.32	100.6		86.3273
PLT-17-04-OL109-core1 - 1	100	969.422	39.6489		0.357289	87.8208	23.5977	183.726	3.52135	166.596	3.87287	63.6644	1406.36	168.409	1541.59	0.152681	154.764	< LOD	0.0304859	0.00751778	0.443612	0.378114	0.0400328		43.39	0.04	16.98	0.16	0	39.49	0.21	100.35		81.9943
PLT-17-04-OL110-core1 - 1	100	895.254	35.5386		1.26364	108.187	14.2276	200.498	3.54785	136.37	3.3444	52.725	1471.64	164.896	1329.88	0.757361	148.96	0.0578151	0.719456	0.0148549	0.464025	0.388075	0.929143		43.18	0.02	17.33	0.18	0.01	39.63	0.2	100.59		81.6246
PLT-17-04-OL111-core1 - 1	100	674.769	23.4263		1.21745	53.0836	1.97054	140.751	3.45013	80.5323	1.86039	51.4348	1574.1	147.856	1649.79	0.174302	123.71	< LOD	0.00240585	0.00454903	0.238773	0.461517	0.0314481		44.57	0.02	15.42	0.21	0.01	39.64	0.21	100.1		83.7383
PLT-17-04-OL111-core2 - 1	100	911.204	36.4211		2.01258	83.4295	15.9491	288.887	3.51367	127.009	2.22652	54.6788	1575.89	147.922	1638.81	0.407391	123.892	0.129044	1.25434	0.0245344	0.572265	0.753775	1.40205											83.74
PLT-17-04-OL112-core1 - 1	100	1456.59	67.0952		0.385555	243.329	220.083	566.553	3.73715	155.877	12.4513	139.939	942.765	169.272	3004.76	7.59158	101.313	0.0493545	0.411377	0.029794	0.183507	0.0820865	0.640083		46.98	0.1	11.57	0.12	0.04	40.36	0.36	99.68		87.8537
PLT-17-04-OL113-core1 - 1	100	909.262	36.3136		1.87389	103.653	15.7315	178.721	3.50301	145.103	3.44526	49.2757	1472.95	166.616	1307.95	0.308462	153.198	0.033774	0.190684	0.00700182	0.415857	0.345597	0.288871		42.97	0.03	17.28	0.2	0	39.38	0.15	100.08		81.5941
PLT-17-04-OL114-core1 - 1	100	1089.8	46.3585		< LOD	108.029	47.647	232.085	3.39474	181.32	6.79698	72.9672	1024.25	154.42	1965.05	1.446	103.367	0.0747495	0.610165	0.0113835	0.300709	0.170916	0.968357		46.63	0.04	12.7	0.13	0.02	40.16	0.25	100		86.7488
PLT-17-04-OL115-core1 - 1	100	1342.15	60.5778		0.987342	230.508	147.306	421.827	3.73689	209.889	12.2956	122.965	1019.46	175.224	2473	5.793	109.229	0.0244573	0.287406	0.0192974	0.167267	0.0565851	0.448238		46.64	0.07	12.63	0.12	0.01	40.21	0.29	100.11		86.8228
PLT-17-04-OL115-core2 - 1	100	1337.61	60.3204		0.976076	216.846	144.807	413.967	3.71396	207.844	12.2105	122.987	1015.8	175.145	2470.91	5.60185	108.388	< LOD	0.0102063	0.016194	0.136897	0.0276835	0.0665565		46.49	0.07	12.74	0.13	0.01	40.22	0.32	100.09		86.6694
PLT-17-04-OL118-core1 - 1	100	1372.83	62.3208		2.07716	216.493	164.967	443.714	3.77371	184.478	12.2216	154.851	979.097	169.817	2674.26	2.27926	101.149	0.00997724	0.115368	0.0189824	0.124004	0.0403705	0.172891		46.84	0.08	11.86	0.13	0.02	40.25	0.33	99.62		87.559
PLT-17-04-OL119-core1 - 1	100	974.813	39.9484		1.41631	165.841	24.4237	326.557	3.45069	197.042	4.58603	102.839	1132.35	152.342	1951.83	1.84893	105.601	0.274755	3.00815	0.0336298	0.523758	0.778964	4.11681		46.44	0.03	13	0.16	0	40.15	0.23	100.07		86.4243
PLT-17-04-OL120-core1 - 1	100	927.591	37.3285		1.76685	387.697	17.8777	686.225	3.69857	129.778	3.23538	46.6829	1542.18	166.887	1132.78	0.949189	151.303	0.839694	9.41261	0.13944	1.79537	1.68045	13.0722		42.69	0.03	17.26	0.19	0.02	39.37	0.14	99.76		81.5175
PLT-17-04-OL122-core1 - 1	100	724.92	26.1673		0.855908	60.6204	3.33795	159.07	3.4706	96.6098	2.19963	49.5625	1553.01	157.733	958.395	0.326149	131.488	< LOD	0.0065849	0.00382906	0.308071	0.373682	0.00773304		43.67	0.04	16.18	0.2	0.02	39.55	0.12	99.81		82.7975
PLT-17-04-OL124-core1 - 1	100	1303.7	58.3977		1.18764	186.528	127.009	376.483	3.76238	223.623	11.8842	124.354	1024.1	172.48	2347.91	5.05413	108.211	< LOD	0.0043949	0.015091	0.143509	0.031346	0.00464467		46.35	0.05	12.88	0.14	0.03	40.24	0.28	100.02		86.5155
PLT-17-04-OL125-core1 - 1	100	914.19	36.5863		1.07164	80.8588	16.2882	167.907	3.51249	159.846	3.53495	73.6154	1355.33	150.369	1665.65	0.706683	129.494	< LOD	0.0031053	0.00608382	0.435339	0.457278	0.015205		45.03	0.03	14.51	0.17	0	39.6	0.17	99.58		84.6875
PLT-17-04-OL126-core1 - 1	100	1412.77	64.5943		1.43857	232.973	189.964	484.878	3.82195	168.931	12.5359	125.234	967.887	173.801	2882.8	6.01163	105.657	< LOD	0.00653122	0.0202374	0.114819	0.0177847	0.00765891		47.03	0.07	11.89	0.13	0.01	40.58	0.35	100.21		87.5816
PLT-17-04-OL126-core2 - 1	100	1408.95	64.3771		1.18674	233.759	187.479	474.692	3.76051	165.744	12.2844	123.577	954.489	171.201	2837.97	6.16092	105.708	< LOD	0.00894515	0.0200119	0.112045	0.0178044	0.0174217		46.95	0.07	11.89	0.13	0.01	40.14	0.36	99.71		87.5623
PLT-17-04-OL127-core1 - 1	100	988.383	40.7026		0.363395	84.849	26.5981	178.241	3.45488	189.718	4.89214	78.3771	1140.6	161.528	2035.59	0.642899	111.017	0.0153887	0.135263	0.00643574	0.312805	0.343892	0.166074		45.13	0.02	14.45	0.13	0.02	40.01	0.24	100.07		84.7735
PLT-17-04-OL129-core - 1	100	1342.13	60.5767		4.09073	176.266	147.296	466.357	3.86873	204.371	11.0551	199.55	1034.75	171.649	2412.51	2.21904	100.42	< LOD	0.00693941	0.0179188	0.128384	0.0235742	0.0090536		46.43	0.07	12.77	0.13	0	40.31	0.3	100.1		86.6295
PLT-17-04-OL130-core1 - 1	100	1423.74	65.2198		1.22746	241.235	197.237	494.272	3.78403	159.038	12.4674	130.527	950.146	170.774	2924.67	6.13644	102.664	< LOD	0.00839085	0.0200221	0.104048	0.0156812	0.0109486		47.17	0.07	11.68	0.12	0.03	40.37	0.39	99.89		87.8005
PLT-17-04-OL130-core2 - 1	100	1422.5	65.1494		1.19559	240.114	196.41	494.838	3.76961	159.018	12.381	130.297	948.93	171.285	2918.97	6.11417	102.139	< LOD	0.00725037	0.019662	0.106113	0.0127849	< LOD											87.8
PLT-17-04-OL130-core3 - 1	100	1424.3	65.2521		1.17228	240.947	197.618	493.725	3.81079	157.99	12.3478	130.065	948.027	171.218	2922.34	6.06352	102.112	< LOD	0.00850117	0.0197104	0.101577	0.0149702	0.00870204											87.8
PLT-17-04-OL133-core1 - 1	100	978.876	40.1742		0.702989	103.656	25.0604	210.395	3.45049	191.212	4.22131	108.386	1171.31	152.623	2383.89	1.26773	115.453	0.061789	0.697656	0.0150589	0.440676	0.508163	0.892588		45.71	0.04	13.6	0.17	0	39.81	0.28	99.67		85.6963
PLT-17-04-OL134-core1 - 1	100	1388.89	63.2347		1.33037	232.651	174.745	452.318	3.79156	178.177	12.1824	189.958	974.352	165.809	2898.16	6.10029	103.739	< LOD	0.00684645	0.0185739	0.121304	0.020823	< LOD		47	0.07	11.89	0.13	0.04	40.37	0.38	99.96		87.5739
PLT-17-04-OL135-core1 - 1	100	1413.19	64.6188		1.96486	309.337	190.245	657.312	3.8277	188.866	12.529	140.436	980.752	172.357	2689.83	5.70605	104.423	0.226432	2.50671	0.0578418	0.491744	0.350599	2.89156		46.62	0.08	12.23	0.11	0.02	40.13	0.32	99.62		87.1662
PLT-17-04-OL137-core1 - 1	100	1410.9	64.4881		1.33017	234.355	188.747	479.468	3.84458	178.017	12.4536	130.101	970.147	172.342	2777.87	5.63486	103.731	< LOD	0.00953154	0.020813	0.108448	0.0142781	0.0266773		46.94	0.09	12.04	0.13	0.01	40.45	0.36	100.14		87.4173
PLT-17-04-OL138-core1 - 1	100	1327.64	59.7548		0.753565	192.795	139.413	397.674	3.80617	217.321	12.212	115.545	1025.78	175.173	2374.53	3.72273	109.607	< LOD	0.00734203	0.0173448	0.142342	0.0275939	0.0124611		46.35	0.07	12.95	0.13	0.02	40.11	0.28	100.01		86.4456
PLT-17-04-OL139-core1 - 1	100	983.011	40.404		1.00464	107.35	25.7209	219.073	3.50045	195.008	4.92168	67.553	1104.39	159.319	1531.67	1.61392	103.774	0.0627868	0.612403	0.0134497	0.412063	0.437556	0.812454		46.54	0.07	13.36	0.14	0.01	39.69	0.19	100.12		86.1377
PLT-17-04-OL141-core1 - 1	100	1335.02	60.1732		1.36888	240.134	143.39	435.277	3.77905	209.816	12.1749	116.676	1016.47	175.205	2438.99	2.32983	108.228	0.0209545	0.23905	0.019047	0.172748	0.0556455	0.179088		46.41	0.05	12.81	0.14	0.02	40.11	0.34	99.98		86.6021
PLT-17-04-OL142-core1 - 1	100	1518.34	70.6297		1.44371	313.54	267.435	571.837	3.92988	122.205	11.2166	156.42	918.177	166.079	3132.43	7.16863	101.997	< LOD	0.0133509	0.0271228	0.0984592	0.00948573	0.0617426		47.58	0.08	10.93	0.12	0.01	40.65	0.41	99.99		88.5789
PLT-17-04-OL143-core1 - 1	100	1342.78	60.6137		2.26276	232.267	147.657	417.285	3.85261	201.046	12.045	126.323	1012.29	174.215	2493.05	5.95889	107.67	0.00799037	0.0229085	0.016101	0.159859	0.0248565	0.15035		46.69	0.06	12.67	0.12	0.02	40.2	0.32	100.19		86.7844
PLT-17-04-OL145-core1 - 1	100	986.722	40.6102		1.51708	122.181	26.3245	209.109	3.6586	168.384	3.98767	63.3041	1393.68	166.873	1623.63	0.851256	151.783	0.0288548	0.32207	0.0100227	0.516536	0.428729	0.526275		43.59	0.03	16.99	0.19	0	39.59	0.19	100.65		82.0618
PLT-17-04-OL146-core1 - 1	100	1331.6	59.9793		0.943171	228.369	141.538	407.635	3.84704	217.316	12.1513	119.685	1033.03	175.198	2417.17	2.59068	109.944	0.00821699	0.0202718	0.0165035	0.169798	0.0283784	0.195488		46.66	0.05	13.08	0.15	0.01	40.29	0.29	100.66		86.4092

## Sheet: Premier
Dataset 1f. EPMA, LA-ICP-MS and Al-in-olivine thermometry data for Premier kimberlite.
					LA-ICP-MS data done at Carnegie - See methods.										EPMA data done at Carnegie - See methods.
	Spot Size (µm)	T (°C)	P (kbars)		Al	Ca	Ti	V	Cr	Mn	Co	Ni	Zn		MgO	TiO2	CaO	FeO	MnO	Cr2O3	SiO2	NiO	Al2O3	Total		Mg#
Un 5 PRK-4 47	35	1387.72	66.0323		174.173	324.814	225.325	12.5252	100.642	1218.41	168.133	1997.77	102.172		45.4359	0.042059	0.065606	13.9407	0.150687	0	40.2571	0.286244	0	100.178		85.3153
Un 5 PRK-4 35	35	1496.25	72.5188		285.636	555.17	170.672	13.7026	258.669	1071.11	161.084	2184.72	80.98		45.989	0.028928	0.103613	13.1759	0.121096	0.007428	40.304	0.283823	0.012709	100.026		86.1532
Un 5 PRK-4 27	35	1483.03	71.7267		268.965	518.109	154.051	15.1593	200.881	1139.49	177.252	2289.42	97.6182		46.279	0.009881	0.083	13.04	0.127685	0.015176	40.1931	0.317196	0.045187	100.11		86.3507
Un 5 PRK-4 18	35	1176	53.5142		66.0646	1309.02	158.812	7.51846	41.8386	1058.78	148.147	1447.73	82.3995		47.0908	0.021934	0.041517	12.2033	0.125894	0.019384	40.4786	0.179661	0	100.161		87.3076
Un 5 PRK-4 37	35	1481.14	71.6128		266.649	526.716	141.164	12.9478	266.826	1089.35	154.765	2441.16	76.6918		47.3113	0.03395	0.090057	11.7242	0.139349	0.039894	40.6699	0.319255	0.000944	100.329		87.7949
Un 5 PRK-4 6	35	1385.73	65.914		172.599	379.074	207.564	10.844	188.884	1072.15	151.473	2274.37	78.9986		46.9002	0.031865	0.052514	11.5119	0.134602	0.015969	40.617	0.309006	0.190398	99.7635		87.897
Un 5 PRK-4 15	35	1497.67	72.6044		287.496	500.409	166.191	12.9463	215.466	1023.2	151.479	2720.32	80.4747		48.05	0.023508	0.088414	10.9564	0.132675	0.021161	40.6391	0.367484	0.001993	100.281		88.6591
Un 5 PRK-4 12	35	1482.37	71.6868		268.151	576.986	196.221	12.5171	661.429	1001.66	149.238	2273.22	66.5866		47.9119	0.024914	0.100698	10.8438	0.127868	0.075665	40.7613	0.328654	0.015586	100.19		88.7338
Un 5 PRK-4 43	35	1512.66	73.5041		307.787	544.645	154.902	14.1271	443.426	1077.93	157.927	2598.51	73.9918		47.6587	0.029108	0.099934	10.671	0.132994	0.083675	40.7994	0.330171	0.060779	99.8658		88.841
Un 5 PRK-4 16	35	1418.14	67.8458		200.109	420.587	148.064	12.5046	299.84	995.792	138.904	2543.61	75.1691		47.7112	0.042184	0.080701	10.6636	0.135696	0.043918	40.8931	0.327854	0.027046	99.9253		88.8588
Un 5 PRK-4 41	35	1491.42	72.2294		279.431	619.763	173.226	13.2305	519.281	1024.2	137.599	2553.7	72.5249		48.3595	0.026801	0.09574	10.7144	0.146557	0.090934	40.7811	0.385988	0.003584	100.605		88.945
Un 5 PRK-4 14	35	1500.16	72.7534		290.764	523.153	146.488	12.4578	515.077	1067.31	156.97	2830.4	64.6622		48.2487	0.010352	0.077279	10.4948	0.144084	0.052695	40.9281	0.376334	0.003982	100.336		89.1248
Un 5 PRK-4 20	35	1436	68.912		217.084	466.416	141.181	12.3716	368.835	1065.45	151.235	2832.52	71.7105		48.3402	0.004423	0.07587	10.3032	0.107726	0.039164	40.9499	0.348644	0.000496	100.17		89.3202
Un 5 PRK-4 2	35	1388.17	66.0592		174.532	291.877	96.8311	10.8934	200.922	948.595	140.645	2539.05	69.7519		48.4186	0.021173	0.070468	10.2476	0.133772	0.020462	40.9219	0.331456	0.141062	100.306		89.3871
Un 5 PRK-4 22	35	1413.63	67.5765		196.032	325.282	118.783	10.8151	360.842	822.062	139.281	2664.82	70.1012		48.4242	0.012866	0.10064	10.1692	0.154144	0.041574	40.9017	0.341875	0.002785	100.149		89.4608
Un 5 PRK-4 30	35	1422.83	68.1255		204.432	404.94	228.081	14.4735	560.88	964.18	134.267	2629.65	64.6335		48.358	0.038473	0.07534	10.0753	0.122964	0.085073	41.0003	0.345542	0.012423	100.113		89.5351
Un 5 PRK-4 5	35	1448.22	69.6428		229.526	618.657	135.95	10.7161	636.599	995.868	147.112	2726.49	62.2092		48.8146	0.016481	0.099192	9.93128	0.119934	0.094232	40.9956	0.343763	0.020292	100.435		89.756
Un 5 PRK-4 1	35	1312.7	61.5759		123.618	344.843	70.7749	9.08481	183.554	903.631	144.119	2569.9	60.234		48.9055	0.010344	0.059036	9.85356	0.140849	0.018895	40.7701	0.328904	0	100.087		89.845
Un 5 PRK-4 10	35	836.588	33.8195		13.7949	174.303	65.1407	2.40258	63.0472	1133.66	138.001	2706.43	67.5858		49.2734	0.024375	0.017461	9.88313	0.135985	0	40.9018	0.342526	0	100.579		89.886
Un 5 PRK-4 21	35	1399.89	66.7575		184.123	357.444	123.591	10.3652	236.781	884.999	136.631	2688.06	66.6665		48.6959	0.007245	0.062355	9.70802	0.11349	0.038862	40.9063	0.370376	0.014087	99.9166		89.9412
Un 5 PRK-4 26	35	1391.26	66.2433		177.013	327.14	118.879	10.0241	197.618	883.954	140.283	2687.21	65.117		49.2555	0.019118	0.075431	9.53907	0.131864	0.011519	41.1489	0.345624	4.9e-05	100.527		90.2003
Un 5 PRK-4 31	35	1440.58	69.1859		221.669	497.78	209.231	12.3656	549.577	948.821	141.907	2962.78	57.6451		49.0453	0.024039	0.079676	9.44779	0.137504	0.080862	41.1013	0.37697	0.000397	100.294		90.2475
Un 5 PRK-4 34	35	1406.5	67.1517		189.764	435.438	86.3184	10.0723	500.056	879.22	126.861	2571.94	55.373		48.8427	0.024956	0.093603	9.30001	0.109076	0.108396	41.2309	0.393922	0.197261	100.301		90.3493
Un 5 PRK-4 29	35	1354.03	64.0282		149.331	334.048	98.1147	9.30103	367.348	892.697	132.183	2578.88	56.9734		49.1025	0.021945	0.068507	9.29093	0.114816	0.080895	40.9397	0.374972	0.091029	100.085		90.4039
Un 5 PRK-4 32	35	1449.85	69.7399		231.232	469.77	140.868	12.3756	220.448	918.045	136.088	2733.47	56.9833		49.1244	0.037561	0.084694	9.24177	0.094673	0.019729	40.8129	0.361277	0.031218	99.8082		90.4537
Un 5 PRK-4 40	35	1422.37	68.0984		204.01	423.577	199.539	12.3703	629.776	891.301	127.044	2698.64	64.578		49.3142	0.031531	0.071692	9.219	0.108313	0.066133	40.7964	0.364853	0.001345	99.9735		90.5082
Un 5 PRK-4 11	35	1410.66	67.3996		193.397	424.729	92.0502	9.69729	195.966	846.051	135.937	2724.74	58.5965		49.2483	0.024002	0.076453	9.17626	0.112806	0.029524	41.1859	0.376799	0.163618	100.394		90.5366
Un 5 PRK-4 33	35	1431.54	68.6458		212.72	454.81	159.906	11.7935	410.127	870.6	130.092	2563.68	54.9811		49.2788	0.021056	0.084927	9.01263	0.116632	0.04191	41.0605	0.354417	0.00985	99.9807		90.6948
Un 5 PRK-4 25	35	1440.33	69.171		221.417	398.042	185.193	11.0494	420.649	897.993	139.445	3075.84	57.078		49.3876	0.029023	0.068626	8.97991	0.117522	0.029751	41.2275	0.402756	0.001293	100.244		90.744
Un 5 PRK-4 38	35	1409.17	67.311		192.09	378.258	53.3198	7.61641	480.419	850.596	129.471	3031.31	54.8178		49.6814	0.013302	0.072106	8.88018	0.126731	0.083488	41.1347	0.433735	0.023908	100.45		90.8867
Un 5 PRK-4 13	35	1369.47	64.9461		160.246	368.313	152.495	9.39138	265.169	825.839	127.406	2589.56	55.0748		49.771	0.025356	0.060126	8.60969	0.094919	0.028089	41.2542	0.400259	0.012962	100.257		91.1542
Un 5 PRK-4 19	35	1428.48	68.4629		209.769	404.139	181.945	10.0959	490.183	851.321	127.96	2699.93	53.9448		49.5838	0.044203	0.083228	8.49562	0.106246	0.054727	41.3288	0.362284	0.161992	100.221		91.2311
Un 5 PRK-4 36	35	1459.41	70.3119		241.528	479.27	126.056	11.8549	596.672	995.817	119.596	2594.89	45.5493		49.7884	0.008375	0.086693	8.3911	0.11412	0.094238	41.2373	0.371661	0.071926	100.164		91.3621
Un 5 PRK-4 28	35	1428.23	68.4479		209.529	441.297	131.274	11.041	356.935	934.251	133.701	2750.19	50.6283		50.003	0.02805	0.072093	8.37263	0.112796	0.051052	41.2327	0.366886	0.051436	100.291		91.4133
Un 5 PRK-4 7	35	1363.74	64.6054		156.106	318.633	107.133	9.42483	420.392	805.822	128.335	2660.3	50.9643		50.2144	0	0.081049	8.36884	0.093104	0.055338	41.3813	0.352745	0	100.547		91.4499
Un 5 PRK-4 42	35	1481.18	71.6157		266.707	459.041	154.129	9.86619	840.145	857.341	126.295	2731.97	54.4737		49.2894	0.036932	0.080479	8.06576	0.108453	0.349945	41.249	0.367496	0.215335	99.7628		91.5919
Un 5 PRK-4 24	35	1402.58	66.9176		186.394	407.118	154.028	9.32803	421.199	941.065	132.876	2581.84	53.5136		50.2031	0.00737	0.05746	8.1891	0.114601	0.051716	41.0402	0.360766	0	100.024		91.6164
Un 5 PRK-4 44	35	1435.93	68.9081		217.021	453.781	153.84	10.8541	431.6	879.735	132.106	2851.33	50.3104		50.0558	0.021204	0.07428	8.13734	0.131309	0.062363	41.0585	0.370799	0	99.9116		91.6425
Un 5 PRK-4 39	35	1320.34	62.0292		128.02	250.081	14.2516	7.14365	522.076	769.423	125.024	2744.19	47.4464		49.9433	0	0.048184	8.02525	0.102366	0.040884	41.4702	0.381838	0	100.012		91.7311
Un 5 PRK-4 3	35	1022.93	44.5748		32.6574	343.084	-29.3847	3.08807	100.017	709.951	136.313	3082.77	47.7029		50.4717	0.004741	0.019201	8.03736	0.09078	0.018668	41.4106	0.43765	0	100.491		91.7992
Un 5 PRK-4 4	35	915.849	38.3774		19.9139	94.0513	80.329	1.98177	133.644	941.918	133.348	2940.72	52.0852		50.4395	0.00565	0.025764	8.01614	0.124583	0.005877	41.5653	0.412772	0	100.596		91.8143
Un 5 PRK-4 9	35	1028.4	44.8929		33.4926	213.487	49.3758	1.7925	165.843	901.109	138.65	3032.93	48.4496		50.3722	0.01204	0.019593	7.87304	0.123175	0.016155	41.3926	0.363332	0	100.172		91.9388
Un 5 PRK-4 8	35	1066.16	47.0903		39.8608	153.333	45.8787	1.99484	156.526	923.733	127.884	2821.07	44.8741		50.6023	0.00536	0.022467	7.84494	0.123552	0.008887	41.0922	0.370734	0	100.07		91.9989
Un 5 PRK-4 46	35	1331.45	62.6876		134.687	330.376	200.774	7.77301	320.572	686.936	122.534	2775.76	48.8234		50.6771	0.0179	0.053915	7.69366	0.078254	0.055782	41.2903	0.392395	0.005036	100.264		92.1517
Un 5 PRK-4 17	35	1348.04	63.6728		145.304	303.258	78.077	7.76216	435.071	814.674	138.847	3165.33	49.6578		50.803	0.006373	0.069762	7.70419	0.10334	0.054374	41.4542	0.415428	0.018801	100.629		92.1597
Un 5 PRK-4 23	35	1353.77	64.013		149.157	324.233	130.114	8.06956	341.872	733.085	123.251	2814.83	45.1895		50.9516	0.034587	0.054837	7.31042	0.100208	0.052461	41.3524	0.390682	0.025963	100.273		92.5507
Un 5 PRK-4 48	35	1284.62	59.9142		108.714	223.425	23.675	6.86416	577.328	729.784	122.229	2800.78	39.0637		51.2997	0.009615	0.047358	7.02185	0.098511	0.094761	41.3991	0.382364	0.003739	100.357		92.8689
PRK4 OL1C															47.659	0.018	0.073	10.685	0.119	0.033	40.12	0.333	0.003	99.062		88.8279
PRK4 OL2C															48.439	0.003	0.071	10.12	0.116	0.041	40.437	0.362	0.011	99.615		89.5092
PRK4 OL3C															49.723	0.002	0.079	8.487	0.113	0.058	40.661	0.36	0.034	99.54		91.2614
PRK4 OL4C															49.714	0.01	0.029	8.266	0.117	0.01	40.608	0.381	0.003	99.138		91.4681
PRK4 OL5C															50.151	0.033	0.062	7.756	0.091	0.061	40.74	0.408	0.017	99.349		92.0167
PRK4 OL6C															48.466	0.025	0.062	9.79	0.103	0.041	40.033	0.338	0.029	98.896		89.8215
PRK4 OL7C															43.108	0.022	0.089	16.553	0.126	0.02	38.85	0.297	0.035	99.13		82.2764
PRK4 OL8C															47.749	0.024	0.097	10.895	0.111	0.031	40.06	0.352	0.029	99.383		88.6522
PRK4 OL11C															47.695	0.014	0.067	10.862	0.114	0.04	39.9	0.341	0.024	99.078		88.6714
PRK4 OL13C															48.272	0.018	0.069	9.837	0.119	0.015	40.119	0.353	0.025	98.855		89.7408
PRK4 OL14C															49.679	0.017	0.061	8.074	0.097	0.047	40.296	0.418	0.016	98.705		91.6444
PRK4 OL17C															49.447	0.028	0.066	8.463	0.075	0.069	40.481	0.362	0.032	99.054		91.2396
PRK4 OL18C															48.924	0.011	0.064	8.683	0.105	0.097	40.365	0.445	0.073	98.815		90.9451
PRK4 OL19C															48.642	0.037	0.065	9.83	0.101	0.094	40.314	0.379	0	99.494		89.8174
PRK4 OL20C															50.89	0	0.005	6.784	0.077	0.009	40.809	0.363	0	98.948		93.0419
PRK4 OL23R															50.132	0.012	0.056	8.279	0.077	0.064	40.712	0.376	0.009	99.74		91.5211
PRK4 OL1R															47.753	0.009	0.088	10.497	0.123	0.036	40.101	0.379	0.026	99.028		89.0221
PRK4 OL2R															48.347	0.011	0.058	10.273	0.13	0.023	40.448	0.351	0.009	99.671		89.3493
PRK4 OL5R															50.197	0.039	0.062	7.824	0.056	0.034	40.758	0.369	0.007	99.367		91.9591
PRK4 OL6R															48.693	0.013	0.076	9.667	0.112	0.036	40.327	0.346	0.038	99.35		89.9787
PRK4 OL7R															43.244	0.034	0.09	16.154	0.155	0	38.901	0.328	0.027	98.961		82.6746
PRK4 OL8R															47.529	0.039	0.067	11.165	0.131	0.053	39.98	0.303	0.015	99.305		88.3562
PRK4 OL9C															44.153	0.054	0.087	15.59	0.136	0.029	39.341	0.251	0.019	99.677		83.4668
PRK4 OL10C															47.839	0.023	0.081	10.492	0.106	0.069	39.795	0.35	0.012	98.808		89.0443
PRK4 OL12C															49.804	0.011	0.067	8.22	0.112	0.036	40.103	0.386	0.034	98.775		91.5256
PRK4 OL13R															48.015	0.021	0.069	9.918	0.084	0.02	40.141	0.336	0.035	98.678		89.6154
PRK4 OL14R															49.684	0.02	0.067	8.094	0.081	0.08	40.033	0.419	0.034	98.554		91.6262
PRK4 OL15C															48.541	0.034	0.082	9.77	0.11	0.039	40.4	0.352	0.021	99.37		89.8543
PRK4 OL16C															49.286	0.009	0.076	8.658	0.084	0.126	40.569	0.354	0.047	99.254		91.0292
PRK4 OL17R															49.612	0.014	0.064	8.455	0.11	0.066	40.561	0.375	0.031	99.314		91.2737
PRK4 OL18R															47.706	0.01	0.091	10.195	0.15	0.08	39.976	0.369	0.049	98.652		89.2947
PRK4 OL20R															50.436	0.025	0.093	7.284	0.095	0.003	40.644	0.376	0.003	98.969		92.5053
PRK4 OL21C															48.443	0.027	0.067	9.849	0.124	0.079	40.274	0.358	0.045	99.321		89.7621
PRK4 OL24C															49.974	0.025	0.085	8.177	0.128	0.123	40.614	0.37	0.073	99.618		91.5925
PRK4 OL25C															45.198	0.025	0.06	13.993	0.132	0.011	39.631	0.253	0.036	99.339		85.2021
PRK4 OL25R															46.829	0.037	0.09	12.044	0.133	0.049	40.061	0.262	0.019	99.564		87.391

## Sheet: Murowa
		Dataset 1g. EPMA, LA-ICP-MS and Al-in-olivine thermometry data for Murowa kimberlite.
					LA-ICP-MS data done at Carnegie - See methods.									EPMA data done at Carnegie - See methods.
	Spot Size (µm)	T (°C)	P (kbars)		Al	Ti	V	Cr	Mn	Co	Ni	Zn		MgO	TiO2	CaO	FeO	MnO	Cr2O3	SiO2	NiO	Al2O3	Total		Mg#
M3-39	35	1388.84	63.2317		192.219	95.0633	9.85357	825.956	1022.59	140.702	2761.07	59.407		50.3311	0.007597	0.090444	9.13847	0.120541	0.1233	40.1211	0.336555	0.018865	100.288		90.756
M3-17	35	1344.93	60.7356		156.695	83.986	9.51795	578.937	947.316	136.16	2868.6	51.3986		49.9023	0.010215	0.072384	8.89074	0.114615	0.066784	40.7035	0.390662	0.013828	100.165		90.9135
M3-35	35	1339.62	60.4341		152.867	87.6465	10.1476	411.659	900.978	133.52	2720.64	52.2504		50.305	0.023624	0.066629	8.72739	0.110201	0.076343	40.7292	0.374113	0.037719	100.45		91.1307
M3-46	35	1345.57	60.7718		157.16	79.797	8.22032	833.46	969.868	134.174	2986.44	48.9488		50.1336	0.018515	0.078565	8.57955	0.12671	0.102194	40.5113	0.415135	0.016797	99.9824		91.2406
M3-34	35	1263.29	56.1119		107.111	115.869	8.89816	473.153	864.983	126.637	2247.56	49.9558		50.0755	0.010114	0.054687	8.5605	0.094986	0.067734	40.4293	0.335855	0.008524	99.6372		91.2491
M3-37	35	1161.45	50.3747		66.5726	98.3421	6.85515	400.052	838.77	125.763	2447.27	50.8326		50.4846	0.018425	0.046642	8.54944	0.123728	0.058171	40.8402	0.355945	0	100.477		91.3241
M3-13	35	1325.44	59.6297		143.099	17.8811	8.35862	514.704	900.468	134.311	2867.73	52.9339		50.0352	0.019237	0.081569	8.46631	0.108538	0.098651	40.8728	0.362321	0.015991	100.061		91.3307
M3-30	35	1287.16	57.4614		119.72	60.0678	8.87582	407.428	913.519	133.97	2815.1	48.7319		50.6693	0.012024	0.047131	8.33847	0.112451	0.078449	40.9606	0.373584	0.008522	100.601		91.5483
M3-5	35	1378.19	62.6255		182.925	72.3845	8.37088	894.779	912.944	132.935	2903.38	48.9993		50.7044	0.005608	0.072268	7.9887	0.113671	0.128724	40.7075	0.383849	0.013518	100.118		91.8792
M3-21	35	1219.01	53.613		87.1127	160.14	9.74095	294.21	901.478	126.459	2456.4	47.3832		51.0827	0.034225	0.047259	7.95723	0.139672	0.040796	41.09	0.328016	0.001685	100.722		91.9637
M3-10	35	1201.27	52.614		80.1884	63.4879	6.97955	442.56	753.889	122.302	2592.03	42.82		51.0847	0.010932	0.045031	7.83136	0.123855	0.071574	40.9646	0.378582	0.000445	100.511		92.0811
M3-43	35	1221.15	53.7338		87.989	80.717	4.35786	486.866	1059.4	127.736	2766.93	39.5357		51.2272	0.019058	0.063524	7.7952	0.126921	0.065514	40.8626	0.361964	0.011753	100.534		92.135
M3-6	35	1196.87	52.3662		78.5566	148.596	8.81751	345.201	795.382	130.545	2955.97	48.907		50.5564	0.020042	0.044123	7.68248	0.10238	0.037846	40.6328	0.387013	0.005444	99.4685		92.145
M3-24	35	1087.9	46.2521		47.187	3.87218	4.00466	215.456	893.183	136.29	2816.74	44.7961		51.0693	0.009337	0.019773	7.72816	0.101265	0.040524	40.9809	0.375137	0	100.324		92.1751
M3-22	35	1278.8	56.9886		115.145	8.72372	6.65861	301.237	699.686	123.719	2717.75	41.5446		50.9539	0	0.070971	7.70308	0.101263	0.026746	40.7834	0.3875	0.002727	100.03		92.1822
M3-27	35	1200.55	52.5731		79.9172	84.9032	5.87227	456.667	819.368	122.749	2749.02	39.0988		51.6039	0	0.057107	7.72938	0.104299	0.080404	41.2909	0.359548	0.003917	101.229		92.2487
M3-23	35	965.509	39.4316		26.5798	22.843	4.20729	318.494	927.404	132.965	2820.36	46.0311		51.2165	0.002511	0.022241	7.50608	0.102162	0.061477	41.1834	0.36126	0	100.456		92.403
M3-36	35	1168.92	50.7944		68.9385	32.5661	5.56458	319.152	694.445	122.3	2743.18	40.3885		51.2207	0.008331	0.037666	7.44973	0.117365	0.051054	41.1502	0.380936	0.007876	100.424		92.4564
M3-9	35	985.566	40.546		29.2045	98.4508	4.51584	308.485	728.493	118.197	2469.26	40.0748		51.2924	0.020979	0.032605	7.37372	0.105579	0.028199	40.6929	0.367509	0	99.9139		92.5372
M3-8	35	1240.18	54.807		96.1628	159.56	9.94634	368.761	834.706	121.038	2565.65	44.2474		51.4065	0.024486	0.039181	7.2905	0.09814	0.051691	40.9462	0.335838	0.008273	100.201		92.6304
M3-31	35	1011.59	41.9941		32.9986	126.191	4.76677	323.45	773.611	119.985	2503.1	41.4417		51.6804	0.007739	0.021851	7.26251	0.095216	0.026217	41.0796	0.360582	0	100.534		92.6927
M3-29	35	1148.66	49.6566		62.7082	138.072	5.57626	457.384	726.515	120.283	2572.04	40.5286		51.6938	0.015385	0.030726	7.18321	0.095269	0.075319	40.9818	0.359338	0	100.435		92.7684
M3-38	35	1219.06	53.6156		87.1321	45.958	5.73937	522.444	773.658	117.525	2535.74	39.9696		51.7621	0.008541	0.042293	7.14412	0.096072	0.088503	41.1542	0.356173	0.00972	100.662		92.8138
M3-16	35	1000.18	41.359		31.2785	117.269	5.00089	347.001	830.772	133.304	2854.3	45.58		51.9652	0.002313	0.021199	7.16395	0.109276	0.03886	41.0737	0.323566	0	100.698		92.8214
M3-44	35	1039.2	43.5326		37.5603	11.258	5.31416	456.934	692.014	112.281	2625.9	33.1779		51.4395	0.005829	0.053822	7.08485	0.124916	0.113461	41.0775	0.348932	0.004312	100.253		92.8276
M3-40	35	991.632	40.8833		30.048	110.693	3.99347	295.815	716.891	111.904	2486.16	39.4223		51.6042	0.0204	0.023044	6.99873	0.117907	0.048978	40.8283	0.351338	0	99.9929		92.9297
M3-3	35	1166.17	50.6397		68.0568	5.82974	5.26351	524.219	678.68	114.42	2618.09	31.6275		51.7499	0.006928	0.042516	6.82282	0.109493	0.04986	40.9543	0.36507	0.001337	100.102		93.1132
M3-20	35	1054.58	44.3907		40.3681	5.65455	4.24759	353.303	748.122	118.673	2575.72	35.9783		52.0118	0	0.020874	6.7386	0.115873	0.061698	41.1914	0.350693	0	100.491		93.2244
M3-11	35	1239.93	54.7929		96.0509	-0.213659	5.58442	479.841	601.545	110.594	2715.05	36.4142		52.2796	0	0.024004	6.55795	0.09618	0.075383	41.2351	0.342583	0.005706	100.617		93.4257
M3-18	35	1065.99	45.0275		42.5842	3.76139	4.99473	321.642	725.204	118.916	2704.36	36.8		52.5539	0	0.018145	6.5833	0.104095	0.035662	41.1157	0.360809	0	100.772		93.4341
M3-12	35	1030.69	43.058		36.0909	0.855499	2.57912	191.851	739.376	128.444	2871.77	40.8667		52.2149	0.005237	0.003203	6.49351	0.083985	0.036116	41.1417	0.362829	0	100.341		93.4785
M3-45	35	1017.77	42.3382		33.969	2.56694	3.32144	279.947	785.08	108.425	2438.59	35.4253		52.8422	0.006941	0.020192	6.54031	0.100498	0.047486	41.4418	0.342051	0	101.341		93.5075
M3-14	35	1018.18	42.361		34.0345	47.1613	4.59488	322.416	644.43	110.362	2539.26	35.5222		52.2363	0	0.035502	6.44235	0.094063	0.059021	41.1335	0.371556	0	100.372		93.529
M3-7	35	905.42	36.101		20.0407	74.8583	4.31955	270.924	737.62	114.44	2706.26	36.533		51.9269	0.010559	0.026246	6.35846	0.097387	0.021036	41.4235	0.36963	0	100.234		93.5723
M3-28	35	1224.45	53.9199		89.3558	21.5377	7.57926	414.307	667.924	116.419	2642.83	36.5078		52.301	0.000805	0.048958	6.38608	0.097522	0.027779	41.2928	0.34135	0.006102	100.502		93.5894
M3-19	35	1060.14	44.7011		41.434	10.2489	4.83118	342.604	681.747	114.475	2630.46	35.567		52.3099	0.006553	0.016493	6.30642	0.078797	0.031767	41.199	0.369876	0.002086	100.321		93.6653
M3-15	35	1019.29	42.4224		34.2109	3.50287	4.22176	225.687	706.62	113.265	2488.04	33.332		51.9717	0	0.031384	6.25878	0.075737	0.045862	40.8769	0.350577	0	99.6109		93.6718
M3-47	35	1181.9	51.5241		73.2502	2.74634	6.14158	472.157	668.32	113.954	2617.53	33.9357		52.5645	0	0.015667	6.32778	0.087417	0.081749	41.2623	0.368082	0	100.707		93.674
M3-32	35	1196.19	52.3277		78.306	1.93015	6.16093	592.181	655.741	112.98	2553.11	32.2019		52.646	0	0.023947	6.21591	0.071726	0.102554	41.5247	0.347812	0.002281	100.935		93.7879
M3-1	35	1037.95	43.4625		37.3395	18.2843	5.21101	413.17	648.75	108.853	2533.48	33.4115		52.5823	0.006339	0.020127	6.19632	0.076027	0.066684	41.1455	0.382987	0	100.476		93.7993
M3-42	35	1185.85	51.7462		74.615	12.6116	5.53908	571.515	722.371	116.302	2629.79	33.9813		52.6332	0	0.030483	6.0935	0.094462	0.076233	41.2807	0.358193	0.002431	100.569		93.9014
M3-26	35	1086.92	46.1972		46.9704	4.76771	3.81448	418.393	635.377	109.241	2585.4	36.1048		53.0616	0	0.016691	5.96331	0.07266	0.066201	41.9324	0.348124	0.007588	101.469		94.0693
M3-2	35	1198.1	52.4352		79.0076	53.5144	5.8347	393.589	700.415	116.329	2560.92	39.9584		52.534	0.007853	0.013867	5.89923	0.09573	0.058823	41.2131	0.332697	0.000941	100.156		94.0738
M3-25	35	1187.05	51.8136		75.0339	15.6351	4.7321	563.734	639.23	105.495	2511.46	32.4505		52.8475	0	0.020639	5.8603	0.086706	0.094106	41.3546	0.362375	0.008892	100.635		94.1436
M3-41	35	1178.08	51.3092		71.9536	5.14612	4.75125	521.167	612.902	105.996	2353.68	31.041		52.8786	0	0.019155	5.86262	0.062579	0.077901	41.2344	0.323393	0.000645	100.459		94.1446
M3-33	35	1099.64	46.9089		49.8536	27.0247	5.03143	426.205	541.512	103.13	2332.92	32.8307		53.1776	0.006252	0.016623	5.67232	0.067405	0.045658	41.6858	0.333796	0	101.005		94.354
M3-4	35	1182.94	51.5826		73.6072	9.71693	4.38748	442.625	504.229	106.226	2504.42	30.0289		53.3694	0.00877	0.005604	5.2276	0.07305	0.071712	41.493	0.351424	0	100.601		94.7913
