# Supplementary material for: The largest diamonds are hosted in iron-rich substrate accreted at the base of the lithosphere
Source: Research Square preprint supplement (doi:10.21203/rs.3.rs-6808081/v1), 2025-06-06
Supplement: Supplementary file 2 [file 8ebdee401c587dcc5fde0e15.xlsx]

## Sheet: Sheet1
Dataset 2. Bulk-rock Fe-isotopes for kimberlites analysed in this study.
Kimberlite location	Sample ID	d56Fe	2se	MgO (wt%)	Olivine rim	sd	Olivne core	sd
Igwisi Hills	IGWK-1	0.0678895	0.0119244	24.768	90.2		90.1809	0.333731
Zapolarnaya	ZAP-1 114/255	0.101313	0.0192084	33.2308			91.2003	1.7522
Leslie	BV4	0.0440008	0.00672845	40.2896	91.5506	0.140247	91.0829	1.6474
Leslie	BV14	0.0245045	0.0156216	34.1445	91.5506	0.140247	91.0829	1.6474
Aaron	Aaron 18	0.0365718	0.0250778	39.5	91.663	0.171303	91.5435	0.938474
Diavik	A154S-U353	0.028931	0.00895905	37.2894	91.1923	0.180678	91.2781	0.860074
Peuyuk	Peuyuk B	0.064371	0.0174724	28.6022	89.5777	0.123796	91.3504	2.12171
Pipe 1	1.106 (8.15-8.61m)	0.0388787	0.0247337	26.29	89.898	0.201	90.601	1.054
Letseng	KB14-01	0.108597	0.0168937	24.6	88.7161	0.377078	90.4267	3.57782
Damtshaa (BK/9)	105/018/K9/102	0.118549	0.0284735	32.3706	86.7327	0.378986	89.0873	4.3451
Karowe (AK/6)	AK6-S	0.0910224	0.0123619	33.8126	87.1473	0.256865	88.3499	2.14176
Uintjiesberg	173/26/K2/7	0.148698	0.0277455	23.33	86.9593	0.139933	89.4783	3.00628
Premier	PRK-10	0.164543	0.0208592	21.89	88.3546	0.24669	89.5827	2.59353
Wesselton	WA-1	0.095113	0.0205315	25.1	88.9165	0.207513	91.04	3.08
Benfontein	BUSK-2	0.0950582	0.013406	23.8535	88.7115	0.131412	90.7038	1.10392
