# Supplementary material for: The largest diamonds are hosted in iron-rich substrate accreted at the base of the lithosphere
Source: Research Square preprint supplement (doi:10.21203/rs.3.rs-6808081/v1), 2025-06-06
Supplement: Supplementary file 3 [file c68bfa67f2fc1acef077d3d5.xlsx]

## Sheet: Sheet1
Dataset 3. Calculations of Fe isotopes in Fe-rich xenocrystic olivine.
kimberlite		bulk d56Fe ‰	bulk MgO wt%	olivine xenocrysts								melt = magmatic olivine + groundmass
sample	locality					Fe-rich olivine			Mg-rich olivine
				Mg# average	F relative to total	F relative to olivine	F relative to total	d56Fe ‰	F relative to olivine	F relative to total	d56Fe ‰	melt fraction	d56Fe ‰
											0.03		0.0915
AK6-S	Karowe	0.091	33.8126	88.3	0.29	0.733333	0.212667	0.111513	0.266667	0.0773333	0.00232	0.71	0.064965
KB14-01	Letseng Satellite	0.108597	24.6	89.1	0.26	0.67	0.1742	0.219939	0.33	0.0858	0.002574	0.74	0.06771
WA-1	Wesselton	0.095113	25.1	91	0.16	0.31	0.0496	0.301231	0.69	0.1104	0.003312	0.84	0.07686
